# Supplementary material for: Identifying structure–absorption relationships and predicting absorption strength of non-fullerene acceptors for organic photovoltaics
Source: Royal Society of Chemistry journal article supplement (doi:10.1039/d2ee00887d), 2022-01-01
Supplement: d2ee00887d2.xlsx [file d2ee00887d2.xlsx]

## Sheet: Fig 1b&c
Y5_wavelength	Y5_n	Y5_k		Y6_wavelength	Y6_n	Y6_k		Y7_wavelength	Y7_n	Y7_k		IT-4F_wavelength	IT-4F_n	IT-4F_k		ITIC_wavelength	ITIC_n	ITIC_k		OIDFBR_wavelength	OIDFBR_n	OIDFBR_k		OIDTBR_wavelength	OIDTBR_n	OIDTBR_k		EHIDTBR_wavelength	EHIDTBR_n	EHIDTBR_k		PC71BM_wavelength	PC71BM_n	PC71BM_k		PC61BM_wavelength	PC61BM_n	PC61BM_k		IDIC_wavelength	IDIC_n	IDIC_k		IEICO-4F_wavelength	IEICO-4F_n	IEICO-4F_k
225.428	1.59329	0.42135		225.428	1.45514	0.58132		225.428	1.44006	0.52554		300	1.6763	0.0408872		300	1.60322	0.370562		1016.39	1.71334	-0.00170446		885.714	2.37458	0.0208046		310	1.48323	0.207141		995.984	1.98734	0.0192		247.97	1.47019	0.89755		227.579	1.30037	0.566227		225.43	1.4753	0.41467
226.237	1.6034	0.41382		226.237	1.4748	0.55727		226.237	1.44715	0.52993		300.751	1.67531	0.0414653		300.701	1.60457	0.370455		1014.08	1.71361	-0.00169982		884.386	2.37675	0.0210584		310.641	1.48307	0.208915		992.946	1.9877	0.01915		248.909	1.48198	0.90797		228.357	1.3033	0.564741		226.24	1.47954	0.41473
227.046	1.61258	0.40525		227.046	1.48996	0.53468		227.046	1.45454	0.53402		301.502	1.67433	0.04204		301.401	1.60592	0.370332		1011.78	1.71389	-0.00169499		883.062	2.37893	0.0213142		311.281	1.48294	0.210711		989.927	1.98807	0.01909		249.854	1.49434	0.91822		229.134	1.30656	0.56326		227.05	1.48363	0.41461
227.855	1.62071	0.39578		227.855	1.50154	0.51378		227.855	1.46223	0.53779		302.252	1.67335	0.0426113		302.102	1.60727	0.370192		1009.49	1.71417	-0.00168996		881.742	2.38113	0.021572		311.922	1.48283	0.212529		986.926	1.98845	0.01903		250.806	1.50727	0.92828		229.912	1.31012	0.56174		227.86	1.48756	0.41432
228.664	1.62767	0.38558		228.664	1.5103	0.49462		228.664	1.47019	0.5412		303.003	1.67237	0.0431793		302.803	1.60861	0.370036		1007.2	1.71444	-0.00168473		880.426	2.38335	0.0218318		312.563	1.48273	0.214368		983.943	1.98883	0.01897		251.766	1.52078	0.93811		230.689	1.31397	0.560137		228.67	1.49132	0.41387
229.473	1.63336	0.37483		229.473	1.51683	0.47716		229.473	1.47842	0.54422		303.754	1.6714	0.0437442		303.504	1.60996	0.369864		1004.93	1.71472	-0.0016793		879.114	2.38558	0.0220936		313.203	1.48265	0.21623		980.978	1.98922	0.01891		252.733	1.53489	0.94769		231.467	1.3181	0.558406		229.48	1.49492	0.41328
230.282	1.63776	0.36373		230.282	1.5216	0.46132		230.282	1.48688	0.54682		304.505	1.67043	0.0443058		304.204	1.6113	0.369676		1002.67	1.715	-0.00167366		877.806	2.38784	0.0223573		313.844	1.4826	0.218115		978.031	1.98962	0.01884		253.708	1.54961	0.95697		232.244	1.32247	0.556503		230.29	1.49834	0.41256
231.091	1.64084	0.35246		231.091	1.52498	0.44698		231.091	1.49554	0.54896		305.255	1.66946	0.0448644		304.905	1.61264	0.36947		1000.42	1.71528	-0.00166783		876.502	2.39011	0.0226231		314.484	1.48257	0.220023		975.102	1.99002	0.01878		254.69	1.56494	0.9659		233.022	1.32706	0.55438		231.1	1.50158	0.41173
231.9	1.64264	0.3412		231.9	1.52727	0.43401		231.9	1.50437	0.55061		306.006	1.6685	0.0454199		305.606	1.61398	0.369248		998.179	1.71557	-0.00166179		875.201	2.39241	0.0228909		315.125	1.48256	0.221954		972.19	1.99043	0.01871		255.679	1.58088	0.97444		233.799	1.33183	0.551992		231.91	1.50464	0.4108
232.709	1.64321	0.33013		232.709	1.5287	0.42228		232.709	1.51334	0.55176		306.757	1.66754	0.0459725		306.306	1.61532	0.36901		995.948	1.71585	-0.00165554		873.905	2.39472	0.0231606		315.766	1.48258	0.223909		969.296	1.99084	0.01864		256.677	1.59744	0.98255		234.577	1.33675	0.549294		232.72	1.50752	0.40979
233.518	1.64264	0.31939		233.518	1.52943	0.41169		233.518	1.5224	0.55236		307.508	1.66659	0.0465222		307.007	1.61665	0.368754		993.727	1.71613	-0.00164908		872.612	2.39705	0.0234323		316.406	1.48262	0.225889		966.418	1.99127	0.01856		257.682	1.61462	0.99018		235.354	1.34178	0.546241		233.53	1.51022	0.40871
234.327	1.64103	0.30911		234.327	1.52962	0.40211		234.327	1.5315	0.55242		308.258	1.66564	0.047069		307.708	1.61799	0.368481		991.516	1.71642	-0.00164241		871.323	2.39941	0.0237059		317.047	1.4827	0.227892		963.558	1.9917	0.01849		258.695	1.63241	0.99726		236.132	1.34686	0.542793		234.34	1.51274	0.40757
235.136	1.63848	0.29938		235.136	1.52937	0.39345		235.136	1.5406	0.5519		309.009	1.66469	0.0476131		308.408	1.61932	0.368192		989.314	1.7167	-0.00163553		870.038	2.40178	0.0239815		317.688	1.4828	0.229921		960.715	1.99213	0.01841		259.716	1.65081	1.00374		236.909	1.35192	0.538913		235.15	1.51508	0.40638
235.945	1.63512	0.29028		235.945	1.52878	0.38563		235.945	1.54963	0.55081		309.76	1.66375	0.0481544		309.109	1.62064	0.367885		987.123	1.71699	-0.00162844		868.757	2.40418	0.0242589		318.328	1.48293	0.231974		957.888	1.99258	0.01833		260.746	1.66979	1.00957		237.687	1.35691	0.534573		235.96	1.51724	0.40516
236.754	1.63106	0.28185		236.754	1.5279	0.37855		236.754	1.55855	0.54914		310.511	1.66281	0.0486931		309.81	1.62197	0.36756		984.941	1.71728	-0.00162114		867.479	2.40659	0.0245383		318.969	1.4831	0.234052		955.078	1.99303	0.01825		261.783	1.68933	1.01468		238.464	1.36173	0.52975		236.77	1.51923	0.40392
237.563	1.62642	0.27414		237.563	1.52681	0.37215		237.563	1.5673	0.54691		311.261	1.66187	0.0492292		310.511	1.62329	0.367218		982.768	1.71757	-0.00161361		866.205	2.40903	0.0248195		319.61	1.48331	0.236156		952.284	1.99348	0.01816		262.829	1.70942	1.01901		239.242	1.36631	0.524436		237.58	1.52106	0.40267
238.372	1.6213	0.26714		238.372	1.52555	0.36636		238.372	1.57582	0.54411		312.012	1.66094	0.0497627		311.211	1.6246	0.366858		980.606	1.71786	-0.00160587		864.935	2.41149	0.0251025		320.25	1.48355	0.238284		949.507	1.99395	0.01808		263.883	1.73002	1.0225		240.019	1.37054	0.518636		238.39	1.52272	0.40141
239.181	1.61581	0.26086		239.181	1.52414	0.36114		239.181	1.58406	0.54078		312.763	1.66001	0.0502938		311.912	1.62592	0.366481		978.452	1.71815	-0.00159791		863.669	2.41397	0.0253874		320.891	1.48383	0.240437		946.746	1.99442	0.01799		264.946	1.75108	1.02507		240.797	1.37435	0.512369		239.2	1.52422	0.40016
239.99	1.61004	0.25528		239.99	1.52263	0.35642		239.99	1.59196	0.53693		313.514	1.65908	0.0508224		312.613	1.62723	0.366085		976.309	1.71844	-0.00158972		862.406	2.41648	0.025674		321.532	1.48416	0.242615		944.001	1.9949	0.01791		266.017	1.77255	1.02667		241.574	1.37762	0.505676		240.01	1.52557	0.39892
240.799	1.60405	0.25038		240.799	1.52103	0.35216		240.799	1.59948	0.53261		314.264	1.65816	0.0513487		313.313	1.62853	0.365672		974.174	1.71874	-0.00158132		861.147	2.419	0.0259624		322.172	1.48453	0.244818		941.271	1.99538	0.01782		267.097	1.79438	1.02722		242.352	1.38027	0.498615		240.82	1.52677	0.39771
241.608	1.59794	0.24613		241.608	1.51936	0.34833		241.608	1.60656	0.52785		315.015	1.65724	0.0518727		314.014	1.62984	0.36524		972.049	1.71903	-0.00157269		859.892	2.42156	0.0262524		322.813	1.48495	0.247044		938.558	1.99588	0.01773		268.185	1.81649	1.02668		243.129	1.3822	0.491266		241.63	1.52782	0.39653
242.417	1.59174	0.2425		242.417	1.51765	0.34488		242.417	1.61318	0.5227		315.766	1.65632	0.0523943		314.715	1.63114	0.36479		969.933	1.71933	-0.00156383		858.64	2.42413	0.0265442		323.453	1.48542	0.249293		935.86	1.99638	0.01764		269.283	1.83881	1.02498		243.907	1.38335	0.483727		242.44	1.52874	0.39538
243.226	1.58552	0.23945		243.226	1.5159	0.3418		243.226	1.61929	0.51721		316.517	1.65541	0.0529138		315.415	1.63243	0.364321		967.827	1.71962	-0.00155474		857.392	2.42673	0.0268375		324.094	1.48594	0.251565		933.177	1.99689	0.01755		270.39	1.86124	1.02206		244.684	1.38366	0.476112		243.25	1.52953	0.39427
244.035	1.57932	0.23694		244.035	1.51412	0.33904		244.035	1.62487	0.51143		317.267	1.6545	0.0534311		316.116	1.63372	0.363833		965.729	1.71992	-0.00154543		856.148	2.42936	0.0271324		324.735	1.48652	0.253858		930.51	1.9974	0.01746		271.505	1.8837	1.0179		245.462	1.3831	0.468547		244.06	1.5302	0.39322
244.844	1.57317	0.23493		244.844	1.51233	0.33659		244.844	1.62991	0.50542		318.018	1.65359	0.0539464		316.817	1.635	0.363326		963.641	1.72022	-0.00153588		854.907	2.432	0.0274289		325.375	1.48717	0.25617		927.858	1.99793	0.01736		272.63	1.90606	1.01244		246.239	1.38166	0.461168		244.87	1.53074	0.39221
245.653	1.5671	0.2334		245.653	1.51052	0.33442		245.653	1.63439	0.49924		318.769	1.65269	0.0544595		317.518	1.63629	0.3628		961.561	1.72052	-0.0015261		853.67	2.43468	0.0277268		326.016	1.48788	0.2585		925.221	1.99846	0.01727		273.765	1.92822	1.00567		247.017	1.37936	0.45411		245.68	1.53117	0.39126
246.462	1.56113	0.23229		246.462	1.50871	0.33251		246.462	1.6383	0.49294		319.52	1.65178	0.0549707		318.218	1.63756	0.362255		959.491	1.72082	-0.00151609		852.436	2.43738	0.0280261		326.657	1.48866	0.260845		922.599	1.999	0.01718		274.909	1.95004	0.99757		247.794	1.37624	0.447503		246.49	1.5315	0.39037
247.271	1.55529	0.23158		247.271	1.50691	0.33084		247.271	1.64165	0.48658		320.27	1.65089	0.0554799		318.919	1.63883	0.36169		957.429	1.72113	-0.00150584		851.206	2.44011	0.0283268		327.297	1.48951	0.263203		919.992	1.99954	0.01708		276.062	1.9714	0.98815		248.572	1.37237	0.441466		247.3	1.53172	0.38954
248.08	1.54958	0.23125		248.08	1.50511	0.32941		248.08	1.64445	0.48022		321.021	1.64999	0.0559872		319.62	1.6401	0.361105		955.376	1.72143	-0.00149535		849.979	2.44287	0.0286288		327.938	1.49045	0.265571		917.4	2.0001	0.01699		277.225	1.99216	0.97743		249.35	1.36784	0.436103		248.11	1.53184	0.38878
248.889	1.54401	0.23124		248.889	1.50332	0.32818		248.889	1.64672	0.47389		321.772	1.6491	0.0564927		320.32	1.64136	0.360499		953.332	1.72174	-0.00148462		848.756	2.44565	0.028932		328.579	1.49146	0.267944		914.822	2.00066	0.01689		278.398	2.01218	0.96544		250.127	1.36276	0.431496		248.92	1.53188	0.38808
249.698	1.5386	0.23155		249.698	1.50154	0.32716		249.698	1.64847	0.46765		322.523	1.64821	0.0569963		321.021	1.64261	0.359874		951.297	1.72204	-0.00147365		847.537	2.44846	0.0292363		329.219	1.49256	0.270318		912.258	2.00123	0.0168		279.581	2.03132	0.95223		250.905	1.35725	0.427705		249.73	1.53183	0.38746
250.507	1.53334	0.23214		250.507	1.49978	0.32632		250.507	1.64972	0.46155		323.273	1.64732	0.0574982		321.722	1.64386	0.359227		949.27	1.72235	-0.00146243		846.321	2.45131	0.0295418		329.86	1.49376	0.272688		909.709	2.00181	0.0167		280.774	2.04946	0.93789		251.682	1.35142	0.424767		250.54	1.5317	0.38691
251.316	1.52824	0.23299		251.316	1.49803	0.32566		251.316	1.65052	0.45561		324.024	1.64644	0.0579984		322.422	1.6451	0.35856		947.253	1.72266	-0.00145097		845.108	2.45418	0.0298483		330.501	1.49505	0.275048		907.174	2.0024	0.01661		281.978	2.06646	0.92251		252.46	1.3454	0.422696		251.35	1.53149	0.38644
252.125	1.52331	0.23408		252.125	1.4963	0.32517		252.125	1.65088	0.44988		324.775	1.64556	0.058497		323.123	1.64634	0.357871		945.243	1.72297	-0.00143927		843.899	2.45708	0.0301557		331.141	1.49644	0.27739		904.653	2.00299	0.01651		283.191	2.08221	0.90619		253.237	1.33931	0.421486		252.16	1.53122	0.38604
252.934	1.51854	0.23539		252.934	1.4946	0.32483		252.934	1.65085	0.44437		325.526	1.64468	0.0589939		323.824	1.64757	0.35716		943.242	1.72328	-0.00142731		842.694	2.46001	0.0304639		331.782	1.49794	0.279707		902.147	2.00359	0.01642		284.416	2.0966	0.88906		254.015	1.33324	0.421112		252.97	1.53088	0.38572
253.743	1.51393	0.23689		253.743	1.49291	0.32464		253.743	1.65045	0.43912		326.276	1.6438	0.0594892		324.525	1.64879	0.356427		941.25	1.72359	-0.00141511		841.492	2.46298	0.030773		332.422	1.49954	0.281989		899.654	2.00421	0.01633		285.65	2.10954	0.87127		254.792	1.3273	0.421537		253.78	1.53049	0.38548
254.552	1.50949	0.23858		254.552	1.49125	0.3246		254.552	1.64972	0.43413		327.027	1.64293	0.0599831		325.225	1.65001	0.355672		939.266	1.7239	-0.00140265		840.293	2.46598	0.0310827		333.063	1.50125	0.284227		897.174	2.00482	0.01623		286.896	2.12096	0.85298		255.57	1.32157	0.42271		254.59	1.53003	0.38532
255.361	1.5052	0.24044		255.361	1.48961	0.32469		255.361	1.64869	0.42944		327.778	1.64206	0.0604754		325.926	1.65122	0.354894		937.29	1.72422	-0.00138994		839.098	2.46901	0.0313931		333.704	1.50308	0.286407		894.709	2.00545	0.01614		288.152	2.13081	0.83435		256.347	1.31612	0.424576		255.4	1.52953	0.38524
256.17	1.50107	0.24245		256.17	1.488	0.32491		256.17	1.64741	0.42504		328.529	1.64119	0.0609663		326.627	1.65242	0.354092		935.323	1.72453	-0.00137697		837.906	2.47207	0.031704		334.344	1.50502	0.288519		892.257	2.00609	0.01605		289.42	2.13906	0.81556		257.125	1.311	0.427072		256.21	1.52898	0.38524
256.979	1.49709	0.24461		256.979	1.48642	0.32525		256.979	1.64589	0.42094		329.279	1.64033	0.0614558		327.327	1.65362	0.353267		933.363	1.72485	-0.00136375		836.717	2.47517	0.0320153		334.985	1.50708	0.290549		889.818	2.00673	0.01596		290.699	2.1457	0.79678		257.902	1.30628	0.430136		257.02	1.52839	0.38532
257.788	1.49326	0.2469		257.788	1.48486	0.32571		257.788	1.64417	0.41714		330.03	1.63946	0.061944		328.028	1.6548	0.352417		931.413	1.72517	-0.00135026		835.532	2.47831	0.032327		335.626	1.50924	0.292481		887.393	2.00738	0.01587		291.989	2.15074	0.77819		258.68	1.30196	0.433704		257.83	1.52776	0.38549
258.597	1.48957	0.2493		258.597	1.48333	0.32629		258.597	1.64229	0.41365		330.781	1.6386	0.0624309		328.729	1.65598	0.351543		929.47	1.72549	-0.00133652		834.35	2.48148	0.032639		336.266	1.51151	0.294301		884.98	2.00804	0.01578		293.29	2.15422	0.75998		259.457	1.29809	0.437715		258.64	1.52709	0.38573
259.406	1.48603	0.25182		259.406	1.48183	0.32697		259.406	1.64026	0.41047		331.532	1.63775	0.0629165		329.429	1.65715	0.350643		927.535	1.72581	-0.00132251		833.172	2.48469	0.0329511		336.907	1.51387	0.295992		882.581	2.00871	0.01569		294.604	2.15621	0.7423		260.235	1.29468	0.442111		259.45	1.5264	0.38606
260.215	1.48263	0.25445		260.215	1.48036	0.32776		260.215	1.63812	0.40759		332.282	1.63689	0.0634009		330.13	1.65831	0.349716		925.608	1.72613	-0.00130824		831.997	2.48794	0.0332634		337.548	1.51633	0.29754		880.195	2.00939	0.0156		295.929	2.15677	0.72533		261.012	1.29174	0.446835		260.26	1.52568	0.38647
261.024	1.47937	0.25716		261.024	1.47893	0.32865		261.024	1.63589	0.405		333.033	1.63604	0.0638842		330.831	1.65946	0.348763		923.69	1.72646	-0.0012937		830.825	2.49123	0.0335756		338.188	1.51886	0.298927		877.822	2.01007	0.01551		297.266	2.15601	0.70921		261.79	1.28927	0.451838		261.07	1.52494	0.38695
261.833	1.47624	0.25997		261.833	1.47752	0.32963		261.833	1.63359	0.4027		333.784	1.63519	0.0643663		331.532	1.6606	0.347783		921.779	1.72678	-0.0012789		829.656	2.49456	0.0338879		338.829	1.52145	0.300141		875.461	2.01076	0.01543		298.615	2.15404	0.69409		262.567	1.28727	0.457072		261.88	1.52418	0.38753
262.642	1.47324	0.26286		262.642	1.47614	0.33071		262.642	1.63124	0.40067		334.535	1.63434	0.0648473		332.232	1.66173	0.346774		919.876	1.72711	-0.00126382		828.491	2.49794	0.0342		339.469	1.52407	0.301168		873.113	2.01147	0.01534		299.976	2.151	0.68009		263.345	1.28574	0.462495		262.69	1.5234	0.38818
263.451	1.47037	0.26582		263.451	1.4748	0.33188		263.451	1.62887	0.39892		335.285	1.63349	0.0653273		332.933	1.66285	0.345737		917.981	1.72743	-0.00124848		827.329	2.50135	0.0345119		340.11	1.52672	0.301997		870.778	2.01218	0.01526		301.35	2.14701	0.66732		264.122	1.28466	0.468068		263.5	1.52261	0.38891
264.26	1.46762	0.26886		264.26	1.47349	0.33314		264.26	1.62648	0.39743		336.036	1.63265	0.0658062		333.634	1.66396	0.344669		916.094	1.72776	-0.00123286		826.17	2.50481	0.0348237		340.751	1.52936	0.302622		868.455	2.01289	0.01518		302.737	2.14223	0.65587		264.9	1.28404	0.473756		264.31	1.52182	0.38972
265.069	1.46499	0.27196		265.069	1.47222	0.33449		265.069	1.6241	0.39618		336.787	1.63181	0.0662842		334.334	1.66505	0.343571		914.214	1.72809	-0.00121696		825.015	2.50832	0.0351351		341.391	1.53196	0.30304		866.145	2.01362	0.0151		304.136	2.13684	0.64583		265.677	1.28386	0.479527		265.12	1.52101	0.39061
265.878	1.46248	0.27512		265.878	1.47098	0.33592		265.878	1.62173	0.39517		337.538	1.63097	0.0667613		335.035	1.66614	0.342441		912.342	1.72842	-0.00120079		823.863	2.51188	0.0354462		342.032	1.53451	0.303251		863.846	2.01436	0.01503		305.549	2.13099	0.63726		266.455	1.28412	0.485353		265.93	1.52021	0.39158
266.687	1.46008	0.27834		266.687	1.46978	0.33742		266.687	1.61939	0.39439		338.288	1.63013	0.0672375		335.736	1.6672	0.341278		910.478	1.72876	-0.00118434		822.714	2.51548	0.0357571		342.673	1.53696	0.303264		861.56	2.0151	0.01495		306.974	2.12488	0.6302		267.232	1.28479	0.491207		266.74	1.5194	0.39263
267.496	1.4578	0.28161		267.496	1.46861	0.33901		267.496	1.61709	0.39383		339.039	1.6293	0.0677128		336.436	1.66825	0.340082		908.621	1.72909	-0.00116761		821.568	2.51913	0.0360676		343.313	1.53929	0.303088		859.286	2.01585	0.01488		308.413	2.11867	0.62467		268.01	1.28588	0.497064		267.55	1.5186	0.39375
268.305	1.45563	0.28494		268.305	1.46749	0.34067		268.305	1.61484	0.39348		339.79	1.62847	0.0681874		337.137	1.66929	0.33885		906.772	1.72942	-0.0011506		820.425	2.52284	0.0363778		343.954	1.54147	0.302742		857.024	2.01661	0.01481		309.866	2.11258	0.6207		268.787	1.28738	0.502904		268.36	1.51781	0.39496
269.114	1.45357	0.28831		269.114	1.4664	0.34241		269.114	1.61265	0.39331		340.541	1.62764	0.0686611		337.838	1.67031	0.337582		904.931	1.72976	-0.0011333		819.286	2.5266	0.0366878		344.595	1.54348	0.302247		854.774	2.01738	0.01474		311.332	2.10679	0.61826		269.565	1.28926	0.508703		269.17	1.51702	0.39624
269.923	1.45161	0.29172		269.923	1.46535	0.34422		269.923	1.61053	0.39334		341.291	1.62681	0.0691342		338.539	1.67131	0.336277		903.097	1.7301	-0.00111572		818.149	2.53041	0.0369976		345.235	1.5453	0.30163		852.536	2.01816	0.01467		312.812	2.10151	0.61732		270.342	1.29153	0.514444		269.98	1.51625	0.39759
270.732	1.44976	0.29518		270.732	1.46434	0.3461		270.732	1.60847	0.39353		342.042	1.62599	0.0696065		339.239	1.67229	0.334934		901.27	1.73044	-0.00109785		817.016	2.53428	0.0373073		345.876	1.54691	0.300919		850.309	2.01895	0.0146		314.306	2.09693	0.61784		271.12	1.29417	0.520106		270.79	1.5155	0.39902
271.541	1.44801	0.29868		271.541	1.46338	0.34805		271.541	1.60649	0.39389		342.793	1.62516	0.0700782		339.94	1.67324	0.33355		899.451	1.73078	-0.00107969		815.886	2.53822	0.0376171		346.517	1.54831	0.300147		848.094	2.01975	0.01454		315.815	2.09326	0.61972		271.898	1.29717	0.525672		271.6	1.51476	0.40052
272.35	1.44637	0.30221		272.35	1.46246	0.35007		272.35	1.6046	0.39441		343.544	1.62434	0.0705493		340.641	1.67417	0.332124		897.639	1.73112	-0.00106124		814.759	2.54221	0.037927		347.157	1.54949	0.299346		845.89	2.02055	0.01448		317.338	2.09072	0.62285		272.675	1.30053	0.531123		272.41	1.51404	0.4021
273.159	1.44482	0.30577		273.159	1.46158	0.35216		273.159	1.60279	0.39507		344.294	1.62352	0.0710198		341.341	1.67508	0.330656		895.835	1.73146	-0.00104249		813.635	2.54626	0.0382375		347.798	1.55046	0.298547		843.698	2.02136	0.01442		318.876	2.08949	0.62711		273.453	1.30423	0.536442		273.22	1.51335	0.40375
273.968	1.44337	0.30937		273.968	1.46075	0.35431		273.968	1.60107	0.39587		345.045	1.62271	0.0714897		342.042	1.67595	0.329144		894.037	1.73181	-0.00102345		812.515	2.55038	0.0385486		348.438	1.55121	0.297781		841.517	2.02218	0.01437		320.429	2.08977	0.63232		274.23	1.30827	0.541612		274.03	1.51268	0.40546
274.777	1.44202	0.313		274.777	1.45996	0.35652		274.777	1.59944	0.39679		345.796	1.62189	0.0719592		342.743	1.6768	0.327586		892.247	1.73215	-0.00100412		811.397	2.55457	0.0388608		349.079	1.55177	0.297075		839.348	2.02301	0.01432		321.997	2.09174	0.63827		275.008	1.31263	0.546615		274.84	1.51204	0.40725
275.586	1.44076	0.31666		275.586	1.45922	0.35879		275.586	1.5979	0.39784		346.547	1.62108	0.0724282		343.443	1.6776	0.32598		890.464	1.7325	-0.000984488		810.283	2.55883	0.0391744		349.72	1.55215	0.296454		837.189	2.02385	0.01426		323.581	2.09556	0.64471		275.785	1.31731	0.551434		275.65	1.51143	0.40911
276.395	1.4396	0.32034		276.395	1.45853	0.36113		276.395	1.59647	0.39899		347.297	1.62027	0.0728968		344.144	1.67837	0.324327		888.688	1.73285	-0.000964555		809.171	2.56317	0.0394899		350.36	1.55236	0.295938		835.042	2.0247	0.01422		325.18	2.10136	0.65137		276.563	1.32229	0.556051		276.46	1.51086	0.41103
277.204	1.43853	0.32405		277.204	1.45789	0.36352		277.204	1.59513	0.40025		348.048	1.61946	0.0733649		344.845	1.6791	0.322624		886.919	1.7332	-0.000944322		808.063	2.56758	0.0398078		351.001	1.55244	0.295544		832.906	2.02556	0.01417		326.795	2.10923	0.65792		277.34	1.32756	0.560449		277.27	1.51032	0.41302
278.013	1.43756	0.32778		278.013	1.45731	0.36597		278.013	1.59389	0.40161		348.799	1.61865	0.0738328		345.546	1.67978	0.32087		885.157	1.73355	-0.000923785		806.957	2.57206	0.0401287		351.642	1.55239	0.295283		830.78	2.02642	0.01413		328.427	2.11921	0.664		278.118	1.33311	0.564612		278.08	1.50982	0.41508
278.822	1.43668	0.33153		278.822	1.45677	0.36848		278.822	1.59275	0.40305		349.55	1.61785	0.0743003		346.246	1.6804	0.319065		883.403	1.73391	-0.000902942		805.855	2.57663	0.0404533		352.282	1.55225	0.295164		828.666	2.0273	0.01409		330.074	2.13128	0.66923		278.895	1.33892	0.568523		278.89	1.50937	0.41719
279.631	1.43588	0.3353		279.631	1.45629	0.37104		279.631	1.59171	0.40458		350.3	1.61704	0.0747675		346.947	1.68097	0.317209		881.655	1.73426	-0.000881793		804.755	2.58128	0.0407824		352.923	1.55203	0.295191		826.562	2.02818	0.01405		331.739	2.14535	0.67322		279.673	1.34499	0.572164		279.7	1.50895	0.41937
280.44	1.43518	0.33909		280.44	1.45587	0.37366		280.44	1.59077	0.40619		351.051	1.61624	0.0752345		347.648	1.68147	0.315302		879.914	1.73462	-0.000860336		803.659	2.58602	0.0411171		353.564	1.55176	0.295366		824.469	2.02907	0.01402		333.42	2.16124	0.67557		280.45	1.35128	0.575521		280.51	1.50859	0.42162
281.249	1.43457	0.3429		281.249	1.4555	0.37633		281.249	1.58994	0.40787		351.802	1.61544	0.0757012		348.348	1.68189	0.313343		878.179	1.73498	-0.000838569		802.566	2.59086	0.0414582		354.204	1.55146	0.295687		822.386	2.02997	0.01399		335.118	2.17868	0.67589		281.228	1.35778	0.578579		281.32	1.50827	0.42392
282.058	1.43405	0.34672		282.058	1.45519	0.37905		282.058	1.5892	0.40961		352.553	1.61465	0.0761678		349.049	1.68224	0.311336		876.452	1.73534	-0.000816489		801.475	2.59578	0.0418072		354.845	1.55114	0.296152		820.314	2.03088	0.01396		336.834	2.19731	0.67387		282.005	1.36448	0.581324		282.13	1.50801	0.42628
282.867	1.43362	0.35055		282.867	1.45495	0.38182		282.867	1.58857	0.41141		353.303	1.61385	0.0766343		349.75	1.6825	0.309283		874.732	1.7357	-0.000794096		800.388	2.60081	0.0421652		355.485	1.55081	0.296754		818.252	2.0318	0.01393		338.567	2.2167	0.66923		282.783	1.37135	0.583743		282.94	1.5078	0.42869
283.676	1.43328	0.3544		283.676	1.45476	0.38463		283.676	1.58804	0.41326		354.054	1.61306	0.0771006		350.45	1.68266	0.307186		873.018	1.73606	-0.000771388		799.303	2.60593	0.0425338		356.126	1.5505	0.297487		816.201	2.03273	0.01391		340.318	2.23632	0.6618		283.56	1.37837	0.585825		283.75	1.50764	0.43116
284.485	1.43303	0.35825		284.485	1.45464	0.3875		284.485	1.58761	0.41517		354.805	1.61226	0.0775669		351.151	1.68272	0.305052		871.311	1.73642	-0.000748364		798.222	2.61117	0.0429149		356.767	1.55021	0.298344		814.16	2.03366	0.01389		342.087	2.25565	0.65155		284.338	1.38551	0.587561		284.56	1.50755	0.43368
285.294	1.43286	0.36212		285.294	1.45458	0.39041		285.294	1.58728	0.41711		355.556	1.61148	0.0780332		351.852	1.68266	0.302887		869.61	1.73679	-0.00072502		797.143	2.61651	0.0433102		357.407	1.54996	0.299316		812.129	2.03461	0.01387		343.875	2.2741	0.63855		285.115	1.39276	0.588943		285.37	1.50751	0.43626
286.103	1.43278	0.36599		286.103	1.45459	0.39336		286.103	1.58705	0.4191		356.306	1.61069	0.0784994		352.553	1.68248	0.300699		867.917	1.73716	-0.000701357		796.067	2.62196	0.0437219		358.048	1.54975	0.300395		810.108	2.03556	0.01386		345.682	2.29115	0.62302		285.893	1.40008	0.589966		286.18	1.50754	0.43888
286.912	1.43279	0.36987		286.912	1.45467	0.39635		286.912	1.58692	0.42112		357.057	1.6099	0.0789657		353.253	1.68216	0.2985		866.229	1.73752	-0.000677372		794.994	2.62754	0.0441525		358.689	1.5496	0.301572		808.097	2.03653	0.01385		347.508	2.30634	0.60529		286.67	1.40746	0.590626		286.99	1.50763	0.44155
287.721	1.43289	0.37376		287.721	1.45481	0.39939		287.721	1.58689	0.42318		357.808	1.60912	0.0794321		353.954	1.6817	0.296302		864.549	1.73789	-0.000653063		793.924	2.63324	0.0446046		359.329	1.5495	0.30284		806.096	2.0375	0.01384		349.353	2.31929	0.5858		287.448	1.41485	0.590924		287.8	1.50779	0.44426
288.53	1.43308	0.37765		288.53	1.45503	0.40246		288.53	1.58696	0.42526		358.559	1.60834	0.0798985		354.655	1.68109	0.294121		862.875	1.73827	-0.00062843		792.857	2.63906	0.0450811		359.97	1.54946	0.304189		804.105	2.03848	0.01383		351.218	2.32975	0.56504		288.225	1.42225	0.59086		288.61	1.50803	0.44702
289.339	1.43335	0.38154		289.339	1.45533	0.40557		289.339	1.58712	0.42736		359.309	1.60756	0.0803651		355.355	1.68032	0.291975		861.207	1.73864	-0.00060347		791.793	2.64502	0.0455853		360.611	1.54949	0.305612		802.124	2.03948	0.01383		353.103	2.33762	0.54355		289.003	1.42962	0.590438		289.42	1.50833	0.44982
290.148	1.43371	0.38543		290.148	1.45569	0.40872		290.148	1.58738	0.42949		360.06	1.60678	0.0808319		356.056	1.67939	0.289884		859.546	1.73901	-0.000578182		790.732	2.65112	0.0461208		361.251	1.54959	0.307101		800.152	2.04048	0.01383		355.008	2.3429	0.52185		289.78	1.43693	0.589666		290.23	1.50871	0.45266
290.957	1.43416	0.38931		290.957	1.45614	0.41189		290.957	1.58774	0.43163		360.811	1.606	0.0812988		356.757	1.67831	0.28787		857.891	1.73939	-0.000552565		789.673	2.65736	0.0466916		361.892	1.54976	0.308648		798.191	2.04149	0.01383		356.934	2.34571	0.50039		290.558	1.44417	0.588551		291.04	1.50917	0.45553
291.766	1.43469	0.3932		291.766	1.45666	0.4151		291.766	1.58819	0.43378		361.562	1.60523	0.081766		357.457	1.67708	0.285956		856.242	1.73977	-0.000526617		788.617	2.66374	0.0473019		362.533	1.55	0.310248		796.239	2.04251	0.01383		358.881	2.34627	0.47959		291.335	1.45131	0.587105		291.85	1.5097	0.45844
292.575	1.43532	0.39708		292.575	1.45726	0.41834		292.575	1.58873	0.43594		362.312	1.60445	0.0822335		358.158	1.6757	0.284167		854.6	1.74015	-0.000500336		787.564	2.67028	0.0479566		363.173	1.55032	0.311893		794.296	2.04354	0.01384		360.849	2.34485	0.45977		292.113	1.45832	0.58534		292.66	1.51031	0.46137
293.384	1.43603	0.40095		293.384	1.45795	0.42161		293.384	1.58937	0.4381		363.063	1.60368	0.0827012		358.859	1.67419	0.282527		852.964	1.74053	-0.000473721		786.514	2.67698	0.048661		363.814	1.55071	0.313578		792.363	2.04459	0.01385		362.839	2.34177	0.44117		292.891	1.46519	0.583271		293.47	1.51101	0.46434
294.193	1.43682	0.40481		294.193	1.45872	0.4249		294.193	1.5901	0.44027		363.814	1.60291	0.0831693		359.56	1.67257	0.281055		851.335	1.74091	-0.000446771		785.467	2.68384	0.0494205		364.454	1.55117	0.315297		790.439	2.04564	0.01386		364.851	2.33735	0.42393		293.668	1.47191	0.580915		294.28	1.51179	0.46733
295.002	1.43771	0.40867		295.002	1.45957	0.42821		295.002	1.59092	0.44243		364.565	1.60215	0.0836378		360.26	1.67086	0.279773		849.711	1.7413	-0.000419483		784.422	2.69087	0.0502416		365.095	1.55172	0.317045		788.524	2.0467	0.01388		366.886	2.3319	0.40813		294.446	1.47844	0.578288		295.09	1.51266	0.47034
295.811	1.43868	0.41251		295.811	1.46051	0.43154		295.811	1.59182	0.44459		365.315	1.60138	0.0841067		360.961	1.6691	0.278692		848.094	1.74168	-0.000391858		783.381	2.69808	0.0511309		365.736	1.55233	0.318816		786.619	2.04777	0.01389		368.943	2.32572	0.39379		295.223	1.48479	0.57541		295.9	1.51362	0.47337
296.62	1.43974	0.41634		296.62	1.46154	0.43489		296.62	1.59282	0.44675		366.066	1.60062	0.084576		361.662	1.66731	0.277821		846.483	1.74207	-0.000363893		782.342	2.70547	0.0520957		366.376	1.55303	0.320607		784.723	2.04886	0.01391		371.023	2.31907	0.38087		296.001	1.49093	0.572298		296.71	1.51466	0.47642
297.429	1.44089	0.42015		297.429	1.46266	0.43826		297.429	1.59391	0.44889		366.817	1.59985	0.0850457		362.362	1.66553	0.277162		844.878	1.74246	-0.000335587		781.306	2.71304	0.0531439		367.017	1.55379	0.322412		782.836	2.04996	0.01393		373.127	2.31218	0.36929		296.778	1.49687	0.568973		297.52	1.5158	0.47948
298.238	1.44213	0.42395		298.238	1.46387	0.44163		298.238	1.59508	0.45103		367.568	1.59909	0.0855159		363.063	1.66379	0.276709		843.279	1.74285	-0.000306939		780.272	2.7208	0.054284		367.658	1.55463	0.324229		780.958	2.05106	0.01395		375.256	2.30524	0.35896		297.556	1.50259	0.565454		298.33	1.51703	0.48255
299.047	1.44345	0.42772		299.047	1.46517	0.44502		299.047	1.59634	0.45314		368.318	1.59834	0.0859867		363.764	1.66213	0.27645		841.686	1.74325	-0.000277948		779.241	2.72876	0.0555253		368.298	1.55554	0.326053		779.089	2.05218	0.01397		377.408	2.2984	0.34977		298.333	1.50808	0.561761		299.14	1.51835	0.48563
299.856	1.44486	0.43148		299.856	1.46657	0.44841		299.856	1.59768	0.45524		369.069	1.59758	0.086458		364.464	1.66057	0.276368		840.099	1.74364	-0.000248611		778.213	2.73691	0.0568776		368.939	1.55653	0.327881		777.229	2.05331	0.01399		379.585	2.29178	0.34158		299.111	1.51334	0.557911		299.95	1.51977	0.48871
300.665	1.44636	0.43521		300.665	1.46806	0.45181		300.665	1.5991	0.45732		369.82	1.59683	0.0869299		365.165	1.65913	0.276438		838.518	1.74404	-0.000218929		777.188	2.74528	0.0583515		369.58	1.55758	0.32971		775.378	2.05446	0.01401		381.788	2.28547	0.33427		299.888	1.51838	0.553925		300.76	1.52129	0.49179
301.474	1.44795	0.43892		301.474	1.46965	0.4552		301.474	1.60061	0.45938		370.571	1.59607	0.0874024		365.866	1.65784	0.276633		836.943	1.74444	-0.000188899		776.165	2.75385	0.0599582		370.22	1.5587	0.331536		773.536	2.05562	0.01404		384.016	2.27955	0.32772		300.666	1.52319	0.549819		301.57	1.5229	0.49487
302.283	1.44962	0.44259		302.283	1.47134	0.4586		302.283	1.6022	0.4614		371.321	1.59532	0.0878755		366.567	1.6567	0.276926		835.374	1.74484	-0.000158522		775.145	2.76263	0.0617099		370.861	1.5599	0.333356		771.702	2.05679	0.01406		386.271	2.27404	0.32181		301.443	1.52777	0.54561		302.38	1.52461	0.49794
303.092	1.45138	0.44624		303.092	1.47313	0.46199		303.092	1.60387	0.46341		372.072	1.59458	0.0883493		367.267	1.65573	0.277287		833.811	1.74524	-0.000127795		774.128	2.77164	0.0636193		371.502	1.56116	0.335169		769.878	2.05798	0.01408		388.552	2.26897	0.31642		302.221	1.53212	0.541314		303.19	1.52643	0.50099
303.901	1.45322	0.44986		303.901	1.47502	0.46536		303.901	1.60561	0.46538		372.823	1.59383	0.0888238		367.968	1.65492	0.277688		832.254	1.74564	-9.6717e-05		773.114	2.78086	0.0657		372.142	1.56249	0.336971		768.061	2.05918	0.01411		390.86	2.26434	0.31146		302.998	1.53626	0.536945		304	1.52834	0.50404
304.71	1.45516	0.45344		304.71	1.47702	0.46873		304.71	1.60744	0.46731		373.574	1.59309	0.089299		368.669	1.65426	0.278102		830.702	1.74605	-6.52879e-05		772.102	2.79031	0.0679662		372.783	1.56389	0.338759		766.254	2.0604	0.01413		393.196	2.26016	0.30684		303.776	1.54018	0.532518		304.81	1.53035	0.50706
305.519	1.45718	0.45699		305.519	1.47911	0.47208		305.519	1.60934	0.46921		374.324	1.59234	0.089775		369.369	1.65375	0.278507		829.157	1.74646	-3.35064e-05		771.092	2.79998	0.0704331		373.423	1.56535	0.340531		764.454	2.06163	0.01415		395.56	2.2564	0.30247		304.553	1.54388	0.528045		305.62	1.53247	0.51005
306.328	1.45928	0.46049		306.328	1.48131	0.4754		306.328	1.61131	0.47108		375.075	1.5916	0.0902518		370.07	1.65338	0.278883		827.617	1.74687	-1.37142e-06		770.086	2.80987	0.0731165		374.064	1.56688	0.342286		762.663	2.06289	0.01417		397.953	2.25305	0.29829		305.331	1.54739	0.523537		306.43	1.53468	0.51302
307.137	1.46147	0.46396		307.137	1.48362	0.47871		307.137	1.61336	0.4729		375.826	1.59087	0.0907293		370.771	1.65314	0.279214		826.082	1.74728	3.11178e-05		769.082	2.81999	0.076033		374.705	1.56847	0.34402		760.881	2.06416	0.01419		400.374	2.25007	0.29422		306.108	1.55069	0.519005		307.24	1.537	0.51596
307.946	1.46375	0.46738		307.946	1.48603	0.48198		307.946	1.61548	0.47468		376.577	1.59013	0.0912076		371.471	1.653	0.279486		824.554	1.74769	6.39622e-05		768.08	2.83033	0.0791996		375.345	1.57013	0.345731		759.107	2.06545	0.01421		402.825	2.24743	0.29023		306.886	1.5538	0.514458		308.05	1.53942	0.51886
308.755	1.46611	0.47076		308.755	1.48854	0.48522		308.755	1.61767	0.47642		377.327	1.5894	0.0916869		372.172	1.65296	0.279691		823.031	1.7481	9.71625e-05		767.082	2.8409	0.0826344		375.986	1.57185	0.347418		757.341	2.06677	0.01422		405.307	2.2451	0.28627		307.663	1.55673	0.509903		308.86	1.54194	0.52172
309.564	1.46855	0.47409		309.564	1.49116	0.48843		309.564	1.61992	0.4781		378.078	1.58867	0.0921669		372.873	1.65299	0.279822		821.513	1.74852	0.00013072		766.085	2.85168	0.0863557		376.627	1.57363	0.349077		755.583	2.0681	0.01424		407.819	2.24304	0.2823		308.441	1.55948	0.505349		309.67	1.54456	0.52454
310.373	1.47108	0.47736		310.373	1.49388	0.49159		310.373	1.62225	0.47974		378.829	1.58794	0.0926479		373.574	1.65309	0.279875		820.002	1.74894	0.000164634		765.092	2.86268	0.0903826		377.267	1.57547	0.350708		753.834	2.06947	0.01425		410.363	2.24122	0.2783		309.218	1.56205	0.500801		310.48	1.54728	0.5273
311.182	1.47369	0.48058		311.182	1.49672	0.49471		311.182	1.62464	0.48133		379.58	1.58721	0.0931298		374.274	1.65324	0.279848		818.495	1.74936	0.000198906		764.101	2.87389	0.0947343		377.908	1.57737	0.352308		752.092	2.07086	0.01426		412.938	2.2396	0.27424		309.996	1.56447	0.496266		311.29	1.5501	0.53001
311.991	1.47638	0.48375		311.991	1.49965	0.49778		311.991	1.6271	0.48287		380.33	1.58648	0.0936126		374.975	1.65344	0.27974		816.995	1.74978	0.000233537		763.112	2.8853	0.0994307		378.549	1.57932	0.353875		750.359	2.07228	0.01427		415.546	2.23815	0.27011		310.773	1.56672	0.491747		312.1	1.55302	0.53267
312.8	1.47916	0.48686		312.8	1.50269	0.5008		312.8	1.62962	0.48435		381.081	1.58576	0.0940963		375.676	1.65365	0.279552		815.499	1.75021	0.000268527		762.126	2.8969	0.104492		379.189	1.58134	0.355407		748.633	2.07374	0.01427		418.187	2.23684	0.26589		311.551	1.56883	0.487249		312.91	1.55603	0.53526
313.609	1.48201	0.4899		313.609	1.50584	0.50376		313.609	1.6322	0.48577		381.832	1.58504	0.0945811		376.376	1.65389	0.279287		814.01	1.75064	0.000303877		761.143	2.90869	0.109937		379.83	1.58341	0.356902		746.916	2.07523	0.01428		420.862	2.23563	0.26159		312.328	1.57079	0.482776		313.72	1.55914	0.53778
314.418	1.48494	0.49289		314.418	1.50909	0.50665		314.418	1.63485	0.48713		382.583	1.58432	0.0950668		377.077	1.65414	0.278948		812.525	1.75106	0.000339587		760.162	2.92064	0.115788		380.47	1.58554	0.358358		745.206	2.07675	0.01428		423.572	2.2345	0.2572		313.106	1.57262	0.47833		314.53	1.56235	0.54023
315.227	1.48795	0.4958		315.227	1.51244	0.50948		315.227	1.63755	0.48843		383.333	1.58361	0.0955535		377.778	1.65439	0.278537		811.047	1.7515	0.000375657		759.184	2.93275	0.122063		381.111	1.58773	0.359773		743.504	2.07832	0.01429		426.316	2.23342	0.25271		313.884	1.57431	0.473914		315.34	1.56564	0.54261
316.036	1.49104	0.49865		316.036	1.5159	0.51223		316.036	1.6403	0.48967		384.084	1.5829	0.0960412		378.478	1.65464	0.278058		809.573	1.75193	0.000412088		758.208	2.94501	0.128783		381.752	1.58997	0.361146		741.81	2.07994	0.01429		429.097	2.23237	0.24814		314.661	1.57587	0.46953		316.15	1.56903	0.5449
316.845	1.4942	0.50142		316.845	1.51945	0.51491		316.845	1.64311	0.49084		384.835	1.58219	0.0965299		379.179	1.65487	0.277516		808.105	1.75236	0.000448879		757.235	2.95739	0.135966		382.392	1.59226	0.362474		740.124	2.08161	0.01431		431.913	2.23133	0.24348		315.439	1.57731	0.465179		316.96	1.57251	0.54711
317.654	1.49743	0.50412		317.654	1.52311	0.5175		317.654	1.64598	0.49194		385.586	1.58148	0.0970196		379.88	1.65509	0.276914		806.642	1.7528	0.000486032		756.264	2.96987	0.143632		383.033	1.5946	0.363756		738.445	2.08333	0.01433		434.768	2.23028	0.23875		316.216	1.57864	0.460862		317.77	1.57607	0.54923
318.463	1.50074	0.50675		318.463	1.52686	0.52001		318.463	1.64889	0.49297		386.336	1.58078	0.0975104		380.581	1.6553	0.276255		805.184	1.75324	0.000523545		755.295	2.98244	0.151796		383.674	1.597	0.364989		736.774	2.08511	0.01436		437.66	2.2292	0.23395		316.994	1.57985	0.456582		318.58	1.57971	0.55125
319.272	1.50412	0.50929		319.272	1.5307	0.52242		319.272	1.65185	0.49394		387.087	1.58007	0.0980022		381.281	1.65548	0.275545		803.732	1.75368	0.00056142		754.33	2.99507	0.160478		384.314	1.59944	0.366171		735.11	2.08696	0.01441		440.59	2.22809	0.22909		317.771	1.58096	0.452338		319.39	1.58343	0.55318
320.081	1.50757	0.51175		320.081	1.53464	0.52474		320.081	1.65486	0.49482		387.838	1.57938	0.0984951		381.982	1.65563	0.274785		802.285	1.75412	0.000599655		753.366	3.00773	0.169691		384.955	1.60194	0.367302		733.454	2.08887	0.01448		443.561	2.22692	0.22418		318.549	1.58196	0.448131		320.2	1.58723	0.555
320.89	1.51108	0.51412		320.89	1.53867	0.52696		320.89	1.65792	0.49564		388.589	1.57868	0.098989		382.683	1.65576	0.273981		800.843	1.75457	0.000638251		752.405	3.02041	0.17945		385.596	1.60448	0.368378		731.805	2.09087	0.01459		446.571	2.2257	0.21922		319.326	1.58286	0.443962		321.01	1.5911	0.55672
321.699	1.51466	0.51641		321.699	1.54278	0.52907		321.699	1.66101	0.49637		389.339	1.57799	0.0994839		383.383	1.65586	0.273135		799.406	1.75502	0.000677207		751.447	3.03308	0.189768		386.236	1.60707	0.369398		730.164	2.09293	0.01473		449.623	2.2244	0.21424		320.104	1.58367	0.439831		321.82	1.59504	0.55833
322.508	1.5183	0.5186		322.508	1.54698	0.53107		322.508	1.66415	0.49703		390.09	1.5773	0.0999799		384.084	1.65593	0.272251		797.975	1.75546	0.000716524		750.491	3.04569	0.200655		386.877	1.6097	0.37036		728.53	2.09509	0.01493		452.717	2.22304	0.20924		320.881	1.58438	0.435737		322.63	1.59905	0.55983
323.317	1.52201	0.52071		323.317	1.55126	0.53296		323.317	1.66732	0.49761		390.841	1.57661	0.100477		384.785	1.65597	0.27133		796.548	1.75592	0.0007562		749.537	3.05824	0.212121		387.518	1.61238	0.371263		726.904	2.09732	0.01519		455.853	2.22159	0.20422		321.659	1.585	0.431683		323.44	1.60312	0.56121
324.126	1.52577	0.52271		324.126	1.55562	0.53473		324.126	1.67053	0.49811		391.592	1.57593	0.100975		385.485	1.65597	0.270378		795.127	1.75637	0.000796235		748.586	3.07067	0.224172		388.158	1.6151	0.372103		725.284	2.09964	0.01553		459.034	2.22006	0.1992		322.436	1.58553	0.427666		324.25	1.60724	0.56247
324.935	1.52958	0.52462		324.935	1.56004	0.53637		324.935	1.67378	0.49852		392.342	1.57525	0.101474		386.186	1.65594	0.269395		793.711	1.75683	0.000836628		747.637	3.08297	0.236813		388.799	1.61786	0.37288		723.672	2.10204	0.01597		462.259	2.21844	0.1942		323.214	1.58598	0.423688		325.06	1.61142	0.5636
325.744	1.53345	0.52642		325.744	1.56454	0.53789		325.744	1.67705	0.49885		393.093	1.57457	0.101974		386.887	1.65587	0.268385		792.299	1.75729	0.00087738		746.691	3.0951	0.250047		389.439	1.62067	0.373591		722.067	2.10451	0.01652		465.529	2.21674	0.1892		323.991	1.58634	0.419749		325.87	1.61565	0.56461
326.553	1.53738	0.52813		326.553	1.5691	0.53928		326.553	1.68035	0.49909		393.844	1.5739	0.102475		387.588	1.65577	0.267349		790.893	1.75775	0.000918488		745.747	3.10702	0.263874		390.08	1.6235	0.374235		720.469	2.10704	0.01721		468.847	2.21496	0.18423		324.769	1.58663	0.415847		326.68	1.61992	0.56548
327.362	1.54134	0.52973		327.362	1.57372	0.54052		327.362	1.68368	0.49924		394.595	1.57323	0.102977		388.288	1.65563	0.26629		789.492	1.75821	0.000959952		744.805	3.1187	0.278291		390.721	1.62638	0.37481		718.878	2.10962	0.01804		472.212	2.21309	0.1793		325.546	1.58683	0.411985		327.49	1.62423	0.56623
328.171	1.54536	0.53121		328.171	1.5784	0.54163		328.171	1.68703	0.4993		395.345	1.57256	0.103479		388.989	1.65546	0.265211		788.095	1.75867	0.00100177		743.866	3.13011	0.293295		391.361	1.62929	0.375314		717.294	2.11223	0.01904		475.625	2.21113	0.1744		326.324	1.58696	0.408161		328.3	1.62857	0.56684
328.98	1.54941	0.53259		328.98	1.58313	0.5426		328.98	1.6904	0.49928		396.096	1.5719	0.103983		389.69	1.65525	0.264112		786.704	1.75914	0.00104394		742.929	3.14121	0.308877		392.002	1.63223	0.375744		715.717	2.11484	0.02022		479.088	2.20909	0.16955		327.101	1.58702	0.404375		329.11	1.63294	0.56731
329.789	1.55351	0.53386		329.789	1.5879	0.54342		329.789	1.69379	0.49916		396.847	1.57125	0.104487		390.39	1.65501	0.262995		785.318	1.75961	0.00108647		741.995	3.15196	0.325029		392.643	1.6352	0.376101		714.147	2.11741	0.02158		482.603	2.20698	0.16475		327.879	1.587	0.400628		329.92	1.63733	0.56764
330.598	1.55764	0.53501		330.598	1.59271	0.54409		330.598	1.6972	0.49895		397.598	1.57059	0.104992		391.091	1.65472	0.261863		783.936	1.76008	0.00112934		741.062	3.16235	0.341737		393.283	1.63821	0.37638		712.584	2.11992	0.02311		486.169	2.20479	0.16		328.656	1.58691	0.396919		330.73	1.64174	0.56784
331.407	1.5618	0.53604		331.407	1.59755	0.5446		331.407	1.70061	0.49865		398.348	1.56994	0.105498		391.792	1.6544	0.260717		782.559	1.76056	0.00117257		740.133	3.17232	0.358989		393.924	1.64124	0.376582		711.028	2.12234	0.02482		489.788	2.20252	0.15532		329.434	1.58676	0.393249		331.54	1.64616	0.56789
332.216	1.56599	0.53696		332.216	1.60242	0.54497		332.216	1.70404	0.49825		399.099	1.5693	0.106004		392.492	1.65405	0.259558		781.187	1.76104	0.00121614		739.205	3.18185	0.376766		394.565	1.64429	0.376704		709.478	2.12463	0.02667		493.461	2.20018	0.1507		330.211	1.58653	0.389618		332.35	1.65058	0.5678
333.025	1.57021	0.53775		333.025	1.60731	0.54517		333.025	1.70747	0.49775		399.85	1.56866	0.106511		393.193	1.65365	0.258387		779.82	1.76152	0.00126006		738.28	3.19092	0.39505		395.205	1.64736	0.376744		707.936	2.12678	0.02865		497.19	2.19778	0.14616		330.989	1.58624	0.386025		333.16	1.65501	0.56756
333.834	1.57444	0.53843		333.834	1.61222	0.54522		333.834	1.71091	0.49716		400.601	1.56802	0.107019		393.894	1.65323	0.257206		778.458	1.762	0.00130433		737.357	3.19948	0.41382		395.846	1.65046	0.376702		706.4	2.12875	0.03072		500.976	2.19532	0.14168		331.766	1.58588	0.382471		333.97	1.65943	0.56718
334.643	1.57869	0.53898		334.643	1.61713	0.5451		334.643	1.71434	0.49647		401.351	1.56739	0.107527		394.595	1.65276	0.256017		777.1	1.76248	0.00134893		736.437	3.20752	0.433053		396.486	1.65357	0.376574		704.87	2.13055	0.03285		504.82	2.19279	0.13728		332.544	1.58546	0.378956		334.78	1.66384	0.56665
335.452	1.58296	0.5394		335.452	1.62205	0.54482		335.452	1.71778	0.49569		402.102	1.56677	0.108035		395.295	1.65226	0.254819		775.747	1.76297	0.00139388		735.518	3.21501	0.452723		397.127	1.6567	0.376361		703.347	2.13217	0.03501		508.723	2.19022	0.13296		333.321	1.58497	0.37548		335.59	1.66823	0.56598
336.261	1.58723	0.5397		336.261	1.62696	0.54438		336.261	1.7212	0.4948		402.853	1.56615	0.108543		395.996	1.65172	0.253615		774.399	1.76346	0.00143916		734.602	3.22191	0.472805		397.768	1.65984	0.37606		701.831	2.13362	0.03715		512.687	2.18759	0.12871		334.099	1.58443	0.372044		336.4	1.67259	0.56516
337.07	1.59151	0.53987		337.07	1.63186	0.54377		337.07	1.72462	0.49382		403.604	1.56553	0.109051		396.697	1.65114	0.252405		773.056	1.76395	0.00148478		733.689	3.22822	0.493271		398.408	1.663	0.37567		700.321	2.13492	0.03926		516.713	2.18491	0.12455		334.876	1.58382	0.368647		337.21	1.67693	0.5642
337.879	1.59579	0.53991		337.879	1.63673	0.543		337.879	1.72802	0.49274		404.354	1.56492	0.109559		397.397	1.65053	0.251191		771.717	1.76445	0.00153073		732.777	3.23391	0.514091		399.049	1.66616	0.37519		698.818	2.13609	0.04131		520.803	2.18219	0.12047		335.654	1.58316	0.365289		338.02	1.68123	0.56309
338.688	1.60007	0.53982		338.688	1.64159	0.54206		338.688	1.73141	0.49155		405.105	1.56432	0.110067		398.098	1.64988	0.249973		770.383	1.76494	0.00157701		731.868	3.23896	0.535235		399.69	1.66932	0.374618		697.321	2.13714	0.04329		524.959	2.17944	0.11647		336.432	1.58243	0.361972		338.83	1.68548	0.56184
339.497	1.60434	0.53961		339.497	1.64641	0.54095		339.497	1.73478	0.49027		405.856	1.56372	0.110575		398.799	1.6492	0.248752		769.053	1.76544	0.00162362		730.961	3.24335	0.556672		400.33	1.67248	0.373954		695.831	2.13811	0.04518		529.181	2.17664	0.11256		337.209	1.58165	0.358694		339.64	1.68969	0.56046
340.306	1.60859	0.53926		340.306	1.65119	0.53969		340.306	1.73813	0.48889		406.607	1.56312	0.111082		399.499	1.64848	0.247529		767.728	1.76595	0.00167055		730.057	3.24707	0.57837		400.971	1.67565	0.373196		694.347	2.139	0.04699		533.471	2.17382	0.10873		337.987	1.58082	0.355457		340.45	1.69385	0.55893
341.115	1.61283	0.53878		341.115	1.65592	0.53826		341.115	1.74145	0.48741		407.357	1.56254	0.111588		400.2	1.64772	0.246305		766.408	1.76645	0.0017178		729.154	3.25011	0.600295		401.612	1.67881	0.372344		692.869	2.13985	0.0487		537.832	2.17096	0.10498		338.764	1.57993	0.352261		341.26	1.69795	0.55726
341.924	1.61704	0.53817		341.924	1.66059	0.53667		341.924	1.74474	0.48584		408.108	1.56196	0.112093		400.901	1.64693	0.24508		765.092	1.76696	0.00176537		728.254	3.25245	0.622416		402.252	1.68196	0.371395		691.398	2.14067	0.05034		542.265	2.16808	0.10132		339.542	1.57898	0.349105		342.07	1.70198	0.55546
342.733	1.62123	0.53743		342.733	1.66521	0.53492		342.733	1.748	0.48416		408.859	1.56138	0.112597		401.602	1.6461	0.243856		763.78	1.76747	0.00181325		727.356	3.2541	0.644698		402.893	1.6851	0.370351		689.933	2.14147	0.05189		546.771	2.16518	0.09774		340.319	1.57799	0.34599		342.88	1.70594	0.55353
343.542	1.62539	0.53655		343.542	1.66976	0.53301		343.542	1.75122	0.48239		409.61	1.56082	0.1131		402.302	1.64524	0.242633		762.473	1.76798	0.00186144		726.46	3.25504	0.667109		403.534	1.68822	0.36921		688.473	2.14227	0.05338		551.353	2.16226	0.09425		341.097	1.57694	0.342917		343.69	1.70983	0.55147
344.351	1.62951	0.53555		344.351	1.67423	0.53094		344.351	1.7544	0.48051		410.36	1.56026	0.113601		403.003	1.64434	0.241412		761.171	1.7685	0.00190993		725.567	3.25526	0.689614		404.174	1.69133	0.367971		687.021	2.14308	0.0548		556.013	2.15932	0.09083		341.874	1.57584	0.339885		344.5	1.71363	0.54928
345.16	1.63359	0.53442		345.16	1.67862	0.52873		345.16	1.75754	0.47854		411.111	1.5597	0.1141		403.704	1.64341	0.240194		759.873	1.76902	0.00195873		724.675	3.25478	0.71218		404.815	1.69442	0.366635		685.574	2.1439	0.05616		560.751	2.15637	0.0875		342.652	1.57469	0.336895		345.31	1.71735	0.54697
345.969	1.63762	0.53316		345.969	1.68293	0.52636		345.969	1.76064	0.47648		411.862	1.55916	0.114597		404.404	1.64244	0.238979		758.579	1.76954	0.00200782		723.786	3.25357	0.734775		405.455	1.69748	0.3652		684.133	2.14474	0.05748		565.571	2.15341	0.08425		343.429	1.5735	0.333946		346.12	1.72098	0.54454
346.778	1.6416	0.53177		346.778	1.68714	0.52385		346.778	1.76368	0.47432		412.613	1.55862	0.115092		405.105	1.64143	0.237768		757.29	1.77007	0.0020572		722.899	3.25166	0.757365		406.096	1.70052	0.363667		682.699	2.1456	0.05876		570.475	2.15044	0.08107		344.207	1.57225	0.33104		346.93	1.72452	0.54199
347.587	1.64553	0.53025		347.587	1.69124	0.5212		347.587	1.76668	0.47207		413.363	1.55809	0.115583		405.806	1.64039	0.236561		756.005	1.77059	0.00210687		722.014	3.24904	0.779918		406.737	1.70352	0.362036		681.27	2.14649	0.06001		575.465	2.14747	0.07798		344.984	1.57097	0.328176		347.74	1.72795	0.53933
348.396	1.6494	0.52861		348.396	1.69525	0.51841		348.396	1.76961	0.46972		414.114	1.55757	0.116071		406.507	1.63932	0.235359		754.725	1.77113	0.00215683		721.132	3.24571	0.802403		407.377	1.70649	0.360307		679.847	2.14741	0.06124		580.543	2.14449	0.07496		345.762	1.56963	0.325355		348.55	1.73128	0.53657
349.205	1.6532	0.52685		349.205	1.69914	0.51549		349.205	1.77249	0.46728		414.865	1.55705	0.116556		407.207	1.63821	0.234164		753.449	1.77166	0.00220706		720.251	3.24168	0.824789		408.018	1.70941	0.35848		678.431	2.14835	0.06244		585.711	2.14151	0.07202		346.539	1.56825	0.322576		349.36	1.73451	0.5337
350.014	1.65693	0.52497		350.014	1.70291	0.51244		350.014	1.7753	0.46476		415.616	1.55655	0.117036		407.908	1.63706	0.232975		752.177	1.7722	0.00225756		719.373	3.23697	0.847044		408.659	1.7123	0.356555		677.02	2.14933	0.06364		590.971	2.13853	0.06915		347.317	1.56683	0.31984		350.17	1.73762	0.53073
350.823	1.66059	0.52296		350.823	1.70656	0.50927		350.823	1.77805	0.46214		416.366	1.55605	0.117512		408.609	1.63588	0.231793		750.909	1.77274	0.00230832		718.497	3.23157	0.869141		409.299	1.71514	0.354534		675.615	2.15033	0.06482		596.328	2.13555	0.06635		348.094	1.56536	0.317147		350.98	1.74062	0.52767
351.632	1.66417	0.52084		351.632	1.71008	0.50598		351.632	1.78073	0.45944		417.117	1.55556	0.117983		409.309	1.63466	0.230618		749.646	1.77328	0.00235935		717.623	3.2255	0.891049		409.94	1.71793	0.352417		674.216	2.15136	0.066		601.782	2.13258	0.06363		348.872	1.56386	0.314498		351.79	1.7435	0.52452
352.441	1.66767	0.5186		352.441	1.71347	0.50258		352.441	1.78333	0.45666		417.868	1.55508	0.118449		410.01	1.63341	0.229452		748.387	1.77383	0.00241062		716.751	3.21878	0.91274		410.581	1.72066	0.350205		672.822	2.15241	0.06718		607.337	2.12961	0.06097		349.649	1.56231	0.311891		352.6	1.74626	0.52128
353.25	1.67108	0.51625		353.25	1.71673	0.49907		353.25	1.78586	0.45379		418.619	1.5546	0.118908		410.711	1.63213	0.228295		747.132	1.77437	0.00246215		715.881	3.21141	0.934189		411.221	1.72334	0.347899		671.435	2.15349	0.06836		612.995	2.12666	0.05839		350.427	1.56073	0.309328		353.41	1.7489	0.51797
354.059	1.67439	0.5138		354.059	1.71984	0.49546		354.059	1.78831	0.45085		419.369	1.55414	0.11936		411.411	1.63081	0.227148		745.882	1.77493	0.00251391		715.013	3.20341	0.955368		411.862	1.72595	0.3455		670.053	2.15459	0.06955		618.76	2.1237	0.05587		351.204	1.5591	0.306808		354.22	1.75141	0.51458
354.868	1.67761	0.51123		354.868	1.72282	0.49176		354.868	1.79068	0.44782		420.12	1.55369	0.119806		412.112	1.62945	0.22601		744.635	1.77548	0.00256591		714.147	3.19479	0.976253		412.503	1.7285	0.34301		668.677	2.15572	0.07075		624.634	2.12076	0.05342		351.982	1.55744	0.304332		355.03	1.75379	0.51112
355.677	1.68074	0.50857		355.677	1.72564	0.48797		355.677	1.79297	0.44472		420.871	1.55324	0.120243		412.813	1.62806	0.224884		743.393	1.77604	0.00261813		713.284	3.18558	0.996819		413.143	1.73098	0.34043		667.306	2.15687	0.07196		630.621	2.11783	0.05103		352.759	1.55575	0.301899		355.84	1.75605	0.50759
356.486	1.68375	0.5058		356.486	1.72832	0.4841		356.486	1.79517	0.44155		421.622	1.5528	0.120672		413.514	1.62664	0.223768		742.155	1.7766	0.00267057		712.422	3.17579	1.01704		413.784	1.73338	0.337762		665.941	2.15803	0.07318		636.724	2.11492	0.0487		353.537	1.55401	0.299509		356.65	1.75817	0.50401
357.295	1.68666	0.50294		357.295	1.73084	0.48015		357.295	1.79728	0.43831		422.372	1.55238	0.121091		414.214	1.62518	0.222664		740.921	1.77717	0.00272321		711.563	3.16544	1.03691		414.424	1.73572	0.335009		664.582	2.15922	0.07442		642.946	2.11201	0.04644		354.314	1.55225	0.297163		357.46	1.76016	0.50037
358.104	1.68946	0.49999		358.104	1.73321	0.47613		358.104	1.79929	0.435		423.123	1.55196	0.1215		414.915	1.62368	0.221573		739.691	1.77774	0.00277606		710.706	3.15454	1.05638		415.065	1.73797	0.332172		663.228	2.16042	0.07567		649.291	2.10913	0.04423		355.092	1.55045	0.294861		358.27	1.76202	0.49669
358.913	1.69215	0.49695		358.913	1.73543	0.47205		358.913	1.80121	0.43163		423.874	1.55155	0.121898		415.616	1.62215	0.220495		738.465	1.77831	0.00282911		709.85	3.14313	1.07546		415.706	1.74013	0.329254		661.879	2.16164	0.07694		655.762	2.10625	0.04208		355.869	1.54862	0.292601		359.08	1.76374	0.49296
359.722	1.69471	0.49383		359.722	1.73748	0.46792		359.722	1.80304	0.42819		424.625	1.55115	0.122284		416.316	1.62059	0.21943		737.243	1.77889	0.00288234		708.997	3.13121	1.09411		416.346	1.74221	0.326256		660.536	2.16287	0.07823		662.364	2.10339	0.03999		356.647	1.54675	0.290385		359.89	1.76532	0.48919
360.531	1.69716	0.49063		360.531	1.73938	0.46373		360.531	1.80476	0.4247		425.375	1.55076	0.122658		417.017	1.61899	0.218379		736.025	1.77947	0.00293574		708.146	3.11882	1.11233		416.987	1.7442	0.323183		659.199	2.16412	0.07955		669.1	2.10055	0.03796		357.425	1.54486	0.288213		360.7	1.76677	0.48539
361.34	1.69948	0.48735		361.34	1.74112	0.4595		361.34	1.80639	0.42115		426.126	1.55037	0.123018		417.718	1.61736	0.217344		734.812	1.78005	0.00298931		707.297	3.10596	1.13009		417.628	1.7461	0.320036		657.867	2.16538	0.08088		675.974	2.09773	0.03598		358.202	1.54293	0.286083		361.51	1.76809	0.48156
362.149	1.70168	0.484		362.149	1.7427	0.45523		362.149	1.80791	0.41755		426.877	1.55	0.123364		418.418	1.61569	0.216323		733.602	1.78064	0.00304303		706.45	3.09267	1.14737		418.268	1.74789	0.316819		656.54	2.16665	0.08223		682.991	2.09493	0.03405		358.98	1.54098	0.283996		362.32	1.76927	0.47771
362.958	1.70375	0.48059		362.958	1.74412	0.45094		362.958	1.80932	0.4139		427.628	1.54963	0.123694		419.119	1.61399	0.215319		732.396	1.78123	0.00309691		705.605	3.07897	1.16418		418.909	1.74959	0.313534		655.219	2.16793	0.08361		690.155	2.09214	0.03217		359.757	1.539	0.281952		363.13	1.77031	0.47384
363.767	1.70569	0.47712		363.767	1.74538	0.44662		363.767	1.81063	0.41021		428.378	1.54927	0.124008		419.82	1.61225	0.21433		731.194	1.78182	0.00315091		704.762	3.06489	1.18049		419.55	1.75119	0.310185		653.903	2.16922	0.08502		697.472	2.08937	0.03035		360.535	1.53699	0.27995		363.94	1.77122	0.46995
364.576	1.70749	0.47359		364.576	1.74648	0.44228		364.576	1.81183	0.40647		429.129	1.54891	0.124304		420.521	1.61048	0.213359		729.996	1.78242	0.00320505		703.921	3.05044	1.19629		420.19	1.75268	0.306776		652.592	2.17051	0.08644		704.944	2.08663	0.02857		361.312	1.53496	0.277991		364.75	1.77199	0.46605
365.385	1.70916	0.47		365.385	1.74742	0.43792		365.385	1.81292	0.40269		429.88	1.54856	0.124581		421.221	1.60868	0.212406		728.802	1.78302	0.00325929		703.082	3.03564	1.21158		420.831	1.75406	0.30331		651.287	2.17182	0.0879		712.579	2.0839	0.02684		362.09	1.5329	0.276074		365.56	1.77263	0.46215
366.194	1.71069	0.46638		366.194	1.7482	0.43357		366.194	1.8139	0.39888		430.631	1.54822	0.124839		421.922	1.60684	0.211471		727.612	1.78363	0.00331364		702.245	3.02054	1.22634		421.471	1.75534	0.29979		649.986	2.17313	0.08938		720.381	2.08119	0.02515		362.867	1.53081	0.274199		366.37	1.77314	0.45826
367.003	1.71209	0.4627		367.003	1.74883	0.42921		367.003	1.81476	0.39504		431.381	1.54789	0.125076		422.623	1.60497	0.210555		726.426	1.78424	0.00336809		701.41	3.00514	1.24057		422.112	1.7565	0.296221		648.691	2.17444	0.09088		728.356	2.07851	0.02351		363.645	1.5287	0.272366		367.18	1.77352	0.45436
367.812	1.71334	0.459		367.812	1.7493	0.42485		367.812	1.81551	0.39117		432.132	1.54755	0.125292		423.323	1.60306	0.209658		725.244	1.78485	0.00342261		700.577	2.98947	1.25425		422.753	1.75754	0.292606		647.401	2.17576	0.09242		736.509	2.07584	0.02191		364.422	1.52657	0.270573		367.99	1.77376	0.45047
368.621	1.71446	0.45526		368.621	1.74962	0.42051		368.621	1.81615	0.38728		432.883	1.54722	0.125484		424.024	1.60112	0.208782		724.065	1.78547	0.00347719		699.746	2.97356	1.2674		423.393	1.75847	0.28895		646.116	2.17708	0.09398		744.847	2.0732	0.02036		365.2	1.52442	0.268822		368.8	1.77388	0.4466
369.43	1.71544	0.45149		369.43	1.74979	0.41618		369.43	1.81667	0.38337		433.634	1.54689	0.125653		424.725	1.59915	0.207926		722.891	1.78609	0.00353183		698.917	2.95743	1.27999		424.034	1.75928	0.285256		644.837	2.1784	0.09557		753.376	2.07058	0.01885		365.977	1.52224	0.267111		369.61	1.77387	0.44274
370.239	1.71627	0.4477		370.239	1.7498	0.41187		370.239	1.81707	0.37944		434.384	1.54656	0.125797		425.425	1.59714	0.207091		721.72	1.78672	0.00358652		698.09	2.94111	1.29204		424.675	1.75997	0.281529		643.562	2.17972	0.09719		762.102	2.06798	0.01737		366.755	1.52004	0.265441		370.42	1.77374	0.4389
371.048	1.71696	0.4439		371.048	1.74968	0.40759		371.048	1.81736	0.3755		435.135	1.54623	0.125915		426.126	1.5951	0.206278		720.553	1.78735	0.00364123		697.264	2.92462	1.30353		425.315	1.76053	0.277772		642.292	2.18105	0.09884		771.033	2.0654	0.01594		367.532	1.51783	0.26381		371.23	1.77348	0.43509
371.857	1.71752	0.44008		371.857	1.7494	0.40333		371.857	1.81753	0.37155		435.886	1.5459	0.126006		426.827	1.59303	0.205488		719.39	1.78798	0.00369595		696.441	2.90798	1.31447		425.956	1.76098	0.273991		641.028	2.18237	0.10052		780.176	2.06285	0.01454		368.31	1.51559	0.262219		372.04	1.77311	0.4313
372.666	1.71793	0.43626		372.666	1.74899	0.39912		372.666	1.81759	0.36759		436.637	1.54557	0.12607		427.528	1.59092	0.204721		718.23	1.78862	0.00375067		695.62	2.89122	1.32485		426.597	1.7613	0.27019		639.768	2.18369	0.10223		789.538	2.06031	0.01318		369.087	1.51333	0.260667		372.85	1.77261	0.42754
373.475	1.71819	0.43244		373.475	1.74843	0.39494		373.475	1.81752	0.36363		437.387	1.54522	0.126106		428.228	1.58878	0.203978		717.074	1.78926	0.00380537		694.801	2.87436	1.33469		427.237	1.76149	0.266373		638.513	2.18501	0.10397		799.127	2.0578	0.01186		369.865	1.51106	0.259154		373.66	1.77199	0.42382
374.284	1.71832	0.42862		374.284	1.74774	0.3908		374.284	1.81734	0.35968		438.138	1.54487	0.126113		428.929	1.58661	0.203259		715.922	1.78991	0.00386005		693.983	2.85743	1.34397		427.878	1.76156	0.262544		637.263	2.18632	0.10575		808.953	2.05531	0.01057		370.642	1.50876	0.257679		374.47	1.77126	0.42013
375.093	1.71831	0.4248		375.093	1.74691	0.38671		375.093	1.81704	0.35573		438.889	1.54452	0.12609		429.63	1.5844	0.202566		714.774	1.79056	0.00391468		693.168	2.84044	1.35271		428.519	1.76151	0.258708		636.018	2.18763	0.10755		819.023	2.05285	0.00932		371.42	1.50645	0.256241		375.28	1.77042	0.41649
375.902	1.71816	0.421		375.902	1.74596	0.38267		375.902	1.81663	0.35178		439.64	1.54415	0.126038		430.33	1.58216	0.201898		713.629	1.79122	0.00396924		692.354	2.82342	1.36092		429.159	1.76133	0.25487		634.778	2.18893	0.10939		829.346	2.0504	0.0081		372.197	1.50413	0.254841		376.09	1.76947	0.41289
376.711	1.71787	0.41722		376.711	1.74487	0.37868		376.711	1.8161	0.34786		440.39	1.54376	0.125956		431.031	1.57989	0.201256		712.488	1.79188	0.00402373		691.542	2.80639	1.36858		429.8	1.76102	0.251033		633.543	2.19023	0.11125		839.934	2.04798	0.00691		372.975	1.50178	0.253478		376.9	1.76841	0.40933
377.52	1.71744	0.41345		377.52	1.74367	0.37475		377.52	1.81545	0.34395		441.141	1.54336	0.125844		431.732	1.57759	0.200641		711.351	1.79255	0.00407813		690.733	2.78937	1.37572		430.44	1.76059	0.247203		632.312	2.19152	0.11316		850.795	2.04558	0.00575		373.752	1.49942	0.25215		377.71	1.76724	0.40582
378.329	1.71688	0.40972		378.329	1.74234	0.37088		378.329	1.81469	0.34006		441.892	1.54294	0.125702		432.432	1.57525	0.200054		710.217	1.79322	0.00413241		689.925	2.77238	1.38234		431.081	1.76003	0.243383		631.087	2.1928	0.11509		861.941	2.0432	0.00462		374.53	1.49705	0.250858		378.52	1.76597	0.40236
379.138	1.71619	0.40601		379.138	1.74089	0.36708		379.138	1.81382	0.33619		442.643	1.5425	0.12553		433.133	1.57288	0.199495		709.087	1.7939	0.00418656		689.119	2.75545	1.38844		431.722	1.75934	0.239579		629.866	2.19407	0.11706		873.383	2.04084	0.00353		375.307	1.49465	0.249602		379.33	1.7646	0.39896
379.947	1.71536	0.40234		379.947	1.73933	0.36334		379.947	1.81283	0.33235		443.393	1.54204	0.125329		433.834	1.57048	0.198966		707.96	1.79458	0.00424056		688.315	2.73858	1.39404		432.362	1.75854	0.235793		628.649	2.19533	0.11906		885.132	2.03851	0.00246		376.085	1.49225	0.248379		380.14	1.76313	0.3956
380.756	1.7144	0.3987		380.756	1.73765	0.35966		380.756	1.81173	0.32854		444.144	1.54155	0.125101		434.535	1.56805	0.198466		706.837	1.79527	0.0042944		687.512	2.72181	1.39915		433.003	1.7576	0.232032		627.438	2.19658	0.1211		897.202	2.0362	0.00142		376.862	1.48983	0.247191		380.95	1.76157	0.39231
381.565	1.71332	0.39511		381.565	1.73587	0.35606		381.565	1.81053	0.32477		444.895	1.54104	0.124845		435.235	1.56559	0.197996		705.717	1.79596	0.00434806		686.712	2.70514	1.40376		433.644	1.75655	0.228298		626.231	2.19782	0.12317		909.606	2.03391	0.000402443		377.64	1.48739	0.246036		381.76	1.75991	0.38908
382.374	1.7121	0.39157		382.374	1.73398	0.35253		382.374	1.80921	0.32103		445.646	1.54049	0.124562		435.936	1.56309	0.197557		704.602	1.79665	0.00440151		685.914	2.6886	1.40791		434.284	1.75538	0.224597		625.029	2.19904	0.12528		922.357	2.03164	-0.000584956		378.418	1.48494	0.244913		382.57	1.75816	0.3859
383.183	1.71077	0.38808		383.183	1.732	0.34908		383.183	1.80779	0.31733		446.396	1.53991	0.124256		436.637	1.56057	0.19715		703.489	1.79736	0.00445474		685.117	2.67221	1.41159		434.925	1.75408	0.220931		623.831	2.20024	0.12742		935.471	2.02939	-0.00155		379.195	1.48248	0.243822		383.38	1.75632	0.38279
383.992	1.70931	0.38464		383.992	1.72991	0.3457		383.992	1.80625	0.31368		447.147	1.5393	0.123926		437.337	1.55801	0.196775		702.38	1.79807	0.00450773		684.322	2.65597	1.41482		435.566	1.75267	0.217305		622.638	2.20143	0.12959		948.964	2.02716	-0.00248		379.973	1.48	0.242763		384.19	1.7544	0.37974
384.801	1.70773	0.38126		384.801	1.72773	0.3424		384.801	1.80462	0.31007		447.898	1.53865	0.123576		438.038	1.55542	0.196433		701.275	1.79878	0.00456046		683.529	2.63991	1.41761		436.206	1.75114	0.213723		621.449	2.2026	0.1318		962.851	2.02496	-0.0034		380.75	1.47751	0.241734		385	1.75239	0.37676
385.61	1.70604	0.37794		385.61	1.72545	0.33918		385.61	1.80288	0.30652		448.649	1.53796	0.123207		438.739	1.55281	0.196125		700.173	1.7995	0.0046129		682.738	2.62403	1.41998		436.847	1.7495	0.210188		620.265	2.20375	0.13405		977.151	2.02278	-0.00428		381.528	1.47501	0.240735		385.81	1.75031	0.37384
386.419	1.70423	0.37468		386.419	1.72309	0.33604		386.419	1.80105	0.30301		449.399	1.53723	0.122821		439.439	1.55016	0.195851		699.074	1.80022	0.00466504		681.949	2.60836	1.42194		437.487	1.74775	0.206704		619.086	2.20489	0.13633		991.882	2.02061	-0.00515		382.305	1.47249	0.239765		386.62	1.74814	0.37099
387.228	1.70231	0.37149		387.228	1.72064	0.33298		387.228	1.79911	0.29956		450.15	1.53646	0.122421		440.14	1.54748	0.195612		697.979	1.80096	0.00471686		681.161	2.59292	1.42349		438.128	1.74589	0.203275		617.911	2.206	0.13865						383.083	1.46996	0.238824		387.43	1.7459	0.36821
388.037	1.70028	0.36837		388.037	1.71811	0.33001		388.037	1.79708	0.29617		450.901	1.53564	0.12201		440.841	1.54478	0.19541		696.888	1.80169	0.00476834		680.376	2.5777	1.42466		438.769	1.74392	0.199904		616.74	2.20708	0.141						383.86	1.46741	0.23791		388.24	1.74358	0.3655
388.846	1.69815	0.36533		388.846	1.7155	0.32712		388.846	1.79495	0.29283		451.652	1.53478	0.12159		441.542	1.54204	0.195243		695.8	1.80244	0.00481944		679.592	2.56272	1.42547		439.409	1.74184	0.196593		615.574	2.20815	0.14339						384.638	1.46485	0.237024		389.05	1.7412	0.36286
389.655	1.69591	0.36236		389.655	1.71281	0.32432		389.655	1.79273	0.28956		452.402	1.53388	0.121165		442.242	1.53928	0.195114		694.715	1.80319	0.00487016		678.81	2.548	1.42591		440.05	1.73966	0.193347		614.412	2.20918	0.14581						385.415	1.46227	0.236163		389.86	1.73874	0.3603
390.464	1.69357	0.35947		390.464	1.71005	0.3216		390.464	1.79042	0.28636		453.153	1.53293	0.120736		442.943	1.53648	0.195023		693.633	1.80394	0.00492047		678.03	2.53355	1.42602		440.691	1.73738	0.190168		613.255	2.21019	0.14827						386.193	1.45968	0.235328		390.67	1.73622	0.35781
391.273	1.69113	0.35666		391.273	1.70722	0.31898		391.273	1.78803	0.28322		453.904	1.53193	0.120308		443.644	1.53366	0.19497		692.555	1.8047	0.00497035		677.251	2.51937	1.42581		441.331	1.735	0.187059		612.102	2.21117	0.15076						386.97	1.45707	0.234518		391.48	1.73363	0.35539
392.082	1.68861	0.35393		392.082	1.70432	0.31644		392.082	1.78554	0.28015		454.655	1.53089	0.119882		444.344	1.53082	0.194957		691.481	1.80547	0.00501977		676.474	2.50548	1.42529		441.972	1.73253	0.184023		610.953	2.21212	0.15329						387.748	1.45445	0.233731		392.29	1.73098	0.35304
392.891	1.68599	0.35129		392.891	1.70136	0.31398		392.891	1.78298	0.27716		455.405	1.5298	0.119463		445.045	1.52794	0.194984		690.409	1.80625	0.00506872		675.7	2.49188	1.42448		442.613	1.72997	0.181061		609.809	2.21304	0.15586						388.525	1.45181	0.232968		393.1	1.72827	0.35077
393.7	1.68328	0.34874		393.7	1.69833	0.31162		393.7	1.78033	0.27424		456.156	1.52867	0.119053		445.746	1.52504	0.195052		689.341	1.80703	0.00511717		674.926	2.47859	1.42339		443.253	1.72732	0.178178		608.669	2.21393	0.15846						389.303	1.44915	0.232227		393.91	1.72551	0.34858
394.509	1.68048	0.34628		394.509	1.69524	0.30935		394.509	1.77761	0.27139		456.907	1.52749	0.118654		446.446	1.52211	0.195161		688.276	1.80782	0.00516509		674.155	2.46561	1.42205		443.894	1.72458	0.175374		607.533	2.21478	0.16109						390.08	1.44648	0.231508		394.72	1.72268	0.34646
395.318	1.67761	0.34391		395.318	1.6921	0.30716		395.318	1.77481	0.26862		457.658	1.52626	0.118269		447.147	1.51916	0.195312		687.215	1.80862	0.00521248		673.386	2.45295	1.42047		444.535	1.72176	0.172652		606.401	2.21559	0.16376						390.858	1.44378	0.230809		395.53	1.71981	0.34442
396.127	1.67466	0.34163		396.127	1.6889	0.30507		396.127	1.77194	0.26593		458.408	1.525	0.117901		447.848	1.51618	0.195507		686.157	1.80942	0.00525929		672.618	2.44061	1.41867		445.175	1.71886	0.170014		605.274	2.21636	0.16646						391.635	1.44107	0.230131		396.34	1.71688	0.34246
396.936	1.67163	0.33944		396.936	1.68564	0.30306		396.936	1.76899	0.26332		459.159	1.5237	0.117552		448.549	1.51317	0.195745		685.102	1.81024	0.00530552		671.852	2.4286	1.41666		445.816	1.71588	0.167461		604.151	2.2171	0.16919						392.413	1.43833	0.229472		397.15	1.7139	0.34057
397.745	1.66852	0.33736		397.745	1.68234	0.30115		397.745	1.76598	0.26079		459.91	1.52235	0.117225		449.249	1.51014	0.196027		684.05	1.81106	0.00535113		671.087	2.41693	1.41447		446.456	1.71283	0.164996		603.032	2.21779	0.17195						393.19	1.43558	0.228832		397.96	1.71087	0.33876
398.554	1.66535	0.33537		398.554	1.67899	0.29933		398.554	1.7629	0.25834		460.661	1.52097	0.11692		449.95	1.50709	0.196354		683.002	1.81188	0.00539611		670.325	2.40559	1.41212		447.097	1.70971	0.16262		601.917	2.21844	0.17474						393.968	1.43279	0.22821		398.77	1.7078	0.33703
399.363	1.66212	0.33348		399.363	1.6756	0.2976		399.363	1.75976	0.25598		461.411	1.51956	0.11664		450.651	1.50401	0.196728		681.956	1.81272	0.00544044		669.564	2.39459	1.40961		447.738	1.70652	0.160334		600.806	2.21904	0.17757						394.745	1.42998	0.227606		399.58	1.70468	0.33538
400.172	1.65882	0.33169		400.172	1.67216	0.29596		400.172	1.75656	0.25371		462.162	1.51811	0.116386		451.351	1.50091	0.197147		680.914	1.81356	0.00548409		668.805	2.38394	1.40698		448.378	1.70327	0.15814		599.699	2.21959	0.18042						395.523	1.42715	0.227019		400.39	1.70153	0.33381
400.981	1.65546	0.33		400.981	1.66868	0.29441		400.981	1.75331	0.25152		462.913	1.51663	0.11616		452.052	1.49779	0.197614		679.875	1.81442	0.00552704		668.047	2.37363	1.40423		449.019	1.69995	0.156038		598.597	2.2201	0.1833						396.3	1.42428	0.226449		401.2	1.69833	0.33232
401.79	1.65204	0.32842		401.79	1.66516	0.29295		401.79	1.74999	0.24942		463.664	1.51512	0.115962		452.753	1.49465	0.198129		678.84	1.81528	0.00556928		667.292	2.36367	1.4014		449.66	1.69658	0.15403		597.498	2.22055	0.1862						397.078	1.42139	0.225896		402.01	1.69509	0.3309
402.599	1.64857	0.32694		402.599	1.66161	0.29158		402.599	1.74663	0.24741		464.414	1.51358	0.115794		453.453	1.49149	0.198693		677.807	1.81615	0.00561078		666.538	2.35404	1.39849		450.3	1.69315	0.152117		596.404	2.22095	0.18914						397.855	1.41845	0.225359		402.82	1.69182	0.32957
403.408	1.64505	0.32556		403.408	1.65802	0.2903		403.408	1.74321	0.2455		465.165	1.51202	0.115655		454.154	1.4883	0.199306		676.777	1.81703	0.00565153		665.785	2.34477	1.39553		450.941	1.68967	0.150299		595.313	2.2213	0.19209						398.633	1.41549	0.224838		403.63	1.68851	0.32831
404.217	1.64148	0.32429		404.217	1.6544	0.28911		404.217	1.73975	0.24367		465.916	1.51043	0.115547		454.855	1.4851	0.199969		675.751	1.81792	0.0056915		665.035	2.33583	1.39254		451.582	1.68614	0.148578		594.226	2.22159	0.19506						399.41	1.41248	0.224333		404.44	1.68517	0.32714
405.026	1.63787	0.32312		405.026	1.65075	0.28802		405.026	1.73625	0.24193		466.667	1.50883	0.115469		455.556	1.48187	0.200682		674.728	1.81881	0.00573069		664.286	2.32722	1.38953		452.222	1.68257	0.146953		593.144	2.22182	0.19806						400.188	1.40943	0.223846		405.25	1.6818	0.32605
405.835	1.63422	0.32207		405.835	1.64707	0.28701		405.835	1.7327	0.24028		467.417	1.50721	0.115422		456.256	1.47863	0.201448		673.708	1.81972	0.00576907		663.538	2.31895	1.38653		452.863	1.67895	0.145425		592.065	2.222	0.20107						400.966	1.40634	0.223375		406.06	1.6784	0.32503
406.644	1.63053	0.32111		406.644	1.64336	0.2861		406.644	1.72911	0.23873		468.168	1.50556	0.115405		456.957	1.47537	0.202265		672.691	1.82064	0.00580663		662.793	2.311	1.38356		453.504	1.67529	0.143994		590.99	2.22211	0.2041						401.743	1.4032	0.222923		406.87	1.67497	0.3241
407.453	1.6268	0.32027		407.453	1.63962	0.28527		407.453	1.72549	0.23727		468.919	1.50391	0.115418		457.658	1.47209	0.203135		671.677	1.82157	0.00584336		662.049	2.30337	1.38063		454.144	1.6716	0.142661		589.919	2.22215	0.20714						402.521	1.4	0.222491		407.68	1.67151	0.32324
408.262	1.62304	0.31953		408.262	1.63587	0.28454		408.262	1.72183	0.23591		469.67	1.50224	0.115461		458.358	1.4688	0.204059		670.666	1.8225	0.00587925		661.307	2.29604	1.37777		454.785	1.66787	0.141426		588.852	2.22214	0.2102						403.298	1.39675	0.222079		408.49	1.66803	0.32247
409.071	1.61925	0.3189		409.071	1.63209	0.28389		409.071	1.71815	0.23464		470.42	1.50056	0.115533		459.059	1.46549	0.205036		669.658	1.82345	0.00591429		660.566	2.28902	1.37498		455.425	1.66411	0.140289		587.789	2.22206	0.21326						404.076	1.39344	0.221691		409.3	1.66452	0.32177
409.88	1.61544	0.31838		409.88	1.62829	0.28334		409.88	1.71443	0.23346		471.171	1.49887	0.115634		459.76	1.46217	0.206069		668.653	1.82441	0.00594847		659.827	2.28228	1.3723		456.066	1.66032	0.13925		586.73	2.22191	0.21632						404.853	1.39007	0.221328		410.11	1.66099	0.32116
410.689	1.6116	0.31797		410.689	1.62448	0.28287		410.689	1.71068	0.23237		471.922	1.49717	0.115762		460.46	1.45884	0.207157		667.651	1.82538	0.00598179		659.09	2.27582	1.36973		456.707	1.6565	0.138308		585.674	2.22169	0.21939						405.631	1.38662	0.220993		410.92	1.65745	0.32063
411.498	1.60775	0.31767		411.498	1.62064	0.2825		411.498	1.70692	0.23139		472.673	1.49546	0.115917		461.161	1.45549	0.208301		666.652	1.82637	0.00601425		658.355	2.26962	1.3673		457.347	1.65266	0.137464		584.623	2.22141	0.22246						406.408	1.38311	0.22069		411.73	1.65388	0.32018
412.307	1.60387	0.31747		412.307	1.61679	0.28222		412.307	1.70313	0.23049		473.423	1.49374	0.116099		461.862	1.45213	0.209501		665.656	1.82736	0.00604584		657.621	2.26366	1.36501		457.988	1.6488	0.136717		583.575	2.22105	0.22553						407.186	1.37952	0.220423		412.54	1.6503	0.3198
413.116	1.59998	0.31739		413.116	1.61293	0.28202		413.116	1.69932	0.22969		474.174	1.49202	0.116306		462.563	1.44875	0.210759		664.664	1.82837	0.00607657		656.888	2.25794	1.36289		458.629	1.64493	0.136067		582.531	2.22063	0.22859						407.963	1.37584	0.220197		413.35	1.6467	0.31951
413.925	1.59608	0.31741		413.925	1.60906	0.28191		413.925	1.6955	0.22898		474.925	1.49029	0.116537		463.263	1.44537	0.212075		663.674	1.82939	0.00610645		656.158	2.25243	1.36095		459.269	1.64103	0.135514		581.49	2.22013	0.23164						408.741	1.37208	0.220018		414.16	1.64308	0.3193
414.734	1.59217	0.31754		414.734	1.60518	0.2819		414.734	1.69166	0.22837		475.676	1.48856	0.116791		463.964	1.44198	0.21345		662.687	1.83042	0.0061355		655.429	2.24712	1.35919		459.91	1.63713	0.135056		580.453	2.21957	0.23468						409.518	1.36823	0.219892		414.97	1.63946	0.31917
415.543	1.58826	0.31778		415.543	1.60129	0.28197		415.543	1.68781	0.22785		476.426	1.48683	0.117068		464.665	1.43858	0.214883		661.702	1.83146	0.00616371		654.701	2.24198	1.35764		460.551	1.63321	0.134694		579.42	2.21893	0.2377						410.296	1.36429	0.219828		415.78	1.63582	0.31912
416.352	1.58434	0.31813		416.352	1.59739	0.28213		416.352	1.68396	0.22743		477.177	1.48509	0.117366		465.365	1.43517	0.216376		660.721	1.83252	0.00619113		653.975	2.237	1.3563		461.191	1.62928	0.134427		578.391	2.21822	0.2407						411.073	1.36024	0.219834		416.59	1.63217	0.31915
417.161	1.58042	0.31859		417.161	1.59349	0.28238		417.161	1.68009	0.2271		477.928	1.48335	0.117684		466.066	1.43176	0.21793		659.743	1.8336	0.00621777		653.251	2.23216	1.35517		461.832	1.62535	0.134255		577.365	2.21744	0.24368						411.851	1.3561	0.219919		417.4	1.62852	0.31926
417.97	1.57651	0.31915		417.97	1.58958	0.28272		417.97	1.67622	0.22686		478.679	1.48161	0.118022		466.767	1.42834	0.219543		658.768	1.83468	0.00624366		652.528	2.22743	1.35427		462.472	1.62142	0.134176		576.343	2.2166	0.24663						412.628	1.35185	0.220094		418.21	1.62486	0.31945
418.779	1.5726	0.31982		418.779	1.58567	0.28315		418.779	1.67235	0.22672		479.429	1.47987	0.118378		467.467	1.42492	0.221218		657.795	1.83578	0.00626883		651.807	2.22279	1.35361		463.113	1.61748	0.13419		575.325	2.21568	0.24955						413.406	1.3475	0.220371		419.02	1.62119	0.31973
419.588	1.5687	0.3206		419.588	1.58176	0.28366		419.588	1.66848	0.22666		480.18	1.47812	0.118752		468.168	1.42149	0.222955		656.826	1.8369	0.00629334		651.088	2.21821	1.35317		463.754	1.61354	0.134296		574.31	2.2147	0.25244						414.183	1.34305	0.220763		419.83	1.61752	0.32008
420.397	1.56481	0.32148		420.397	1.57786	0.28427		420.397	1.66462	0.2267		480.931	1.47637	0.119143		468.869	1.41807	0.224754		655.859	1.83803	0.00631723		650.37	2.21369	1.35296		464.394	1.60961	0.134493		573.298	2.21365	0.25528						414.961	1.33849	0.221283		420.64	1.61384	0.32051
421.206	1.56094	0.32247		421.206	1.57395	0.28496		421.206	1.66075	0.22683		481.682	1.47462	0.119549		469.57	1.41464	0.226615		654.895	1.83918	0.00634056		649.654	2.20918	1.35299		465.035	1.60568	0.134781		572.291	2.21254	0.25809						415.738	1.33383	0.221946		421.45	1.61017	0.32102
422.015	1.55708	0.32356		422.015	1.57005	0.28574		422.015	1.6569	0.22705		482.432	1.47287	0.11997		470.27	1.41121	0.22854		653.934	1.84035	0.0063634		648.939	2.20468	1.35325		465.676	1.60176	0.135158		571.286	2.21136	0.26085						416.516	1.32908	0.222767		422.26	1.60649	0.32162
422.824	1.55324	0.32476		422.824	1.56616	0.28661		422.824	1.65305	0.22736		483.183	1.47112	0.120405		470.971	1.40778	0.230527		652.976	1.84153	0.00638581		648.226	2.20015	1.35373		466.316	1.59784	0.135625		570.286	2.21013	0.26356						417.293	1.32424	0.223761		423.07	1.60282	0.32229
423.633	1.54942	0.32606		423.633	1.56227	0.28757		423.633	1.64921	0.22776		483.934	1.46937	0.120854		471.672	1.40436	0.232579		652.02	1.84273	0.00640789		647.515	2.19558	1.35443		466.957	1.59394	0.136179		569.288	2.20884	0.26622						418.071	1.31933	0.224943		423.88	1.59915	0.32305
424.442	1.54563	0.32746		424.442	1.55839	0.28862		424.442	1.64539	0.22824		484.685	1.46761	0.121315		472.372	1.40094	0.234694		651.067	1.84395	0.00642973		646.805	2.19095	1.35534		467.598	1.59004	0.13682		568.295	2.2075	0.26882						418.848	1.31435	0.226328		424.69	1.59549	0.32388
425.251	1.54187	0.32896		425.251	1.55453	0.28975		425.251	1.64158	0.22882		485.435	1.46585	0.121788		473.073	1.39753	0.236874		650.118	1.84518	0.00645143		646.096	2.18623	1.35644		468.238	1.58616	0.137546		567.304	2.2061	0.27137						419.626	1.30932	0.22793		425.5	1.59183	0.32479
426.06	1.53814	0.33056		426.06	1.55068	0.29097		426.06	1.63779	0.22948		486.186	1.46408	0.122271		473.774	1.39412	0.239118		649.17	1.84644	0.00647312		645.389	2.18141	1.35773		468.879	1.5823	0.138358		566.317	2.20466	0.27385						420.403	1.30426	0.229761		426.31	1.58818	0.32579
426.869	1.53444	0.33227		426.869	1.54684	0.29228		426.869	1.63402	0.23022		486.937	1.46232	0.122766		474.474	1.39072	0.241428		648.226	1.84771	0.00649492		644.684	2.17647	1.35918		469.52	1.57845	0.139253		565.334	2.20318	0.27627						421.181	1.29919	0.231831		427.12	1.58454	0.32686
427.678	1.53078	0.33407		427.678	1.54301	0.29367		427.678	1.63027	0.23105		487.688	1.46055	0.12327		475.175	1.38733	0.243802		647.284	1.84901	0.00651699		643.98	2.17139	1.3608		470.16	1.57462	0.140231		564.354	2.20166	0.27863						421.959	1.29413	0.234148		427.93	1.58092	0.32802
428.487	1.52715	0.33597		428.487	1.53921	0.29516		428.487	1.62654	0.23197		488.438	1.45877	0.123783		475.876	1.38395	0.246242		646.346	1.85032	0.00653948		643.278	2.16617	1.36255		470.801	1.57082	0.141291		563.377	2.2001	0.28092						422.736	1.28911	0.236715		428.74	1.5773	0.32925
429.296	1.52357	0.33796		429.296	1.53543	0.29673		429.296	1.62284	0.23296		489.189	1.45699	0.124305		476.577	1.38058	0.248747		645.409	1.85166	0.00656257		642.577	2.16078	1.36443		471.441	1.56703	0.142432		562.404	2.19851	0.28314						423.514	1.28416	0.239535		429.55	1.5737	0.33056
430.105	1.52003	0.34005		430.105	1.53166	0.29838		430.105	1.61917	0.23404		489.94	1.45521	0.124835		477.277	1.37722	0.251318		644.476	1.85302	0.00658646		641.878	2.15522	1.3664		472.082	1.56326	0.143652		561.434	2.1969	0.28529						424.291	1.27929	0.242604		430.36	1.57012	0.33195
430.914	1.51654	0.34223		430.914	1.52792	0.30012		430.914	1.61552	0.2352		490.691	1.45342	0.125373		477.978	1.37388	0.253955		643.545	1.8544	0.00661136		641.18	2.14948	1.36847		472.723	1.55952	0.14495		560.468	2.19526	0.28737						425.069	1.27454	0.245914		431.17	1.56656	0.33342
431.723	1.5131	0.3445		431.723	1.52421	0.30195		431.723	1.61191	0.23644		491.441	1.45162	0.125917		478.679	1.37056	0.256657		642.617	1.8558	0.00663751		640.484	2.14355	1.37059		473.363	1.55581	0.146326		559.505	2.19361	0.28938						425.846	1.26992	0.249454		431.98	1.56301	0.33497
432.532	1.50971	0.34686		432.532	1.52052	0.30387		432.532	1.60832	0.23775		492.192	1.44982	0.126469		479.379	1.36725	0.259426		641.692	1.85723	0.00666517		639.789	2.13743	1.37276		474.004	1.55212	0.147778		558.545	2.19194	0.29132						426.624	1.26547	0.25321		432.79	1.55949	0.3366
433.341	1.50638	0.34931		433.341	1.51686	0.30587		433.341	1.60477	0.23914		492.943	1.44801	0.127027		480.08	1.36396	0.262259		640.769	1.85869	0.00669462		639.096	2.13111	1.37496		474.645	1.54846	0.149306		557.588	2.19027	0.29319						427.401	1.26121	0.257161		433.6	1.55599	0.3383
434.15	1.5031	0.35185		434.15	1.51324	0.30795		434.15	1.60126	0.24061		493.694	1.44619	0.127591		480.781	1.36069	0.265159		639.849	1.86017	0.00672616		638.404	2.1246	1.37717		475.285	1.54483	0.150907		556.635	2.18859	0.29499						428.179	1.25715	0.261287		434.41	1.55251	0.34009
434.959	1.49989	0.35447		434.959	1.50964	0.31012		434.959	1.59779	0.24215		494.444	1.44436	0.128161		481.481	1.35745	0.268124		638.931	1.86168	0.00676015		637.714	2.1179	1.37936		475.926	1.54124	0.152581		555.685	2.18691	0.29672						428.956	1.25331	0.265562		435.22	1.54906	0.34195
435.768	1.49673	0.35717		435.768	1.50609	0.31237		435.768	1.59435	0.24377		495.195	1.44252	0.128736		482.182	1.35422	0.271155		638.016	1.86321	0.00679693		637.026	2.111	1.38152		476.567	1.53767	0.154327		554.738	2.18524	0.29838						429.734	1.2497	0.269961		436.03	1.54564	0.34388
436.577	1.49364	0.35995		436.577	1.50257	0.31471		436.577	1.59095	0.24545		495.946	1.44067	0.129316		482.883	1.35102	0.27425		637.104	1.86477	0.00683691		636.338	2.10391	1.38363		477.207	1.53413	0.156144		553.794	2.18358	0.29998						430.511	1.24632	0.274456		436.84	1.54225	0.3459
437.386	1.49062	0.36281		437.386	1.49909	0.31713		437.386	1.5876	0.24721		496.697	1.43881	0.129902		483.584	1.34785	0.277411		636.195	1.86636	0.00688053		635.653	2.09664	1.38567		477.848	1.53063	0.15803		552.854	2.18193	0.30151						431.289	1.24318	0.279022		437.65	1.53889	0.34798
438.195	1.48767	0.36575		438.195	1.49565	0.31963		438.195	1.58429	0.24904		497.447	1.43694	0.130492		484.284	1.3447	0.280637		635.288	1.86799	0.00692824		634.968	2.0892	1.38764		478.488	1.52717	0.159984		551.916	2.1803	0.30299						432.066	1.24027	0.283632		438.46	1.53557	0.35015
439.004	1.48479	0.36876		439.004	1.49225	0.32221		439.004	1.58103	0.25093		498.198	1.43505	0.131086		484.985	1.34159	0.283927		634.383	1.86964	0.00698057		634.286	2.08159	1.38951		479.129	1.52374	0.162005		550.982	2.17869	0.3044						432.844	1.23759	0.288262		439.27	1.53228	0.35239
439.813	1.48198	0.37184		439.813	1.4889	0.32487		439.813	1.57781	0.25289		498.949	1.43315	0.131685		485.686	1.3385	0.287281		633.481	1.87132	0.00703805		633.604	2.07382	1.39127		479.77	1.52035	0.164093		550.052	2.17711	0.30576						433.621	1.23513	0.292889		440.08	1.52903	0.3547
440.622	1.47925	0.37499		440.622	1.4856	0.32761		440.622	1.57464	0.25491		499.7	1.43123	0.132289		486.386	1.33544	0.290698		632.582	1.87304	0.00710129		632.925	2.06591	1.39291		480.41	1.51699	0.166245		549.124	2.17555	0.30707						434.399	1.23287	0.297493		440.89	1.52582	0.35708
441.431	1.4766	0.3782		441.431	1.48235	0.33043		441.431	1.57152	0.25699		500.45	1.4293	0.132896		487.087	1.33242	0.294179		631.685	1.87479	0.00717092		632.246	2.05785	1.39442		481.051	1.51368	0.168461		548.199	2.17402	0.30832						435.176	1.23082	0.302057		441.7	1.52265	0.35954
442.24	1.47403	0.38148		442.24	1.47915	0.33333		442.24	1.56845	0.25914		501.201	1.42735	0.133508		487.788	1.32944	0.297722		630.791	1.87657	0.00724766		631.569	2.04967	1.39579		481.692	1.5104	0.170739		547.278	2.17253	0.30954						435.954	1.22894	0.306566		442.51	1.51952	0.36207
443.049	1.47154	0.38482		443.049	1.47601	0.33631		443.049	1.56543	0.26134		501.952	1.42539	0.134124		488.488	1.32648	0.301327		629.899	1.8784	0.00733223		630.894	2.04138	1.39701		482.332	1.50717	0.173079		546.359	2.17107	0.31071						436.731	1.22723	0.311009		443.32	1.51644	0.36467
443.858	1.46914	0.38822		443.858	1.47292	0.33936		443.858	1.56246	0.2636		502.703	1.4234	0.134744		489.189	1.32357	0.304994		629.01	1.88026	0.00742546		630.22	2.03299	1.39807		482.973	1.50397	0.175479		545.444	2.16964	0.31184						437.509	1.22566	0.315376		444.13	1.51341	0.36733
444.667	1.46682	0.39167		444.667	1.4699	0.34248		444.667	1.55955	0.26592		503.453	1.4214	0.135368		489.89	1.3207	0.308722		628.123	1.88215	0.00752822		629.547	2.0245	1.39897		483.614	1.50082	0.177938		544.531	2.16826	0.31294						438.286	1.22423	0.319661		444.94	1.51042	0.37007
445.476	1.46459	0.39517		445.476	1.46693	0.34568		445.476	1.5567	0.26829		504.204	1.41937	0.135996		490.591	1.31786	0.31251		627.239	1.88409	0.00764143		628.876	2.01594	1.39971		484.254	1.49771	0.180455		543.622	2.16691	0.31401						439.064	1.22291	0.323859		445.75	1.50749	0.37288
446.285	1.46245	0.39872		446.285	1.46403	0.34895		446.285	1.5539	0.27071		504.955	1.41732	0.136629		491.291	1.31507	0.316357		626.358	1.88606	0.00776613		628.206	2.00731	1.40027		484.895	1.49465	0.183028		542.716	2.1656	0.31506						439.841	1.2217	0.327969		446.56	1.50461	0.37575
447.094	1.46041	0.40231		447.094	1.46119	0.35229		447.094	1.55116	0.27319		505.706	1.41525	0.137267		491.992	1.31232	0.320263		625.478	1.88808	0.00790337		627.538	1.99863	1.40067		485.536	1.49163	0.185657		541.813	2.16433	0.31608						440.619	1.22057	0.331989		447.37	1.50179	0.37868
447.903	1.45845	0.40595		447.903	1.45843	0.35569		447.903	1.54847	0.27571		506.456	1.41315	0.13791		492.693	1.30962	0.324226		624.602	1.89014	0.00805435		626.871	1.9899	1.40089		486.176	1.48865	0.188341		540.913	2.1631	0.31708						441.396	1.21952	0.335921		448.18	1.49902	0.38168
448.712	1.45659	0.40962		448.712	1.45573	0.35916		448.712	1.54585	0.27828		507.207	1.41103	0.138557		493.393	1.30696	0.328246		623.727	1.89225	0.00822029		626.206	1.98114	1.40093		486.817	1.48572	0.191078		540.015	2.16191	0.31807						442.174	1.21853	0.339766		448.99	1.49631	0.38474
449.521	1.45482	0.41332		449.521	1.45311	0.3627		449.521	1.54328	0.28089		507.958	1.40888	0.13921		494.094	1.30435	0.332322		622.856	1.8944	0.00840255		625.542	1.97236	1.4008		487.457	1.48283	0.193867		539.121	2.16075	0.31905						442.952	1.2176	0.343529		449.8	1.49366	0.38786
450.33	1.45315	0.41706		450.33	1.45056	0.3663		450.33	1.54078	0.28355		508.709	1.4067	0.139869		494.795	1.30179	0.336453		621.986	1.8966	0.00860256		624.879	1.96357	1.4005		488.098	1.48	0.196707		538.23	2.15964	0.32002						443.729	1.2167	0.347212		450.61	1.49108	0.39104
451.139	1.45158	0.42082		451.139	1.44809	0.36995		451.139	1.53834	0.28625		509.459	1.40449	0.140534		495.495	1.29928	0.340638		621.119	1.89884	0.00882185		624.218	1.95478	1.40003		488.739	1.4772	0.199597		537.341	2.15856	0.32099						444.507	1.21584	0.350821		451.42	1.48856	0.39427
451.948	1.45011	0.42461		451.948	1.4457	0.37367		451.948	1.53596	0.28899		510.21	1.40224	0.141206		496.196	1.29682	0.344875		620.255	1.90113	0.00906208		623.558	1.946	1.39939		489.379	1.47446	0.202535		536.456	2.15752	0.32196						445.284	1.21501	0.354359		452.23	1.4861	0.39756
452.757	1.44873	0.42841		452.757	1.44339	0.37744		452.757	1.53364	0.29176		510.961	1.39997	0.141885		496.897	1.29441	0.349164		619.392	1.90348	0.00932499		622.899	1.93723	1.39859		490.02	1.47177	0.205521		535.573	2.15651	0.32293						446.062	1.2142	0.357833		453.04	1.48372	0.40091
453.566	1.44745	0.43223		453.566	1.44117	0.38126		453.566	1.53139	0.29457		511.712	1.39766	0.142571		497.598	1.29205	0.353504		618.533	1.90587	0.00961246		622.242	1.92849	1.39762		490.661	1.46912	0.208554		534.694	2.15554	0.32391						446.839	1.2134	0.361247		453.85	1.4814	0.4043
454.375	1.44628	0.43607		454.375	1.43903	0.38513		454.375	1.5292	0.29741		512.462	1.39531	0.143266		498.298	1.28975	0.357892		617.675	1.90832	0.0099265		621.587	1.91978	1.3965		491.301	1.46653	0.211632		533.817	2.15459	0.3249						447.617	1.21261	0.364606		454.66	1.47916	0.40775
455.184	1.4452	0.4399		455.184	1.43697	0.38905		455.184	1.52707	0.30029		513.213	1.39293	0.143971		498.999	1.28751	0.362329		616.82	1.91082	0.0102692		620.932	1.91112	1.39522		491.942	1.46398	0.214754		532.943	2.15367	0.32589						448.394	1.21183	0.367916		455.47	1.47698	0.41124
455.993	1.44422	0.44374		455.993	1.43501	0.39302		455.993	1.52501	0.30319		513.964	1.3905	0.144686		499.7	1.28532	0.366813		615.968	1.91338	0.0106429		620.279	1.90249	1.3938		492.583	1.46148	0.217919		532.072	2.15278	0.3269						449.172	1.21105	0.371181		456.28	1.47489	0.41477
456.802	1.44334	0.44758		456.802	1.43314	0.39702		456.802	1.52301	0.30612		514.715	1.38803	0.145411		500.4	1.28319	0.371341		615.117	1.916	0.01105		619.628	1.89392	1.39223		493.223	1.45904	0.221126		531.204	2.15191	0.32793						449.949	1.21027	0.374406		457.09	1.47287	0.41835
457.611	1.44255	0.45142		457.611	1.43135	0.40107		457.611	1.52108	0.30908		515.465	1.38552	0.146149		501.101	1.28112	0.375914		614.269	1.91867	0.011493		618.978	1.88541	1.39052		493.864	1.45664	0.224373		530.339	2.15106	0.32897						450.727	1.20949	0.377596		457.9	1.47092	0.42197
458.42	1.44187	0.45524		458.42	1.42967	0.40515		458.42	1.51921	0.31206		516.216	1.38296	0.146901		501.802	1.27911	0.38053		613.424	1.9214	0.0119747		618.329	1.87696	1.38868		494.505	1.4543	0.227661		529.476	2.15023	0.33003						451.504	1.20871	0.380755		458.71	1.46906	0.42563
459.229	1.44128	0.45905		459.229	1.42807	0.40926		459.229	1.51741	0.31506		516.967	1.38036	0.147667		502.503	1.27716	0.385186		612.58	1.92419	0.0124979		617.681	1.86858	1.3867		495.145	1.45201	0.230987		528.617	2.14941	0.33111						452.282	1.20792	0.383887		459.52	1.46728	0.42932
460.038	1.44079	0.46285		460.038	1.42657	0.4134		460.038	1.51568	0.31808		517.718	1.3777	0.148449		503.203	1.27527	0.389883		611.739	1.92704	0.0130657		617.035	1.86026	1.38461		495.786	1.44977	0.23435		527.76	2.14861	0.33221						453.059	1.20713	0.386997		460.33	1.46558	0.43304
460.847	1.44039	0.46662		460.847	1.42517	0.41756		460.847	1.51401	0.32111		518.468	1.37499	0.14925		503.904	1.27344	0.394617		610.901	1.92995	0.0136813		616.391	1.85202	1.38239		496.426	1.44758	0.23775		526.905	2.14782	0.33333						453.837	1.20633	0.390088		461.14	1.46396	0.43679
461.656	1.44009	0.47037		461.656	1.42387	0.42175		461.656	1.5124	0.32416		519.219	1.37223	0.150069		504.605	1.27167	0.399389		610.064	1.93293	0.0143481		615.747	1.84386	1.38006		497.067	1.44544	0.241185		526.054	2.14704	0.33448						454.614	1.20552	0.393163		461.95	1.46242	0.44057
462.465	1.43987	0.47408		462.465	1.42267	0.42595		462.465	1.51086	0.32723		519.97	1.36941	0.150911		505.305	1.26997	0.404195		609.23	1.93597	0.0150697		615.105	1.83578	1.37762		497.708	1.44336	0.244655		525.205	2.14626	0.33565						455.392	1.20471	0.396225		462.76	1.46097	0.44437
463.274	1.43975	0.47776		463.274	1.42156	0.43017		463.274	1.50939	0.3303		520.721	1.36652	0.151776		506.006	1.26834	0.409035		608.398	1.93907	0.0158499		614.464	1.82778	1.37508		498.348	1.44133	0.248157		524.36	2.14548	0.33684						456.169	1.20389	0.399279		463.57	1.45961	0.44819
464.083	1.43972	0.48141		464.083	1.42056	0.4344		464.083	1.50798	0.33339		521.471	1.36358	0.152668		506.707	1.26676	0.413907		607.569	1.94224	0.0166925		613.825	1.81986	1.37244		498.989	1.43936	0.251691		523.516	2.14471	0.33806						456.947	1.20307	0.402325		464.38	1.45833	0.45203
464.892	1.43977	0.48501		464.892	1.41965	0.43864		464.892	1.50663	0.33648		522.222	1.36057	0.153588		507.407	1.26526	0.41881		606.742	1.94547	0.0176019		613.187	1.81203	1.3697		499.63	1.43743	0.255256		522.676	2.14393	0.3393						457.724	1.20224	0.405368		465.19	1.45714	0.45588
465.701	1.43991	0.48857		465.701	1.41885	0.44287		465.701	1.50535	0.33958		522.973	1.35749	0.154541		508.108	1.26381	0.423742		605.917	1.94876	0.0185822		612.55	1.80428	1.36688		500.27	1.43556	0.258851		521.838	2.14315	0.34056						458.502	1.2014	0.408409		466	1.45603	0.45975
466.51	1.44012	0.49208		466.51	1.41815	0.44711		466.51	1.50413	0.34268		523.724	1.35435	0.155528		508.809	1.26244	0.428701		605.094	1.95212	0.019638		611.915	1.79662	1.36397		500.911	1.43374	0.262475		521.003	2.14235	0.34185						459.279	1.20056	0.41145		466.81	1.45501	0.46362
467.319	1.44042	0.49554		467.319	1.41754	0.45134		467.319	1.50298	0.34578		524.474	1.35112	0.156554		509.51	1.26113	0.433685		604.273	1.95555	0.0207741		611.281	1.78905	1.36098		501.552	1.43198	0.266127		520.17	2.14155	0.34316						460.057	1.19972	0.414494		467.62	1.45408	0.4675
468.128	1.44079	0.49894		468.128	1.41704	0.45556		468.128	1.50189	0.34888		525.225	1.34783	0.157622		510.21	1.25989	0.438694		603.455	1.95903	0.0219953		610.648	1.78157	1.35791		502.192	1.43027	0.269805		519.341	2.14074	0.34449						460.834	1.19887	0.417542		468.43	1.45324	0.47137
468.937	1.44123	0.50228		468.937	1.41663	0.45977		468.937	1.50086	0.35198		525.976	1.34445	0.158737		510.911	1.25871	0.443725		602.639	1.96258	0.0233067		610.016	1.77418	1.35477		502.833	1.42862	0.273509		518.514	2.13991	0.34585						461.612	1.19802	0.420596		469.24	1.45248	0.47525
469.746	1.44174	0.50556		469.746	1.41632	0.46396		469.746	1.49989	0.35507		526.727	1.341	0.159904		511.612	1.2576	0.448777		601.825	1.96619	0.0247134		609.386	1.76688	1.35156		503.473	1.42702	0.277237		517.689	2.13906	0.34722						462.389	1.19717	0.423658		470.05	1.45181	0.47912
470.555	1.44232	0.50877		470.555	1.41611	0.46813		470.555	1.49898	0.35816		527.477	1.33745	0.161127		512.312	1.25656	0.453848		601.013	1.96986	0.026221		608.757	1.75966	1.34829		504.114	1.42547	0.280989		516.867	2.13819	0.34861						463.167	1.19632	0.426728		470.86	1.45123	0.48298
471.364	1.44296	0.51191		471.364	1.41599	0.47228		471.364	1.49813	0.36124		528.228	1.33383	0.162412		513.013	1.25558	0.458936		600.203	1.97359	0.027835		608.13	1.75254	1.34496		504.755	1.42397	0.284763		516.048	2.13731	0.35003						463.944	1.19547	0.429809		471.67	1.45073	0.48683
472.173	1.44366	0.51499		472.173	1.41597	0.4764		472.173	1.49734	0.36432		528.979	1.33011	0.163766		513.714	1.25468	0.464041		599.396	1.97738	0.0295609		607.503	1.7455	1.34158		505.395	1.42253	0.288559		515.231	2.1364	0.35145						464.722	1.19462	0.432902		472.48	1.45032	0.49066
472.982	1.44441	0.51799		472.982	1.41604	0.48048		472.982	1.4966	0.36738		529.73	1.3263	0.165194		514.414	1.25384	0.46916		598.591	1.98122	0.0314045		606.878	1.73855	1.33813		506.036	1.42115	0.292375		514.417	2.13546	0.3529						465.5	1.19377	0.436007		473.29	1.44999	0.49448
473.791	1.44521	0.52091		473.791	1.4162	0.48453		473.791	1.49592	0.37042		530.48	1.3224	0.166705		515.115	1.25306	0.474292		597.788	1.98511	0.0333717		606.255	1.73169	1.33464		506.677	1.41981	0.296211		513.606	2.1345	0.35436						466.277	1.19292	0.439125		474.1	1.44975	0.49827
474.6	1.44606	0.52375		474.6	1.41645	0.48854		474.6	1.4953	0.37346		531.231	1.3184	0.168305		515.816	1.25235	0.479435		596.987	1.98904	0.0354684		605.632	1.72491	1.3311		507.317	1.41854	0.300065		512.797	2.13351	0.35583						467.055	1.19207	0.442258		474.91	1.44958	0.50204
475.409	1.44695	0.52652		475.409	1.41679	0.4925		475.409	1.49474	0.37647		531.982	1.3143	0.170004		516.517	1.25171	0.484587		596.188	1.99302	0.0377004		605.011	1.71822	1.32752		507.958	1.41731	0.303937		511.99	2.13249	0.35731						467.832	1.19123	0.445406		475.72	1.4495	0.50578
476.218	1.44788	0.5292		476.218	1.41721	0.49642		476.218	1.49422	0.37947		532.733	1.3101	0.171811		517.217	1.25114	0.489748		595.392	1.99704	0.0400735		604.391	1.71161	1.3239		508.599	1.41614	0.307826		511.186	2.13144	0.3588						468.61	1.1904	0.44857		476.53	1.4495	0.50948
477.027	1.44884	0.5318		477.027	1.41771	0.50028		477.027	1.49376	0.38245		533.483	1.30581	0.173736		517.918	1.25063	0.494916		594.597	2.00109	0.0425937		603.772	1.70509	1.32024		509.239	1.41502	0.31173		510.385	2.13036	0.3603						469.387	1.18957	0.451751		477.34	1.44957	0.51316
477.836	1.44983	0.53431		477.836	1.41829	0.5041		477.836	1.49335	0.38541		534.234	1.30141	0.175789		518.619	1.25018	0.500088		593.805	2.00516	0.0452665		603.155	1.69864	1.31654		509.88	1.41395	0.315648		509.586	2.12924	0.3618						470.165	1.18875	0.454949		478.15	1.44972	0.51679
478.645	1.45084	0.53673		478.645	1.41895	0.50785		478.645	1.49299	0.38835		534.985	1.29692	0.177982		519.319	1.2498	0.505265		593.015	2.00926	0.0480977		602.539	1.69228	1.3128		510.521	1.41294	0.319581		508.79	2.12809	0.36331						470.942	1.18794	0.458165		478.96	1.44994	0.52038
479.454	1.45187	0.53907		479.454	1.41968	0.51155		479.454	1.49267	0.39126		535.736	1.29233	0.180327		520.02	1.24949	0.510443		592.226	2.01338	0.0510924		601.924	1.686	1.30904		511.161	1.41198	0.323526		507.996	2.1269	0.36482						471.72	1.18713	0.461399		479.77	1.45024	0.52393
480.263	1.45292	0.54132		480.263	1.42048	0.51518		480.263	1.4924	0.39415		536.486	1.28764	0.182838		520.721	1.24924	0.515623		591.44	2.0175	0.0542557		601.311	1.6798	1.30525		511.802	1.41107	0.327483		507.204	2.12568	0.36633						472.497	1.18633	0.464651		480.58	1.4506	0.52743
481.072	1.45398	0.54349		481.072	1.42135	0.51875		481.072	1.49218	0.39702		537.237	1.28286	0.185527		521.421	1.24905	0.520802		590.656	2.02162	0.0575925		600.698	1.67368	1.30143		512.442	1.41022	0.331451		506.415	2.12442	0.36784						473.275	1.18555	0.467923		481.39	1.45103	0.53088
481.881	1.45504	0.54556		481.881	1.42228	0.52225		481.881	1.49201	0.39986		537.988	1.278	0.188409		522.122	1.24893	0.52598		589.874	2.02573	0.061107		600.087	1.66763	1.29758		513.083	1.40942	0.335429		505.629	2.12312	0.36934						474.052	1.18477	0.471214		482.2	1.45152	0.53428
482.69	1.4561	0.54754		482.69	1.42326	0.52568		482.69	1.49187	0.40267		538.739	1.27306	0.191499		522.823	1.24886	0.531154		589.095	2.02983	0.0648031		599.477	1.66165	1.29371		513.724	1.40867	0.339416		504.845	2.12179	0.37084						474.83	1.18401	0.474524		483.01	1.45208	0.53762
483.499	1.45715	0.54944		483.499	1.42431	0.52904		483.499	1.49178	0.40545		539.489	1.26804	0.194813		523.524	1.24886	0.536324		588.317	2.0339	0.0686844		598.869	1.65575	1.28982		514.364	1.40797	0.343412		504.063	2.12041	0.37233						475.607	1.18325	0.477855		483.82	1.45269	0.54091
484.308	1.4582	0.55125		484.308	1.42541	0.53232		484.308	1.49172	0.4082		540.24	1.26297	0.198366		524.224	1.24892	0.541489		587.541	2.03793	0.0727534		598.261	1.64993	1.28591		515.005	1.40732	0.347415		503.284	2.119	0.37381						476.385	1.18252	0.481205		484.63	1.45336	0.54414
485.117	1.45923	0.55297		485.117	1.42655	0.53553		485.117	1.4917	0.41092		540.991	1.25785	0.202174		524.925	1.24904	0.546646		586.767	2.04191	0.0770125		597.655	1.64417	1.28197		515.646	1.40672	0.351425		502.507	2.11755	0.37528						477.162	1.18179	0.484576		485.44	1.45408	0.5473
485.926	1.46024	0.5546		485.926	1.42774	0.53865		485.926	1.49172	0.41361		541.742	1.25269	0.206253		525.626	1.24921	0.551796		585.996	2.04584	0.081463		597.05	1.63848	1.27803		516.286	1.40617	0.355441		501.733	2.11605	0.37673						477.94	1.18108	0.487968		486.25	1.45485	0.5504
486.735	1.46122	0.55615		486.735	1.42897	0.5417		486.735	1.49178	0.41626		542.492	1.24752	0.210618		526.326	1.24945	0.556937		585.226	2.0497	0.0861055		596.447	1.63286	1.27406		516.927	1.40568	0.359462		500.96	2.11452	0.37817						478.717	1.18038	0.491379		487.06	1.45566	0.55344
487.544	1.46218	0.55762		487.544	1.43023	0.54467		487.544	1.49187	0.41888		543.243	1.24235	0.215283		527.027	1.24974	0.562068		584.459	2.05347	0.09094		595.844	1.62731	1.27008		517.568	1.40523	0.363487		500.191	2.11295	0.37958						479.495	1.1797	0.494812		487.87	1.45652	0.55641
488.353	1.4631	0.559		488.353	1.43153	0.54756		488.353	1.49198	0.42147		543.994	1.23721	0.220261		527.728	1.25009	0.567188		583.693	2.05715	0.0959652		595.243	1.62182	1.26609		518.208	1.40483	0.367516		499.423	2.11134	0.38098						480.272	1.17903	0.498265		488.68	1.45742	0.55931
489.162	1.46399	0.56031		489.162	1.43285	0.55037		489.162	1.49213	0.42403		544.745	1.23212	0.225565		528.428	1.25049	0.572296		582.929	2.06073	0.101179		594.643	1.6164	1.26208		518.849	1.40449	0.371547		498.659	2.10969	0.38235						481.05	1.17839	0.501739		489.49	1.45835	0.56214
489.971	1.46483	0.56153		489.971	1.4342	0.55309		489.971	1.49231	0.42654		545.495	1.22712	0.231203		529.129	1.25095	0.57739		582.168	2.06419	0.106579		594.044	1.61104	1.25806		519.489	1.40419	0.375581		497.896	2.108	0.3837						481.827	1.17776	0.505234		490.3	1.45931	0.5649
490.78	1.46563	0.56268		490.78	1.43556	0.55573		490.78	1.49251	0.42903		546.246	1.22222	0.237181		529.83	1.25146	0.582471		581.408	2.06752	0.112161		593.446	1.60575	1.25403		520.13	1.40394	0.379616		497.136	2.10628	0.38503						482.605	1.17714	0.508749		491.11	1.46031	0.56758
491.589	1.46637	0.56376		491.589	1.43694	0.55829		491.589	1.49274	0.43147		546.997	1.21748	0.243503		530.531	1.25202	0.587538		580.651	2.07071	0.11792		592.85	1.60051	1.24999		520.771	1.40373	0.383651		496.378	2.10452	0.38632						483.382	1.17655	0.512285		491.92	1.46132	0.5702
492.398	1.46706	0.56477		492.398	1.43834	0.56076		492.398	1.49299	0.43388		547.748	1.21291	0.250168		531.231	1.25264	0.592589		579.895	2.07375	0.12385		592.255	1.59533	1.24594		521.411	1.40358	0.387687		495.622	2.10272	0.38758						484.16	1.17597	0.515842		492.73	1.46236	0.57273
493.207	1.46769	0.56571		493.207	1.43974	0.56315		493.207	1.49326	0.43626		548.498	1.20856	0.257169		531.932	1.25331	0.597623		579.141	2.07663	0.129944		591.661	1.59021	1.24189		522.052	1.40347	0.391722		494.869	2.10089	0.38881						484.937	1.17542	0.51942		493.54	1.46342	0.5752
494.016	1.46825	0.56658		494.016	1.44114	0.56546		494.016	1.49355	0.43859		549.249	1.20447	0.264496		532.633	1.25402	0.602641		578.39	2.07933	0.136194		591.068	1.58515	1.23782		522.693	1.40341	0.395755		494.118	2.09902	0.39						485.715	1.17488	0.523018		494.35	1.46449	0.57759
494.825	1.46875	0.56739		494.825	1.44254	0.56769		494.825	1.49386	0.44089		550	1.20068	0.272133		533.333	1.25478	0.607641		577.64	2.08184	0.142592		590.476	1.58014	1.23375		523.333	1.40339	0.399787		493.369	2.09712	0.39116						486.493	1.17437	0.526637		495.16	1.46557	0.5799
495.634	1.46918	0.56815		495.634	1.44393	0.56984		495.634	1.49419	0.44315		550.751	1.19721	0.280057		534.034	1.25559	0.612623		576.892	2.08417	0.149127		589.886	1.57519	1.22967		523.974	1.40342	0.403816		492.622	2.09518	0.39228						487.27	1.17388	0.530276		495.97	1.46665	0.58214
496.443	1.46953	0.56885		496.443	1.44532	0.5719		496.443	1.49453	0.44538		551.502	1.19411	0.288242		534.735	1.25645	0.617586		576.146	2.08629	0.155789		589.296	1.57029	1.22558		524.615	1.4035	0.407841		491.878	2.09321	0.39336						488.048	1.17341	0.533935		496.78	1.46774	0.58431
497.252	1.46981	0.5695		497.252	1.44669	0.57389		497.252	1.49488	0.44756		552.252	1.19142	0.296654		535.435	1.25735	0.622529		575.402	2.0882	0.162566		588.708	1.56544	1.22149		525.255	1.40362	0.411863		491.136	2.09122	0.39439						488.825	1.17296	0.537614		497.59	1.46882	0.5864
498.061	1.47001	0.57011		498.061	1.44805	0.5758		498.061	1.49524	0.44971		553.003	1.18914	0.305253		536.136	1.2583	0.627453		574.66	2.08989	0.169448		588.121	1.56065	1.2174		525.896	1.40378	0.415881		490.396	2.0892	0.39538						489.603	1.17253	0.541313		498.4	1.4699	0.58842
498.87	1.47012	0.57067		498.87	1.44938	0.57764		498.87	1.49562	0.45183		553.754	1.18732	0.313998		536.837	1.25929	0.632356		573.92	2.09136	0.176421		587.536	1.5559	1.21329		526.537	1.40399	0.419894		489.658	2.08714	0.39633						490.38	1.17213	0.545033		499.21	1.47098	0.59036
499.679	1.47015	0.5712		499.679	1.4507	0.5794		499.679	1.496	0.4539		554.505	1.18597	0.32284		537.538	1.26032	0.637239		573.182	2.0926	0.183472		586.951	1.5512	1.20919		527.177	1.40424	0.423901		488.923	2.08507	0.39722						491.158	1.17175	0.548771		500.02	1.47203	0.59223
500.488	1.47009	0.57169		500.488	1.45198	0.58109		500.488	1.49639	0.45594		555.255	1.18509	0.33173		538.238	1.26139	0.642101		572.445	2.09361	0.190589		586.368	1.54655	1.20507		527.818	1.40454	0.427903		488.19	2.08297	0.39807						491.935	1.17139	0.552529		500.83	1.47308	0.59404
501.297	1.46994	0.57215		501.297	1.45323	0.5827		501.297	1.49678	0.45794		556.006	1.1847	0.340618		538.939	1.2625	0.646941		571.711	2.09438	0.197757		585.785	1.54195	1.20096		528.458	1.40487	0.431898		487.459	2.08085	0.39887						492.713	1.17106	0.556307		501.64	1.4741	0.59577
502.106	1.4697	0.57259		502.106	1.45445	0.58426		502.106	1.49718	0.4599		556.757	1.18478	0.349451		539.64	1.26365	0.65176		570.978	2.09492	0.204964		585.204	1.53739	1.19684		529.099	1.40525	0.435887		486.73	2.0787	0.39961						493.49	1.17076	0.560104		502.45	1.4751	0.59743
502.915	1.46936	0.573		502.915	1.45563	0.58574		502.915	1.49758	0.46183		557.508	1.18532	0.358181		540.34	1.26483	0.656556		570.247	2.09522	0.212195		584.624	1.53288	1.19271		529.74	1.40567	0.439869		486.004	2.07654	0.40031						494.268	1.17048	0.563919		503.26	1.47607	0.59903
503.724	1.46893	0.5734		503.724	1.45677	0.58716		503.724	1.49797	0.46373		558.258	1.18631	0.366758		541.041	1.26606	0.661331		569.519	2.09528	0.219437		584.045	1.52842	1.18859		530.38	1.40612	0.443842		485.279	2.07437	0.40094						495.045	1.17023	0.567753		504.07	1.47701	0.60056
504.533	1.46841	0.57379		504.533	1.45787	0.58852		504.533	1.49837	0.46558		559.009	1.18772	0.375141		541.742	1.26731	0.666083		568.792	2.09511	0.226678		583.468	1.52399	1.18445		531.021	1.40662	0.447808		484.557	2.07217	0.40153						495.823	1.17	0.571606		504.88	1.47792	0.60203
505.342	1.46778	0.57418		505.342	1.45892	0.58982		505.342	1.49876	0.46741		559.76	1.18951	0.383288		542.442	1.26861	0.670813		568.067	2.09471	0.233904		582.891	1.51961	1.18032		531.662	1.40716	0.451766		483.837	2.06997	0.40205						496.6	1.1698	0.575476		505.69	1.4788	0.60343
506.151	1.46705	0.57456		506.151	1.45993	0.59107		506.151	1.49915	0.4692		560.511	1.19167	0.391167		543.143	1.26993	0.67552		567.343	2.09408	0.241103		582.316	1.51527	1.17618		532.302	1.40773	0.455715		483.119	2.06776	0.40252						497.378	1.16962	0.579365		506.5	1.47963	0.60478
506.96	1.46623	0.57494		506.96	1.46088	0.59226		506.96	1.49953	0.47095		561.261	1.19414	0.398749		543.844	1.27129	0.680205		566.622	2.09322	0.248263		581.741	1.51098	1.17204		532.943	1.40835	0.459654		482.403	2.06554	0.40293						498.155	1.16948	0.583272		507.31	1.48043	0.60607
507.769	1.46531	0.57534		507.769	1.46178	0.5934		507.769	1.49991	0.47268		562.012	1.19688	0.406013		544.545	1.27268	0.684867		565.902	2.09215	0.255374		581.168	1.50672	1.16789		533.584	1.409	0.463585		481.689	2.06331	0.40328						498.933	1.16936	0.587195		508.12	1.48117	0.6073
508.578	1.46428	0.57574		508.578	1.46263	0.5945		508.578	1.50028	0.47437		562.763	1.19986	0.412944		545.245	1.2741	0.689507		565.184	2.09086	0.262424		580.596	1.5025	1.16374		534.224	1.40969	0.467505		480.978	2.06108	0.40357						499.71	1.16927	0.591136		508.93	1.48187	0.60849
509.387	1.46315	0.57617		509.387	1.46341	0.59555		509.387	1.50063	0.47603		563.514	1.20303	0.419531		545.946	1.27555	0.694124		564.469	2.08937	0.269404		580.025	1.49832	1.15959		534.865	1.41041	0.471416		480.268	2.05885	0.4038						500.488	1.16921	0.595094		509.74	1.48252	0.60962
510.196	1.46193	0.57661		510.196	1.46414	0.59656		510.196	1.50098	0.47766		564.264	1.20635	0.425772		546.647	1.27702	0.698719		563.754	2.08768	0.276304		579.456	1.49417	1.15543		535.506	1.41117	0.475317		479.561	2.05662	0.40397						501.265	1.16917	0.599069		510.55	1.48312	0.6107
511.005	1.4606	0.57709		511.005	1.46481	0.59753		511.005	1.50131	0.47926		565.015	1.20978	0.431666		547.347	1.27853	0.703292		563.042	2.08579	0.283118		578.887	1.49007	1.15127		536.146	1.41197	0.479207		478.855	2.0544	0.40407						502.043	1.16917	0.60306		511.36	1.48366	0.61174
511.814	1.45917	0.57759		511.814	1.46541	0.59847		511.814	1.50163	0.48083		565.766	1.21328	0.437222		548.048	1.28006	0.707843		562.331	2.08373	0.289836		578.319	1.486	1.1471		536.787	1.4128	0.483087		478.152	2.05218	0.40412						502.82	1.1692	0.607067		512.17	1.48415	0.61274
512.623	1.45765	0.57814		512.623	1.46596	0.59938		512.623	1.50194	0.48237		566.517	1.21683	0.442448		548.749	1.28161	0.712371		561.623	2.08149	0.296453		577.753	1.48196	1.14294		537.427	1.41366	0.486956		477.451	2.04997	0.4041						503.598	1.16925	0.61109		512.98	1.48458	0.61371
513.432	1.45602	0.57872		513.432	1.46643	0.60025		513.432	1.50223	0.48389		567.267	1.22038	0.447357		549.449	1.28319	0.716878		560.916	2.07908	0.302963		577.188	1.47797	1.13876		538.068	1.41456	0.490814		476.751	2.04778	0.40402						504.375	1.16934	0.615128		513.79	1.48494	0.61463
514.241	1.4543	0.57935		514.241	1.46684	0.6011		514.241	1.5025	0.48538		568.018	1.22391	0.451965		550.15	1.28479	0.721364		560.211	2.07652	0.309361		576.623	1.474	1.13459		538.709	1.41549	0.494661		476.054	2.0456	0.40388						505.153	1.16946	0.619182		514.6	1.48524	0.61552
515.05	1.45248	0.58003		515.05	1.46718	0.60193		515.05	1.50275	0.48684		568.769	1.2274	0.456291		550.851	1.28641	0.725829		559.507	2.07381	0.315643		576.06	1.47007	1.1304		539.349	1.41645	0.498497		475.359	2.04343	0.40368						505.93	1.1696	0.62325		515.41	1.48548	0.61639
515.859	1.45057	0.58077		515.859	1.46746	0.60274		515.859	1.50298	0.48828		569.52	1.23082	0.460353		551.552	1.28806	0.730272		558.805	2.07096	0.321804		575.498	1.46617	1.12622		539.99	1.41744	0.502321		474.666	2.04129	0.40342						506.708	1.16978	0.627333		516.22	1.48565	0.61722
516.668	1.44856	0.58156		516.668	1.46766	0.60353		516.668	1.5032	0.4897		570.27	1.23416	0.464171		552.252	1.28972	0.734696		558.106	2.06797	0.327844		574.937	1.46231	1.12203		540.631	1.41847	0.506134		473.975	2.03916	0.4031						507.486	1.16999	0.63143		517.03	1.48576	0.61804
517.477	1.44646	0.58243		517.477	1.4678	0.60431		517.477	1.50339	0.4911		571.021	1.2374	0.467766		552.953	1.29141	0.739099		557.407	2.06487	0.333758		574.378	1.45848	1.11783		541.271	1.41953	0.509936		473.286	2.03706	0.40271						508.263	1.17023	0.635541		517.84	1.4858	0.61883
518.286	1.44428	0.58335		518.286	1.46786	0.60508		518.286	1.50356	0.49248		571.772	1.24053	0.471158		553.654	1.29311	0.743483		556.711	2.06165	0.339546		573.819	1.45468	1.11363		541.912	1.42061	0.513726		472.599	2.03499	0.40227						509.041	1.17051	0.639665		518.65	1.48576	0.61961
519.095	1.442	0.58436		519.095	1.46786	0.60585		519.095	1.5037	0.49383		572.523	1.24354	0.474368		554.354	1.29483	0.747848		556.016	2.05832	0.345208		573.261	1.45091	1.10942		542.553	1.42173	0.517505		471.914	2.03295	0.40177						509.818	1.17081	0.643803		519.46	1.48566	0.62038
519.904	1.43964	0.58544		519.904	1.46778	0.60661		519.904	1.50383	0.49517		573.273	1.24642	0.477415		555.055	1.29657	0.752194		555.323	2.05489	0.350742		572.705	1.44718	1.10521		543.193	1.42287	0.521272		471.231	2.03094	0.40122						510.596	1.17115	0.647954		520.27	1.48548	0.62113
520.713	1.4372	0.5866		520.713	1.46764	0.60737		520.713	1.50392	0.49649		574.024	1.24917	0.480318		555.756	1.29833	0.756521		554.632	2.05137	0.356149		572.149	1.44347	1.10099		543.834	1.42404	0.525028		470.55	2.02897	0.40061						511.373	1.17152	0.652117		521.08	1.48524	0.62188
521.522	1.43468	0.58784		521.522	1.46742	0.60814		521.522	1.50399	0.4978		574.775	1.25179	0.483096		556.456	1.3001	0.760831		553.943	2.04777	0.361429		571.595	1.43979	1.09676		544.474	1.42525	0.528773		469.871	2.02703	0.39994						512.151	1.17193	0.656293		521.89	1.48492	0.62263
522.331	1.43208	0.58918		522.331	1.46713	0.60891		522.331	1.50404	0.49909		575.526	1.25426	0.485765		557.157	1.30188	0.765124		553.255	2.04408	0.366583		571.041	1.43615	1.09253		545.115	1.42647	0.532506		469.194	2.02513	0.39922						512.928	1.17237	0.66048		522.7	1.48453	0.62337
523.14	1.4294	0.5906		523.14	1.46677	0.60969		523.14	1.50406	0.50036		576.276	1.2566	0.488343		557.858	1.30368	0.7694		552.569	2.04033	0.371613		570.489	1.43253	1.08829		545.756	1.42773	0.536228		468.518	2.02327	0.39845						513.706	1.17284	0.664679		523.51	1.48406	0.62412
523.949	1.42666	0.59213		523.949	1.46634	0.61048		523.949	1.50405	0.50163		577.027	1.25881	0.490843		558.559	1.30549	0.773661		551.885	2.03651	0.37652		569.938	1.42895	1.08405		546.396	1.42901	0.539938		467.845	2.02146	0.39763						514.483	1.17334	0.668889		524.32	1.48352	0.62488
524.758	1.42384	0.59375		524.758	1.46584	0.61129		524.758	1.50401	0.50288		577.778	1.26088	0.49328		559.259	1.30732	0.777906		551.202	2.03263	0.381306		569.388	1.42539	1.07979		547.037	1.43032	0.543638		467.174	2.01969	0.39676						515.261	1.17388	0.67311		525.13	1.48291	0.62565
525.567	1.42096	0.59548		525.567	1.46527	0.61212		525.567	1.50395	0.50412		578.529	1.26281	0.495668		559.96	1.30915	0.782136		550.521	2.02869	0.385973		568.839	1.42186	1.07553		547.678	1.43165	0.547327		466.504	2.01797	0.39584						516.038	1.17445	0.677341		525.94	1.48223	0.62643
526.376	1.41802	0.59731		526.376	1.46463	0.61297		526.376	1.50385	0.50536		579.279	1.26462	0.498018		560.661	1.311	0.786352		549.842	2.0247	0.390523		568.291	1.41836	1.07126		548.318	1.433	0.551006		465.837	2.0163	0.39488						516.816	1.17506	0.681582		526.75	1.48147	0.62723
527.185	1.41502	0.59926		527.185	1.46393	0.61384		527.185	1.50373	0.50659		580.03	1.26631	0.500341		561.361	1.31286	0.790555		549.164	2.02067	0.394958		567.744	1.41488	1.06699		548.959	1.43438	0.554674		465.171	2.01468	0.39388						517.593	1.1757	0.685833		527.56	1.48064	0.62805
527.994	1.41196	0.60132		527.994	1.46315	0.61474		527.994	1.50357	0.50781		580.781	1.26788	0.502647		562.062	1.31473	0.794746		548.488	2.01659	0.399281		567.198	1.41144	1.0627		549.6	1.43579	0.558331		464.507	2.01311	0.39283						518.371	1.17638	0.690093		528.37	1.47974	0.62889
528.803	1.40886	0.60349		528.803	1.46231	0.61567		528.803	1.50338	0.50903		581.532	1.26933	0.504946		562.763	1.31661	0.798924		547.814	2.01248	0.403494		566.653	1.40802	1.05841		550.24	1.43722	0.561979		463.846	2.0116	0.39175						519.148	1.17709	0.694362		529.18	1.47876	0.62976
529.612	1.4057	0.60578		529.612	1.4614	0.61663		529.612	1.50317	0.51024		582.282	1.27067	0.507247		563.463	1.31849	0.803092		547.141	2.00833	0.4076		566.109	1.40463	1.0541		550.881	1.43867	0.565617		463.186	2.01014	0.39063						519.926	1.17783	0.69864		529.99	1.47772	0.63066
530.421	1.40251	0.6082		530.421	1.46043	0.61763		530.421	1.50292	0.51145		583.033	1.27191	0.509556		564.164	1.32039	0.807249		546.47	2.00415	0.411602		565.566	1.40127	1.04979		551.522	1.44014	0.569246		462.528	2.00875	0.38948						520.703	1.17862	0.702926		530.8	1.47661	0.63159
531.23	1.39927	0.61074		531.23	1.4594	0.61867		531.23	1.50264	0.51266		583.784	1.27304	0.511882		564.865	1.32229	0.811396		545.801	1.99994	0.415502		565.025	1.39793	1.04546		552.162	1.44164	0.572865		461.871	2.00741	0.3883						521.481	1.17943	0.707219		531.61	1.47542	0.63256
532.039	1.396	0.6134		532.039	1.4583	0.61974		532.039	1.50233	0.51387		584.535	1.27409	0.514229		565.566	1.3242	0.815535		545.133	1.9957	0.419302		564.484	1.39462	1.04113		552.803	1.44315	0.576476		461.217	2.00613	0.38709						522.258	1.18029	0.71152		532.42	1.47418	0.63357
532.848	1.3927	0.6162		532.848	1.45714	0.62086		532.848	1.50199	0.51509		585.285	1.27504	0.516605		566.266	1.32612	0.819667		544.467	1.99144	0.423004		563.944	1.39134	1.03679		553.443	1.44469	0.580078		460.565	2.00492	0.38585						523.036	1.18117	0.715827		533.23	1.47286	0.63462
533.657	1.38937	0.61913		533.657	1.45592	0.62203		533.657	1.50161	0.51631		586.036	1.27591	0.519013		566.967	1.32804	0.823791		543.802	1.98716	0.426613		563.406	1.38809	1.03243		554.084	1.44625	0.583672		459.914	2.00376	0.38459						523.813	1.1821	0.720142		534.04	1.47148	0.63572
534.466	1.38602	0.62219		534.466	1.45464	0.62325		534.466	1.5012	0.51753		586.787	1.2767	0.52146		567.668	1.32997	0.82791		543.14	1.98285	0.430129		562.868	1.38486	1.02807		554.725	1.44783	0.587258		459.265	2.00267	0.38331						524.591	1.18306	0.724462		534.85	1.47004	0.63687
535.275	1.38265	0.62538		535.275	1.4533	0.62451		535.275	1.50076	0.51876		587.538	1.27742	0.523949		568.368	1.33191	0.832023		542.478	1.97853	0.433554		562.331	1.38166	1.02369		555.365	1.44943	0.590838		458.618	2.00164	0.38201						525.368	1.18405	0.728788		535.66	1.46853	0.63807
536.084	1.37927	0.62871		536.084	1.45191	0.62583		536.084	1.50029	0.51999		588.288	1.27806	0.526484		569.069	1.33385	0.836133		541.819	1.97419	0.436893		561.796	1.37848	1.0193		556.006	1.45105	0.59441		457.973	2.00068	0.3807						526.146	1.18509	0.733119		536.47	1.46696	0.63932
536.893	1.37588	0.63218		536.893	1.45047	0.62721		536.893	1.49979	0.52124		589.039	1.27865	0.529069		569.77	1.33579	0.840239		541.161	1.96984	0.440145		561.261	1.37534	1.0149		556.647	1.45269	0.597976		457.33	1.99978	0.37937						526.923	1.18616	0.737456		537.28	1.46534	0.64063
537.702	1.37249	0.6358		537.702	1.44897	0.62864		537.702	1.49925	0.52249		589.79	1.27917	0.531706		570.47	1.33774	0.844343		540.504	1.96547	0.443314		560.728	1.37221	1.01048		557.287	1.45435	0.601536		456.688	1.99895	0.37804						527.701	1.18726	0.741796		538.09	1.46366	0.642
538.511	1.3691	0.63955		538.511	1.44742	0.63013		538.511	1.49868	0.52376		590.541	1.27964	0.534399		571.171	1.3397	0.848447		539.849	1.96108	0.4464		560.195	1.36912	1.00606		557.928	1.45603	0.605091		456.049	1.99818	0.37669						528.478	1.18841	0.746141		538.9	1.46192	0.64343
539.32	1.36571	0.64344		539.32	1.44582	0.63169		539.32	1.49808	0.52503		591.291	1.28006	0.53715		571.872	1.34166	0.85255		539.196	1.95668	0.449407		559.664	1.36605	1.00162		558.569	1.45773	0.60864		455.411	1.99748	0.37535						529.256	1.18958	0.750489		539.71	1.46013	0.64493
540.129	1.36234	0.64748		540.129	1.44417	0.63331		540.129	1.49745	0.52633		592.042	1.28044	0.539962		572.573	1.34362	0.856654		538.544	1.95227	0.452336		559.133	1.36301	0.997163		559.209	1.45944	0.612186		454.774	1.99684	0.374						530.034	1.1908	0.75484		540.52	1.45829	0.64649
540.938	1.35899	0.65166		540.938	1.44248	0.635		540.938	1.49678	0.52763		592.793	1.28077	0.542836		573.273	1.34559	0.860761		537.894	1.94785	0.455188		558.604	1.36	0.992696		559.85	1.46118	0.615728		454.14	1.99626	0.37265						530.811	1.19205	0.759194		541.33	1.4564	0.64813
541.747	1.35565	0.65599		541.747	1.44075	0.63676		541.747	1.49609	0.52896		593.544	1.28107	0.545775		573.974	1.34756	0.864871		537.246	1.94342	0.457964		558.075	1.35701	0.988215		560.49	1.46293	0.619266		453.507	1.99575	0.37131						531.589	1.19334	0.76355		542.14	1.45447	0.64983
542.556	1.35234	0.66046		542.556	1.43897	0.63859		542.556	1.49536	0.5303		594.294	1.28134	0.548781		574.675	1.34954	0.868985		536.599	1.93897	0.460666		557.548	1.35405	0.983719		561.131	1.4647	0.622802		452.877	1.99531	0.36997						532.366	1.19467	0.767908		542.95	1.45249	0.65162
543.365	1.34907	0.66507		543.365	1.43715	0.64049		543.365	1.4946	0.53166		595.045	1.28157	0.551855		575.375	1.35152	0.873105		535.953	1.93452	0.463296		557.021	1.35112	0.979209		561.772	1.46649	0.626336		452.247	1.99492	0.36864						533.144	1.19604	0.772267		543.76	1.45047	0.65348
544.174	1.34583	0.66983		544.174	1.4353	0.64247		544.174	1.49381	0.53304		595.796	1.28178	0.554998		576.076	1.3535	0.877232		535.31	1.93005	0.465854		556.496	1.34821	0.974683		562.412	1.46829	0.629869		451.62	1.9946	0.36733						533.921	1.19744	0.776627		544.57	1.44841	0.65541
544.983	1.34263	0.67474		544.983	1.43341	0.64452		544.983	1.493	0.53444		596.547	1.28197	0.558211		576.777	1.35549	0.881367		534.667	1.92557	0.468342		555.971	1.34533	0.970142		563.053	1.47012	0.633401		450.994	1.99434	0.36602						534.699	1.19888	0.780988		545.38	1.44631	0.65743
545.792	1.33948	0.67979		545.792	1.43149	0.64665		545.792	1.49215	0.53587		597.297	1.28215	0.561497		577.477	1.35748	0.885511		534.027	1.92109	0.47076		555.448	1.34248	0.965585		563.694	1.47196	0.636934		450.371	1.99414	0.36474						535.476	1.20035	0.785348		546.19	1.44418	0.65953
546.601	1.33638	0.68498		546.601	1.42953	0.64887		546.601	1.49127	0.53732		598.048	1.2823	0.564856		578.178	1.35947	0.889666		533.387	1.91659	0.473109		554.925	1.33966	0.961013		564.334	1.47382	0.640467		449.748	1.99399	0.36347						536.254	1.20187	0.789707		547	1.44202	0.66172
547.41	1.33335	0.69031		547.41	1.42755	0.65116		547.41	1.49036	0.5388		598.799	1.28246	0.568289		578.879	1.36147	0.893833		532.75	1.91208	0.47539		554.404	1.33687	0.956424		564.975	1.4757	0.644002		449.128	1.99391	0.36223						537.031	1.20342	0.794066		547.81	1.43983	0.66399
548.219	1.33037	0.69579		548.219	1.42554	0.65354		548.219	1.48942	0.5403		599.55	1.2826	0.571797		579.58	1.36347	0.898013		532.113	1.90757	0.477604		553.883	1.3341	0.951818		565.616	1.4776	0.647539		448.509	1.99388	0.36101						537.809	1.20501	0.798423		548.62	1.43762	0.66635
549.028	1.32746	0.70141		549.028	1.42351	0.65601		549.028	1.48846	0.54183		600.3	1.28274	0.575381		580.28	1.36548	0.902208		531.479	1.90304	0.479751		553.364	1.33136	0.947196		566.256	1.47951	0.651079		447.892	1.9939	0.35981						538.586	1.20664	0.802778		549.43	1.43538	0.66881
549.837	1.32463	0.70716		549.837	1.42146	0.65856		549.837	1.48747	0.54339		601.051	1.28288	0.579042		580.981	1.36749	0.906418		530.846	1.89851	0.481832		552.845	1.32865	0.942557		566.897	1.48144	0.654624		447.277	1.99398	0.35864						539.364	1.2083	0.80713		550.24	1.43312	0.67135
550.646	1.32187	0.71306		550.646	1.41939	0.6612		550.646	1.48645	0.54498		601.802	1.28303	0.58278		581.682	1.36951	0.910646		530.214	1.89397	0.483846		552.327	1.32597	0.9379		567.538	1.4834	0.658173		446.663	1.99411	0.3575						540.141	1.21	0.811479		551.05	1.43085	0.67398
551.455	1.3192	0.71908		551.455	1.4173	0.66393		551.455	1.48541	0.5466		602.553	1.28319	0.586596		582.382	1.37153	0.914892		529.584	1.88942	0.485795		551.811	1.32332	0.933226		568.178	1.48537	0.661727		446.051	1.99428	0.35639						540.919	1.21174	0.815824		551.86	1.42857	0.67671
552.264	1.31662	0.72524		552.264	1.4152	0.66676		552.264	1.48434	0.54826		603.303	1.28336	0.590491		583.083	1.37356	0.919159		528.955	1.88486	0.487679		551.295	1.3207	0.928533		568.819	1.48736	0.665289		445.441	1.99451	0.35532						541.696	1.21352	0.820165		552.67	1.42627	0.67954
553.073	1.31413	0.73154		553.073	1.41309	0.66968		553.073	1.48324	0.54995		604.054	1.28354	0.594464		583.784	1.37559	0.923447		528.328	1.88029	0.489498		550.78	1.31812	0.923823		569.459	1.48937	0.668857		444.832	1.99478	0.35428						542.474	1.21533	0.824502		553.48	1.42397	0.68246
553.882	1.31175	0.73796		553.882	1.41097	0.67269		553.882	1.48212	0.55167		604.805	1.28374	0.598517		584.484	1.37764	0.927759		527.702	1.87571	0.491251		550.267	1.31556	0.919094		570.1	1.4914	0.672434		444.225	1.9951	0.35327						543.251	1.21718	0.828833		554.29	1.42167	0.68548
554.691	1.30946	0.7445		554.691	1.40885	0.6758		554.691	1.48098	0.55343		605.556	1.28396	0.60265		585.185	1.37969	0.932095		527.078	1.87113	0.49294		549.754	1.31303	0.914347		570.741	1.49345	0.676019		443.62	1.99546	0.35231						544.029	1.21907	0.833158		555.1	1.41936	0.68859
555.5	1.30728	0.75117		555.5	1.40673	0.679		555.5	1.47981	0.55523		606.306	1.28421	0.606863		585.886	1.38175	0.936458		526.455	1.86653	0.494564		549.242	1.31053	0.909581		571.381	1.49552	0.679615		443.016	1.99585	0.35138						544.806	1.22099	0.837477		555.91	1.41706	0.69181
556.309	1.30522	0.75796		556.309	1.40461	0.6823		556.309	1.47863	0.55706		607.057	1.28449	0.611156		586.587	1.38381	0.940849		525.834	1.86193	0.496123		548.731	1.30806	0.904795		572.022	1.49762	0.683222		442.414	1.99629	0.35049						545.584	1.22296	0.841788		556.72	1.41476	0.69512
557.118	1.30328	0.76486		557.118	1.40249	0.6857		557.118	1.47742	0.55894		607.808	1.2848	0.61553		587.287	1.38589	0.945268		525.214	1.85733	0.497617		548.221	1.30563	0.899991		572.663	1.49974	0.686841		441.814	1.99676	0.34964						546.361	1.22496	0.846093		557.53	1.41248	0.69853
557.927	1.30145	0.77188		557.927	1.40038	0.6892		557.927	1.47619	0.56085		608.559	1.28515	0.619984		587.988	1.38798	0.949719		524.596	1.85271	0.499045		547.712	1.30323	0.895167		573.303	1.50188	0.690473		441.215	1.99727	0.34884						547.139	1.22699	0.850389		558.34	1.41021	0.70205
558.736	1.29975	0.77901		558.736	1.39829	0.6928		558.736	1.47494	0.56281		609.309	1.28554	0.624519		588.689	1.39009	0.954203		523.979	1.8481	0.500409		547.204	1.30086	0.890323		573.944	1.50404	0.694118		440.618	1.9978	0.34808						547.916	1.22906	0.854676		559.15	1.40796	0.70566
559.545	1.29819	0.78624		559.545	1.3962	0.6965		559.545	1.47368	0.56481		610.06	1.28597	0.629135		589.389	1.3922	0.958721		523.364	1.84347	0.501708		546.697	1.29853	0.88546		574.585	1.50623	0.697778		440.022	1.99837	0.34736						548.694	1.23117	0.858954		559.96	1.40572	0.70937
560.354	1.29676	0.79357		560.354	1.39414	0.70031		560.354	1.47239	0.56685		610.811	1.28645	0.633831		590.09	1.39434	0.963275		522.75	1.83884	0.502941		546.19	1.29623	0.880577		575.225	1.50845	0.701454		439.429	1.99896	0.34668						549.471	1.23332	0.863221		560.77	1.40352	0.71319
561.163	1.29546	0.801		561.163	1.39209	0.70421		561.163	1.47109	0.56894		611.562	1.28698	0.638607		590.791	1.39648	0.967867		522.137	1.83421	0.504108		545.685	1.29396	0.875674		575.866	1.51069	0.705147		438.836	1.99958	0.34605						550.249	1.2355	0.867478		561.58	1.40134	0.7171
561.972	1.29431	0.80852		561.972	1.39008	0.70822		561.972	1.46977	0.57108		612.312	1.28756	0.643463		591.491	1.39865	0.972498		521.526	1.82957	0.505209		545.181	1.29173	0.87075		576.507	1.51297	0.708857		438.245	2.00022	0.34547						551.027	1.23771	0.871724		562.39	1.39919	0.72112
562.781	1.2933	0.81612		562.781	1.38809	0.71233		562.781	1.46844	0.57326		613.063	1.28821	0.648398		592.192	1.40083	0.977171		520.916	1.82493	0.506244		544.677	1.28953	0.865807		577.147	1.51527	0.712586		437.656	2.00088	0.34493						551.804	1.23997	0.875958		563.2	1.39707	0.72523
563.59	1.29244	0.82381		563.59	1.38613	0.71655		563.59	1.4671	0.57548		613.814	1.28891	0.653413		592.893	1.40304	0.981886		520.308	1.82028	0.507213		544.175	1.28737	0.860842		577.788	1.51761	0.716334		437.069	2.00156	0.34444						552.582	1.24225	0.880179		564.01	1.395	0.72944
564.399	1.29174	0.83158		564.399	1.38421	0.72086		564.399	1.46574	0.57776		614.565	1.28968	0.658505		593.594	1.40527	0.986646		519.701	1.81563	0.508116		543.673	1.28525	0.855858		578.428	1.51997	0.720102		436.483	2.00226	0.34399						553.359	1.24457	0.884387		564.82	1.39297	0.73375
565.208	1.29119	0.83943		565.208	1.38232	0.72528		565.208	1.46438	0.58009		615.315	1.29052	0.663675		594.294	1.40752	0.991452		519.096	1.81099	0.508951		543.173	1.28316	0.850853		579.069	1.52238	0.723892		435.898	2.00297	0.34359						554.137	1.24693	0.88858		565.63	1.39098	0.73816
566.017	1.29079	0.84734		566.017	1.38048	0.72981		566.017	1.463	0.58247		616.066	1.29144	0.668922		594.995	1.4098	0.996306		518.492	1.80634	0.50972		542.673	1.28112	0.845827		579.71	1.52482	0.727704		435.316	2.0037	0.34323						554.914	1.24932	0.892759		566.44	1.38904	0.74266
566.826	1.29056	0.85531		566.826	1.37869	0.73443		566.826	1.46161	0.58489		616.817	1.29243	0.674245		595.696	1.41211	1.00121		517.889	1.80169	0.510421		542.174	1.27911	0.840781		580.35	1.52729	0.731538		434.734	2.00443	0.34292						555.692	1.25174	0.896923		567.25	1.38716	0.74726
567.635	1.29048	0.86334		567.635	1.37695	0.73916		567.635	1.46022	0.58737		617.568	1.29351	0.679641		596.396	1.41445	1.00617		517.288	1.79704	0.511055		541.677	1.27714	0.835714		580.991	1.52981	0.735395		434.154	2.00518	0.34266						556.469	1.2542	0.901071		568.06	1.38533	0.75195
568.444	1.29057	0.87142		568.444	1.37526	0.74399		568.444	1.45882	0.58991		618.318	1.29468	0.685111		597.097	1.41683	1.01117		516.688	1.7924	0.511621		541.18	1.2752	0.830626		581.632	1.53237	0.739277		433.576	2.00593	0.34244						557.247	1.25669	0.905201		568.87	1.38357	0.75673
569.253	1.29083	0.87955		569.253	1.37363	0.74892		569.253	1.45741	0.5925		619.069	1.29593	0.690652		597.798	1.41924	1.01624		516.09	1.78776	0.51212		540.684	1.27331	0.825518		582.272	1.53498	0.743183		433	2.00668	0.34226						558.024	1.25921	0.909315		569.68	1.38186	0.7616
570.062	1.29125	0.88772		570.062	1.37207	0.75394		570.062	1.456	0.59514		619.82	1.29729	0.696263		598.498	1.4217	1.02136		515.493	1.78312	0.51255		540.188	1.27146	0.820389		582.913	1.53763	0.747115		432.425	2.00744	0.34213						558.802	1.26176	0.91341		570.49	1.38023	0.76657
570.871	1.29185	0.89593		570.871	1.37057	0.75907		570.871	1.45459	0.59784		620.571	1.29874	0.701942		599.199	1.42419	1.02653		514.897	1.77849	0.512913		539.694	1.26965	0.81524		583.554	1.54033	0.751072		431.851	2.0082	0.34204						559.579	1.26434	0.917486		571.3	1.37866	0.77161
571.68	1.29261	0.90417		571.68	1.36914	0.76429		571.68	1.45318	0.60059		621.321	1.3003	0.707686		599.9	1.42673	1.03177		514.303	1.77386	0.513207		539.201	1.26789	0.81007		584.194	1.54308	0.755054		431.279	2.00896	0.34199						560.357	1.26696	0.921542		572.11	1.37716	0.77675
572.489	1.29354	0.91243		572.489	1.36778	0.76961		572.489	1.45176	0.6034		622.072	1.30196	0.713494		600.601	1.42932	1.03707		513.71	1.76925	0.513432		538.708	1.26617	0.804881		584.835	1.54589	0.759062		430.708	2.00972	0.34199						561.134	1.2696	0.925578		572.92	1.37575	0.78196
573.298	1.29465	0.92071		573.298	1.3665	0.77502		573.298	1.45035	0.60627		622.823	1.30374	0.719362		601.301	1.43197	1.04243		513.118	1.76464	0.51359		538.217	1.26449	0.79967		585.475	1.54876	0.763096		430.139	2.01047	0.34203						561.912	1.27227	0.929593		573.73	1.37441	0.78726
574.107	1.29592	0.929		574.107	1.36531	0.78052		574.107	1.44894	0.60919		623.574	1.30564	0.725288		602.002	1.43467	1.04785		512.528	1.76004	0.513678		537.726	1.26285	0.79444		586.116	1.55169	0.767156		429.572	2.01122	0.34211						562.689	1.27496	0.933586		574.54	1.37315	0.79263
574.916	1.29737	0.9373		574.916	1.3642	0.78611		574.916	1.44754	0.61218		624.324	1.30766	0.731269		602.703	1.43744	1.05334		511.939	1.75545	0.513699		537.237	1.26126	0.78919		586.757	1.55469	0.771241		429.006	2.01196	0.34222						563.467	1.27769	0.937556		575.35	1.37198	0.79808
575.725	1.29899	0.94561		575.725	1.36318	0.79179		575.725	1.44614	0.61523		625.075	1.30981	0.7373		603.403	1.44027	1.05889		511.352	1.75087	0.513651		536.748	1.25972	0.783921		587.397	1.55775	0.775351		428.441	2.01269	0.34238						564.244	1.28043	0.941503		576.16	1.3709	0.8036
576.534	1.30079	0.9539		576.534	1.36226	0.79756		576.534	1.44476	0.61833		625.826	1.31209	0.743379		604.104	1.44317	1.06451		510.766	1.74631	0.513534		536.26	1.25822	0.778632		588.038	1.56088	0.779484		427.878	2.01341	0.34258						565.022	1.28321	0.945426		576.97	1.3699	0.80919
577.343	1.30275	0.96219		577.343	1.36143	0.80341		577.343	1.44338	0.6215		626.577	1.31451	0.749501		604.805	1.44615	1.07019		510.181	1.74176	0.51335		535.773	1.25677	0.773324		588.679	1.56409	0.783641		427.316	2.01412	0.34281						565.799	1.286	0.949325		577.78	1.369	0.81485
578.152	1.30489	0.97047		578.152	1.3607	0.80933		578.152	1.44201	0.62472		627.327	1.31707	0.755662		605.506	1.44921	1.07595		509.597	1.73722	0.513097		535.286	1.25537	0.767997		589.319	1.56738	0.787818		426.756	2.01482	0.34307						566.577	1.28881	0.953199		578.59	1.3682	0.82057
578.961	1.30719	0.97872		578.961	1.36008	0.81534		578.961	1.44065	0.62801		628.078	1.31978	0.761857		606.206	1.45236	1.08177		509.015	1.73271	0.512776		534.801	1.25402	0.762651		589.96	1.57075	0.792016		426.197	2.01551	0.34338						567.354	1.29165	0.957047		579.4	1.36749	0.82635
579.77	1.30966	0.98695		579.77	1.35957	0.82141		579.77	1.43931	0.63136		628.829	1.32263	0.76808		606.907	1.45559	1.08765		508.435	1.72821	0.512388		534.317	1.25271	0.757287		590.601	1.57421	0.796232		425.64	2.01618	0.34371						568.132	1.2945	0.960869		580.21	1.36689	0.83219
580.579	1.31231	0.99514		580.579	1.35916	0.82756		580.579	1.43799	0.63478		629.58	1.32564	0.774327		607.608	1.45893	1.0936		507.855	1.72373	0.511932		533.833	1.25146	0.751905		591.241	1.57776	0.800463		425.084	2.01683	0.34408						568.909	1.29737	0.964664		581.02	1.36638	0.83808
581.388	1.31511	1.0033		581.388	1.35887	0.83377		581.388	1.43668	0.63825		630.33	1.32881	0.780591		608.308	1.46237	1.09962		507.277	1.71927	0.511408		533.351	1.25026	0.746506		591.882	1.58141	0.804708		424.53	2.01747	0.34448						569.687	1.30026	0.968432		581.83	1.36598	0.84402
582.197	1.31809	1.01142		582.197	1.3587	0.84005		582.197	1.43539	0.64179		631.081	1.33214	0.786866		609.009	1.46593	1.1057		506.7	1.71483	0.510818		532.869	1.24911	0.74109		592.523	1.58515	0.808962		423.977	2.01809	0.34491						570.464	1.30315	0.972173		582.64	1.36569	0.85001
583.006	1.32122	1.01949		583.006	1.35865	0.84638		583.006	1.43413	0.64539		631.832	1.33564	0.793144		609.71	1.4696	1.11185		506.125	1.71042	0.510162		532.388	1.24801	0.735657		593.163	1.589	0.813223		423.426	2.01869	0.34537						571.242	1.30606	0.975887		583.45	1.3655	0.85604
583.815	1.32451	1.0275		583.815	1.35872	0.85277		583.815	1.43289	0.64906		632.583	1.33931	0.79942		610.41	1.47339	1.11805		505.55	1.70603	0.509439		531.908	1.24697	0.730208		593.804	1.59296	0.817486		422.876	2.01928	0.34585						572.02	1.30897	0.979572		584.26	1.36542	0.86212
584.624	1.32797	1.03546		584.624	1.35892	0.85921		584.624	1.43167	0.65279		633.333	1.34315	0.805684		611.111	1.47732	1.12432		504.977	1.70167	0.508651		531.429	1.24598	0.724743		594.444	1.59703	0.821748		422.327	2.01984	0.34637						572.797	1.31189	0.983231		585.07	1.36545	0.86823
585.433	1.33158	1.04336		585.433	1.35925	0.8657		585.433	1.43048	0.65658		634.084	1.34716	0.81193		611.812	1.48139	1.13063		504.406	1.69734	0.507798		530.95	1.24505	0.719263		595.085	1.60121	0.826002		421.78	2.02038	0.34691						573.575	1.31482	0.986862		585.88	1.36559	0.87437
586.242	1.33534	1.05118		586.242	1.35971	0.87223		586.242	1.42932	0.66044		634.835	1.35136	0.818148		612.513	1.4856	1.137		503.835	1.69303	0.50688		530.473	1.24417	0.713769		595.726	1.60551	0.830245		421.234	2.0209	0.34747						574.352	1.31774	0.990465		586.69	1.36584	0.88054
587.051	1.33925	1.05894		587.051	1.3603	0.87879		587.051	1.42819	0.66436		635.586	1.35573	0.824329		613.213	1.48997	1.14342		503.266	1.68875	0.505899		529.996	1.24335	0.70826		596.366	1.60994	0.834469		420.69	2.0214	0.34805						575.13	1.32067	0.994043		587.5	1.36621	0.88673
587.86	1.3433	1.06662		587.86	1.36103	0.88539		587.86	1.4271	0.66835		636.336	1.36028	0.830465		613.914	1.4945	1.14988		502.699	1.68451	0.504854		529.52	1.24259	0.702739		597.007	1.61449	0.838669		420.147	2.02188	0.34866						575.907	1.32359	0.997594		588.31	1.36669	0.89294
588.669	1.34751	1.07421		588.669	1.36189	0.89201		588.669	1.42604	0.6724		637.087	1.36502	0.836544		614.615	1.49921	1.15637		502.132	1.68029	0.503746		529.045	1.24189	0.697205		597.648	1.61917	0.842837		419.606	2.02234	0.34929						576.685	1.3265	1.00112		589.12	1.36728	0.89917
589.478	1.35185	1.08172		589.478	1.36289	0.89865		589.478	1.42502	0.67652		637.838	1.36993	0.842558		615.315	1.50409	1.16289		501.567	1.67611	0.502577		528.571	1.24124	0.691659		598.288	1.62398	0.846966		419.066	2.02277	0.34994						577.462	1.32939	1.00462		589.93	1.36799	0.90542
590.287	1.35633	1.08914		590.287	1.36403	0.90531		590.287	1.42404	0.68069		638.589	1.37503	0.848496		616.016	1.50916	1.16943		501.003	1.67197	0.501346		528.098	1.24066	0.686102		598.929	1.62892	0.851048		418.527	2.02317	0.3506						578.24	1.33228	1.00811		590.74	1.36881	0.91167
591.096	1.36094	1.09647		591.096	1.3653	0.91199		591.096	1.4231	0.68493		639.339	1.38031	0.854346		616.717	1.51442	1.17598		500.44	1.66786	0.500055		527.626	1.24013	0.680534		599.57	1.634	0.855075		417.99	2.02356	0.35128						579.017	1.33515	1.01157		591.55	1.36974	0.91793
591.905	1.36568	1.1037		591.905	1.36672	0.91866		591.905	1.4222	0.68924		640.09	1.38577	0.860098		617.417	1.51988	1.18254		499.879	1.66379	0.498704		527.154	1.23967	0.674957		600.21	1.63921	0.859037		417.454	2.02392	0.35198						579.795	1.33799	1.01501		592.36	1.37079	0.92419
592.714	1.37054	1.11082		592.714	1.36828	0.92534		592.714	1.42135	0.6936		640.841	1.3914	0.865741		618.118	1.52555	1.18909		499.319	1.65976	0.497295		526.684	1.23927	0.669371		600.851	1.64456	0.862926		416.919	2.02425	0.35269						580.572	1.34081	1.01844		593.17	1.37195	0.93045
593.523	1.37553	1.11784		593.523	1.36999	0.93201		593.523	1.42055	0.69803		641.592	1.39721	0.871263		618.819	1.53143	1.19562		498.76	1.65576	0.495828		526.214	1.23893	0.663777		601.491	1.65004	0.866732		416.386	2.02456	0.35342						581.35	1.3436	1.02186		593.98	1.37322	0.9367
594.332	1.38063	1.12475		594.332	1.37183	0.93868		594.332	1.4198	0.70252		642.342	1.40318	0.876652		619.52	1.53753	1.20212		498.202	1.65181	0.494304		525.745	1.23866	0.658177		602.132	1.65565	0.870444		415.854	2.02485	0.35415						582.127	1.34636	1.02527		594.79	1.37461	0.94295
595.141	1.38585	1.13155		595.141	1.37381	0.94532		595.141	1.41911	0.70707		643.093	1.40931	0.881898		620.22	1.54386	1.20857		497.646	1.6479	0.492724		525.277	1.23845	0.65257		602.773	1.66138	0.874054		415.323	2.02511	0.3549						582.905	1.34909	1.02868		595.6	1.37611	0.94918
595.95	1.39117	1.13824		595.95	1.37593	0.95195		595.95	1.41847	0.71169		643.844	1.4156	0.886989		620.921	1.55042	1.21496		497.091	1.64403	0.49109		524.809	1.2383	0.646959		603.413	1.66725	0.87755		414.794	2.02535	0.35566						583.682	1.35177	1.03209		596.41	1.37771	0.95539
596.759	1.3966	1.1448		596.759	1.37819	0.95855		596.759	1.41789	0.71636		644.595	1.42203	0.891915		621.622	1.55721	1.22128		496.537	1.6402	0.489401		524.343	1.23822	0.641343		604.054	1.67323	0.880924		414.266	2.02556	0.35643						584.46	1.35441	1.0355		597.22	1.37943	0.96158
597.568	1.40212	1.15125		597.568	1.38059	0.96511		597.568	1.41736	0.72108		645.345	1.4286	0.896664		622.322	1.56423	1.2275		495.984	1.63642	0.48766		523.877	1.23821	0.635725		604.695	1.67932	0.884165		413.74	2.02575	0.3572						585.237	1.35701	1.03893		598.03	1.38125	0.96775
598.377	1.40774	1.15757		598.377	1.38312	0.97164		598.377	1.4169	0.72587		646.096	1.4353	0.901226		623.023	1.57148	1.23362		495.433	1.63269	0.485867		523.412	1.23826	0.630104		605.335	1.68552	0.887263		413.215	2.02591	0.35798						586.015	1.35956	1.04238		598.84	1.38318	0.97389
599.186	1.41345	1.16376		599.186	1.38579	0.97812		599.186	1.41651	0.73071		646.847	1.44211	0.905592		623.724	1.57897	1.23961		494.882	1.629	0.484024		522.948	1.23838	0.624483		605.976	1.69182	0.890211		412.691	2.02605	0.35877						586.792	1.36206	1.04585		599.65	1.38521	0.98
599.995	1.41923	1.16983		599.995	1.38859	0.98456		599.995	1.41618	0.73561		647.598	1.44903	0.909753		624.424	1.58669	1.24545		494.333	1.62536	0.482131		522.485	1.23857	0.618862		606.617	1.69821	0.892999		412.168	2.02617	0.35956						587.57	1.36451	1.04936		600.46	1.38735	0.98607
600.804	1.4251	1.17577		600.804	1.39152	0.99094		600.804	1.41593	0.74056		648.348	1.45603	0.913701		625.125	1.59463	1.25112		493.786	1.62177	0.48019		522.023	1.23883	0.613243		607.257	1.70467	0.895621		411.647	2.02626	0.36036						588.347	1.3669	1.05291		601.27	1.38959	0.99211
601.613	1.43104	1.18158		601.613	1.39457	0.99726		601.613	1.41574	0.74556		649.099	1.46311	0.917429		625.826	1.60279	1.25661		493.239	1.61823	0.478202		521.561	1.23915	0.607627		607.898	1.7112	0.898069		411.127	2.02633	0.36116						589.125	1.36924	1.05652		602.08	1.39192	0.99811
602.422	1.43705	1.18725		602.422	1.39775	1.00352		602.422	1.41563	0.75061		649.85	1.47026	0.920932		626.527	1.61116	1.2619		492.694	1.61474	0.476168		521.1	1.23955	0.602014		608.539	1.71779	0.900338		410.609	2.02637	0.36196						589.902	1.37153	1.06019		602.89	1.39436	1.00406
603.231	1.44311	1.19279		603.231	1.40105	1.00972		603.231	1.4156	0.75571		650.601	1.47744	0.924205		627.227	1.61973	1.26696		492.15	1.61129	0.474089		520.641	1.24001	0.596407		609.179	1.72442	0.902424		410.092	2.02639	0.36276						590.68	1.37377	1.06394		603.7	1.39688	1.00997
604.04	1.44924	1.1982		604.04	1.40447	1.01583		604.04	1.41564	0.76086		651.351	1.48465	0.927245		627.928	1.62849	1.27178		491.607	1.6079	0.471968		520.181	1.24055	0.590806		609.82	1.73107	0.904323		409.576	2.02639	0.36356						591.457	1.37597	1.06777		604.51	1.3995	1.01583
604.849	1.45541	1.20347		604.849	1.408	1.02188		604.849	1.41577	0.76605		652.102	1.49187	0.93005		628.629	1.63741	1.27634		491.065	1.60457	0.469804		519.723	1.24115	0.585214		610.46	1.73774	0.906035		409.061	2.02637	0.36436						592.235	1.37812	1.0717		605.32	1.40221	1.02164
605.658	1.46163	1.2086		605.658	1.41163	1.02784		605.658	1.41598	0.77129		652.853	1.49908	0.932622		629.329	1.64648	1.28062		490.524	1.60128	0.467599		519.266	1.24183	0.57963		611.101	1.74441	0.907558		408.548	2.02632	0.36516						593.012	1.38024	1.07573		606.13	1.40501	1.02739
606.467	1.46789	1.2136		606.467	1.41538	1.03371		606.467	1.41628	0.77657		653.604	1.50627	0.934961		630.03	1.65569	1.28462		489.985	1.59805	0.465355		518.809	1.24258	0.574057		611.742	1.75106	0.908894		408.036	2.02625	0.36595						593.79	1.38232	1.07989		606.94	1.40789	1.03309
607.276	1.47419	1.21847		607.276	1.41922	1.0395		607.276	1.41666	0.78188		654.354	1.51341	0.937071		630.731	1.665	1.2883		489.447	1.59487	0.463072		518.353	1.2434	0.568496		612.382	1.75768	0.910046		407.525	2.02616	0.36675						594.568	1.38439	1.08417		607.75	1.41085	1.03873
608.085	1.48051	1.22319		608.085	1.42316	1.0452		608.085	1.41714	0.78723		655.105	1.52049	0.938959		631.431	1.6744	1.29167		488.91	1.59175	0.460753		517.898	1.24429	0.562948		613.023	1.76426	0.911018		407.016	2.02605	0.36753						595.345	1.38645	1.0886		608.56	1.41389	1.04431
608.894	1.48686	1.22779		608.894	1.42719	1.0508		608.894	1.41771	0.79262		655.856	1.52749	0.94063		632.132	1.68386	1.29472		488.374	1.58868	0.458398		517.444	1.24525	0.557415		613.664	1.77078	0.911816		406.507	2.02592	0.36832						596.123	1.38851	1.09318		609.37	1.41701	1.04983
609.703	1.49322	1.23224		609.703	1.43131	1.0563		609.703	1.41837	0.79803		656.607	1.53439	0.942094		632.833	1.69336	1.29743		487.839	1.58567	0.456009		516.99	1.24628	0.551899		614.304	1.77724	0.912448		406	2.02577	0.3691						596.9	1.39059	1.09792		610.18	1.4202	1.05528
610.512	1.4996	1.23657		610.512	1.43551	1.0617		610.512	1.41913	0.80347		657.357	1.54118	0.943361		633.534	1.70285	1.29981		487.306	1.58271	0.453588		516.537	1.24739	0.5464		614.945	1.78361	0.912921		405.495	2.0256	0.36987						597.678	1.39271	1.10282		610.99	1.42346	1.06067
611.321	1.50598	1.24076		611.321	1.43979	1.067		611.321	1.41999	0.80894		658.108	1.54784	0.944445		634.234	1.71232	1.30186		486.773	1.57981	0.451134		516.085	1.24856	0.54092		615.586	1.78989	0.913245		404.99	2.02541	0.37064						598.455	1.39487	1.1079		611.8	1.42679	1.06599
612.13	1.51236	1.24483		612.13	1.44414	1.0722		612.13	1.42094	0.81443		658.859	1.55435	0.945358		634.935	1.72174	1.30357		486.242	1.57697	0.448651		515.634	1.24981	0.53546		616.226	1.79607	0.913431		404.487	2.02521	0.37139						599.233	1.39711	1.11316		612.61	1.43019	1.07125
612.939	1.51875	1.24876		612.939	1.44855	1.07729		612.939	1.422	0.81994		659.61	1.56071	0.946117		635.636	1.73108	1.30496		485.712	1.57418	0.446138		515.184	1.25113	0.530023		616.867	1.80214	0.913491		403.985	2.02498	0.37214						600.01	1.39944	1.11859		613.42	1.43364	1.07643
613.748	1.52512	1.25257		613.748	1.45303	1.08227		613.748	1.42317	0.82546		660.36	1.56691	0.946737		636.336	1.7403	1.30604		485.183	1.57145	0.443598		514.734	1.25253	0.52461		617.508	1.80809	0.913436		403.485	2.02474	0.37289						600.788	1.40188	1.1242		614.23	1.43716	1.08154
614.557	1.53148	1.25626		614.557	1.45756	1.08714		614.557	1.42443	0.83099		661.111	1.57293	0.947236		637.037	1.74939	1.3068		484.655	1.56878	0.441032		514.286	1.25399	0.519221		618.148	1.81391	0.91328		402.985	2.02448	0.37362						601.565	1.40445	1.12998		615.04	1.44072	1.08658
615.366	1.53782	1.25982		615.366	1.46214	1.0919		615.366	1.42581	0.83653		661.862	1.57877	0.947633		637.738	1.75831	1.30729		484.129	1.56617	0.438441		513.838	1.25553	0.513859		618.789	1.81961	0.913035		402.487	2.0242	0.37434						602.343	1.40717	1.13594		615.85	1.44435	1.09155
616.175	1.54414	1.26327		616.175	1.46676	1.09655		616.175	1.42729	0.84207		662.613	1.58441	0.947946		638.438	1.76705	1.3075		483.603	1.56361	0.435826		513.391	1.25713	0.508525		619.429	1.82518	0.912715		401.99	2.02391	0.37505						603.12	1.41007	1.14205		616.66	1.44802	1.09644
616.984	1.55043	1.2666		616.984	1.47143	1.10109		616.984	1.42888	0.84762		663.363	1.58987	0.948195		639.139	1.77558	1.30746		483.079	1.56111	0.433189		512.944	1.25881	0.503221		620.07	1.83061	0.912333		401.494	2.0236	0.37576						603.898	1.41315	1.1483		617.47	1.45173	1.10126
617.793	1.55669	1.26982		617.793	1.47612	1.10552		617.793	1.43058	0.85315		664.114	1.59513	0.9484		639.84	1.78388	1.3072		482.556	1.55867	0.430532		512.498	1.26056	0.497948		620.711	1.83591	0.911901		401	2.02328	0.37645						604.675	1.41644	1.1547		618.28	1.4555	1.10601
618.602	1.56291	1.27293		618.602	1.48085	1.10984		618.602	1.43238	0.85868		664.865	1.60019	0.948581		640.541	1.79194	1.30673		482.034	1.55628	0.427854		512.054	1.26237	0.492707		621.351	1.84107	0.911434		400.506	2.02294	0.37713						605.453	1.41996	1.16121		619.09	1.45929	1.11068
619.411	1.56909	1.27594		619.411	1.4856	1.11405		619.411	1.4343	0.8642		665.616	1.60506	0.948756		641.241	1.79974	1.30609		481.513	1.55396	0.425159		511.609	1.26426	0.487501		621.992	1.84611	0.910942		400.014	2.02259	0.3778						606.23	1.42371	1.16782		619.9	1.46313	1.11527
620.22	1.57523	1.27884		620.22	1.49037	1.11815		620.22	1.43633	0.8697		666.366	1.60974	0.948945		641.942	1.80728	1.3053		480.993	1.55169	0.422446		511.166	1.26621	0.48233		622.633	1.85101	0.910438		399.523	2.02223	0.37845						607.008	1.42772	1.17452		620.71	1.467	1.11979
621.029	1.58132	1.28165		621.029	1.49515	1.12215		621.029	1.43846	0.87518		667.117	1.61424	0.949167		642.643	1.81453	1.30439		480.475	1.54948	0.419718		510.724	1.26824	0.477196		623.273	1.85579	0.909934		399.034	2.02185	0.3791						607.785	1.43198	1.18128		621.52	1.4709	1.12424
621.838	1.58736	1.28437		621.838	1.49994	1.12604		621.838	1.44071	0.88063		667.868	1.61856	0.949438		643.343	1.82151	1.30338		479.957	1.54733	0.416975		510.282	1.27033	0.472101		623.914	1.86046	0.909439		398.545	2.02147	0.37973						608.563	1.43651	1.18808		622.33	1.47483	1.12861
622.647	1.59334	1.28699		622.647	1.50473	1.12982		622.647	1.44307	0.88605		668.619	1.62271	0.949777		644.044	1.82821	1.30231		479.441	1.54523	0.414219		509.841	1.27249	0.467045		624.555	1.86501	0.908963		398.058	2.02107	0.38035						609.34	1.44131	1.1949		623.14	1.47879	1.13291
623.456	1.59927	1.28954		623.456	1.50952	1.13351		623.456	1.44553	0.89143		669.369	1.6267	0.950198		644.745	1.83462	1.3012		478.926	1.54319	0.411452		509.4	1.27471	0.462031		625.195	1.86945	0.908516		397.572	2.02066	0.38095						610.118	1.44639	1.20172		623.95	1.48276	1.13713
624.265	1.60514	1.292		624.265	1.51431	1.1371		624.265	1.4481	0.89677		670.12	1.63054	0.950717		645.445	1.84076	1.30007		478.411	1.54121	0.408673		508.961	1.277	0.45706		625.836	1.87379	0.908106		397.087	2.02024	0.38154						610.895	1.45173	1.20852		624.76	1.48676	1.14128
625.074	1.61095	1.29439		625.074	1.51909	1.14058		625.074	1.45078	0.90207		670.871	1.63424	0.951346		646.146	1.84663	1.29896		477.898	1.53929	0.405885		508.522	1.27935	0.452133		626.476	1.87803	0.907739		396.603	2.01981	0.38212						611.673	1.45735	1.21528		625.57	1.49077	1.14536
625.883	1.61669	1.29672		625.883	1.52385	1.14398		625.883	1.45356	0.90732		671.622	1.63782	0.952098		646.847	1.85224	1.29788		477.386	1.53742	0.403088		508.084	1.28177	0.447251		627.117	1.88219	0.907423		396.121	2.01937	0.38268						612.45	1.46324	1.22199		626.38	1.49479	1.14936
626.692	1.62237	1.29897		626.692	1.5286	1.14728		626.692	1.45644	0.91251		672.372	1.64129	0.952983		647.548	1.85759	1.29686		476.875	1.53561	0.400284		507.647	1.28425	0.442416		627.758	1.88627	0.907164		395.639	2.01892	0.38323						613.228	1.46939	1.22861		627.19	1.49883	1.1533
627.501	1.62797	1.30117		627.501	1.53332	1.1505		627.501	1.45942	0.91764		673.123	1.64467	0.954012		648.248	1.8627	1.29591		476.366	1.53385	0.397474		507.21	1.2868	0.437629		628.398	1.89028	0.906966		395.159	2.01846	0.38376						614.005	1.4758	1.23514		628	1.50287	1.15716
628.31	1.63351	1.30332		628.31	1.53802	1.15363		628.31	1.4625	0.92271		673.874	1.64796	0.955191		648.949	1.86759	1.29506		475.857	1.53215	0.394659		506.775	1.2894	0.432891		629.039	1.89423	0.906833		394.68	2.018	0.38428						614.783	1.48245	1.24156		628.81	1.50692	1.16096
629.119	1.63899	1.30542		629.119	1.5427	1.15668		629.119	1.46567	0.92771		674.625	1.65119	0.956529		649.65	1.87226	1.29432		475.349	1.53051	0.39184		506.34	1.29207	0.428204		629.68	1.89812	0.90677		394.202	2.01753	0.38478						615.561	1.48934	1.24785		629.62	1.51098	1.16469
629.928	1.64439	1.30747		629.928	1.54734	1.15965		629.928	1.46894	0.93263		675.375	1.65437	0.958029		650.35	1.87673	1.29371		474.843	1.52892	0.389018		505.905	1.29479	0.423569		630.32	1.90197	0.906779		393.725	2.01706	0.38527						616.338	1.49645	1.25401		630.43	1.51503	1.16836
630.737	1.64972	1.30948		630.737	1.55195	1.16254		630.737	1.47229	0.93748		676.126	1.65751	0.959697		651.051	1.88101	1.29324		474.337	1.52738	0.386195		505.472	1.29757	0.418987		630.961	1.90577	0.906862		393.25	2.01657	0.38575						617.116	1.50379	1.26002		631.24	1.51908	1.17196
631.546	1.65498	1.31147		631.546	1.55652	1.16537		631.546	1.47572	0.94225		676.877	1.66063	0.961535		651.752	1.88513	1.29293		473.833	1.5259	0.383371		505.039	1.30041	0.414459		631.602	1.90955	0.907022		392.775	2.01609	0.38621						617.893	1.51133	1.26587		632.05	1.52313	1.1755
632.355	1.66017	1.31342		632.355	1.56106	1.16812		632.355	1.47924	0.94693		677.628	1.66375	0.963546		652.452	1.8891	1.29278		473.329	1.52447	0.380547		504.607	1.3033	0.409986		632.242	1.9133	0.90726		392.302	2.0156	0.38665						618.671	1.51908	1.27156		632.86	1.52718	1.17897
633.164	1.66529	1.31535		633.164	1.56555	1.17082		633.164	1.48283	0.95152		678.378	1.66688	0.965729		653.153	1.89293	1.29279		472.827	1.5231	0.377725		504.176	1.30625	0.405569		632.883	1.91704	0.907575		391.83	2.0151	0.38708						619.448	1.52701	1.27707		633.67	1.53121	1.18239
633.973	1.67034	1.31727		633.973	1.57001	1.17345		633.973	1.48649	0.95602		679.129	1.67003	0.968085		653.854	1.89665	1.29299		472.326	1.52177	0.374904		503.745	1.30925	0.401209		633.524	1.92077	0.907969		391.359	2.0146	0.38749						620.226	1.53512	1.2824		634.48	1.53524	1.18575
634.782	1.67532	1.31917		634.782	1.57442	1.17603		634.782	1.49021	0.96043		679.88	1.67323	0.970611		654.555	1.90026	1.29337		471.826	1.5205	0.372088		503.315	1.3123	0.396908		634.164	1.92449	0.908441		390.889	2.0141	0.38789						621.003	1.5434	1.28754		635.29	1.53925	1.18905
635.591	1.68024	1.32107		635.591	1.57879	1.17856		635.591	1.49399	0.96474		680.631	1.67648	0.973306		655.255	1.90378	1.29394		471.327	1.51928	0.369275		502.886	1.3154	0.392665		634.805	1.92822	0.908991		390.42	2.01359	0.38827						621.781	1.55184	1.29249		636.1	1.54325	1.19229
636.4	1.68509	1.32296		636.4	1.58311	1.18104		636.4	1.49783	0.96894		681.381	1.67979	0.976167		655.956	1.90724	1.2947		470.829	1.51812	0.366467		502.458	1.31856	0.388483		635.445	1.93196	0.909618		389.952	2.01309	0.38864						622.558	1.56043	1.29723		636.91	1.54724	1.19549
637.209	1.68988	1.32485		637.209	1.58738	1.18347		637.209	1.50171	0.97305		682.132	1.68319	0.979189		656.657	1.91063	1.29566		470.332	1.517	0.363665		502.03	1.32176	0.384361		636.086	1.93572	0.910321		389.486	2.01258	0.38899						623.336	1.56916	1.30177		637.72	1.55121	1.19863
638.018	1.69461	1.32675		638.018	1.59161	1.18587		638.018	1.50564	0.97705		682.883	1.68667	0.982369		657.357	1.91399	1.29681		469.836	1.51593	0.36087		501.603	1.325	0.380302		636.727	1.9395	0.911098		389.021	2.01207	0.38932						624.113	1.57803	1.3061		638.53	1.55516	1.20173
638.827	1.69928	1.32867		638.827	1.59579	1.18823		638.827	1.50961	0.98094		683.634	1.69027	0.9857		658.058	1.91731	1.29815		469.341	1.51491	0.358083		501.177	1.3283	0.376304		637.367	1.94332	0.911947		388.556	2.01156	0.38965						624.891	1.58702	1.31021		639.34	1.55909	1.20478
639.636	1.70389	1.33059		639.636	1.59993	1.19055		639.636	1.5136	0.98473		684.384	1.69398	0.989177		658.759	1.92063	1.2997		468.847	1.51394	0.355304		500.752	1.33163	0.37237		638.008	1.94716	0.912868		388.093	2.01105	0.38995						625.668	1.59613	1.3141		640.15	1.563	1.20778
640.445	1.70846	1.33254		640.445	1.60402	1.19285		640.445	1.51762	0.98842		685.135	1.69781	0.992793		659.459	1.92394	1.30143		468.354	1.51302	0.352534		500.327	1.33501	0.3685		638.649	1.95105	0.913858		387.631	2.01054	0.39024						626.446	1.60535	1.31777		640.96	1.56689	1.21075
641.254	1.71297	1.33451		641.254	1.60806	1.19512		641.254	1.52166	0.99199		685.886	1.70179	0.996542		660.16	1.92726	1.30336		467.863	1.51215	0.349775		499.903	1.33843	0.364693		639.289	1.95499	0.914914		387.17	2.01003	0.39052						627.223	1.61467	1.3212		641.77	1.57076	1.21367
642.063	1.71744	1.33651		642.063	1.61205	1.19737		642.063	1.52571	0.99546		686.637	1.70591	1.00042		660.861	1.93061	1.30549		467.372	1.51132	0.347026		499.48	1.34189	0.360952		639.93	1.95898	0.916034		386.71	2.00953	0.39078						628.001	1.62409	1.3244		642.58	1.5746	1.21655
642.872	1.72186	1.33853		642.872	1.616	1.1996		642.872	1.52976	0.99883		687.387	1.71019	1.00441		661.562	1.93399	1.3078		466.882	1.51054	0.344288		499.057	1.34539	0.357277		640.571	1.96302	0.917216		386.251	2.00902	0.39102						628.778	1.63359	1.32736		643.39	1.57842	1.2194
643.681	1.72625	1.34059		643.681	1.61991	1.20182		643.681	1.53381	1.00209		688.138	1.71463	1.00851		662.262	1.93741	1.31029		466.394	1.50981	0.341563		498.635	1.34892	0.353668		641.211	1.96712	0.918457		385.794	2.00852	0.39125						629.556	1.64318	1.33007		644.2	1.58221	1.22222
644.49	1.73061	1.34269		644.49	1.62377	1.20402		644.49	1.53786	1.00524		688.889	1.71925	1.01271		662.963	1.9409	1.31297		465.906	1.50912	0.33885		498.214	1.35249	0.350125		641.852	1.97129	0.919754		385.337	2.00802	0.39147						630.333	1.65283	1.33252		645.01	1.58597	1.225
645.299	1.73493	1.34482		645.299	1.62758	1.20622		645.299	1.5419	1.0083		689.64	1.72405	1.01701		663.664	1.94445	1.31583		465.419	1.50847	0.336151		497.794	1.35609	0.346649		642.492	1.97553	0.921105		384.881	2.00752	0.39167						631.111	1.66255	1.33472		645.82	1.58971	1.22776
646.108	1.73923	1.347		646.108	1.63136	1.20841		646.108	1.54591	1.01126		690.39	1.72904	1.02139		664.364	1.94807	1.31887		464.934	1.50787	0.333466		497.374	1.35973	0.34324		643.133	1.97984	0.922505		384.427	2.00703	0.39185						631.888	1.67232	1.33664		646.63	1.59342	1.23048
646.917	1.7435	1.34922		646.917	1.6351	1.2106		646.917	1.54991	1.01413		691.141	1.73423	1.02584		665.065	1.95178	1.32208		464.449	1.50731	0.330795		496.955	1.36339	0.339898		643.774	1.98423	0.923954		383.974	2.00654	0.39202						632.666	1.68213	1.33829		647.44	1.59711	1.23319
647.726	1.74776	1.35148		647.726	1.63879	1.21279		647.726	1.55387	1.01691		691.892	1.73962	1.03036		665.766	1.95559	1.32545		463.965	1.5068	0.32814		496.537	1.36709	0.336625		644.414	1.9887	0.925446		383.521	2.00605	0.39218						633.443	1.69198	1.33966		648.25	1.60076	1.23587
648.535	1.75201	1.35379		648.535	1.64245	1.21498		648.535	1.5578	1.0196		692.643	1.74521	1.03494		666.466	1.9595	1.32899		463.483	1.50632	0.3255		496.119	1.37082	0.333419		645.055	1.99326	0.92698		383.07	2.00557	0.39233						634.221	1.70184	1.34073		649.06	1.60439	1.23853
649.344	1.75625	1.35615		649.344	1.64608	1.21718		649.344	1.56169	1.02221		693.393	1.75102	1.03956		667.167	1.96352	1.3327		463.001	1.50589	0.322877		495.702	1.37457	0.330282		645.696	1.9979	0.928551		382.62	2.0051	0.39245						634.998	1.71171	1.3415		649.87	1.60799	1.24117
650.153	1.76048	1.35856		650.153	1.64967	1.21938		650.153	1.56554	1.02474		694.144	1.75705	1.04422		667.868	1.96766	1.33655		462.521	1.5055	0.32027		495.286	1.37834	0.327213		646.336	2.00264	0.930156		382.171	2.00463	0.39257						635.776	1.72157	1.34197		650.68	1.61156	1.2438
650.962	1.76472	1.36102		650.962	1.65323	1.2216		650.962	1.56934	1.02719		694.895	1.7633	1.04891		668.569	1.97192	1.34056		462.041	1.50514	0.317681		494.871	1.38214	0.324213		646.977	2.00747	0.931792		381.722	2.00417	0.39267						636.554	1.73141	1.34212		651.49	1.61511	1.24641
651.771	1.76896	1.36352		651.771	1.65676	1.22383		651.771	1.57309	1.02958		695.646	1.76978	1.05361		669.269	1.97632	1.34472		461.563	1.50483	0.315109		494.456	1.38597	0.321281		647.618	2.01241	0.933455		381.275	2.00371	0.39276						637.331	1.74121	1.34194		652.3	1.61862	1.24902
652.58	1.77322	1.36608		652.58	1.66027	1.22607		652.58	1.57679	1.03191		696.396	1.77649	1.05832		669.97	1.98086	1.34902		461.085	1.50455	0.312556		494.042	1.38981	0.318417		648.258	2.01744	0.935141		380.829	2.00326	0.39284						638.109	1.75094	1.34143		653.11	1.62211	1.25161
653.389	1.77749	1.36869		653.389	1.66375	1.22832		653.389	1.58044	1.03417		697.147	1.78343	1.06303		670.671	1.98556	1.35346		460.608	1.50432	0.310022		493.628	1.39367	0.315622		648.899	2.02258	0.936847		380.384	2.00282	0.3929						638.886	1.7606	1.34059		653.92	1.62557	1.2542
654.198	1.78178	1.37135		654.198	1.6672	1.2306		654.198	1.58403	1.03639		697.898	1.79061	1.06772		671.371	1.9904	1.35803		460.133	1.50411	0.307506		493.215	1.39755	0.312896		649.54	2.02784	0.938569		379.941	2.00238	0.39295						639.664	1.77015	1.3394		654.73	1.62901	1.25678
655.007	1.7861	1.37405		655.007	1.67064	1.23289		655.007	1.58755	1.03855		698.649	1.79803	1.07239		672.072	1.99541	1.36273		459.658	1.50395	0.30501		492.803	1.40145	0.310237		650.18	2.0332	0.940303		379.498	2.00195	0.39299						640.441	1.77957	1.33786		655.54	1.63242	1.25936
655.816	1.79045	1.3768		655.816	1.67406	1.23521		655.816	1.59102	1.04068		699.399	1.80569	1.07703		672.773	2.0006	1.36756		459.184	1.50382	0.302534		492.392	1.40536	0.307647		650.821	2.03868	0.942044		379.056	2.00153	0.39301						641.219	1.78884	1.33597		656.35	1.6358	1.26194
656.625	1.79483	1.3796		656.625	1.67746	1.23754		656.625	1.59442	1.04277		700.15	1.8136	1.08162		673.473	2.00595	1.3725		458.712	1.50373	0.300077		491.981	1.40929	0.305125		651.461	2.04427	0.94379		378.615	2.00112	0.39302						641.996	1.79792	1.33372		657.16	1.63916	1.26451
657.434	1.79925	1.38244		657.434	1.68085	1.2399		657.434	1.59777	1.04483		700.901	1.82175	1.08615		674.174	2.01149	1.37757		458.24	1.50367	0.297642		491.571	1.41323	0.302671		652.102	2.04999	0.945534		378.175	2.00072	0.39303						642.774	1.80678	1.33113		657.97	1.64249	1.2671
658.243	1.80372	1.38533		658.243	1.68422	1.24229		658.243	1.60105	1.04687		701.652	1.83014	1.09062		674.875	2.01722	1.38274		457.769	1.50364	0.295227		491.162	1.41718	0.300284		652.743	2.05583	0.947274		377.736	2.00032	0.39301						643.551	1.81539	1.32818		658.78	1.64581	1.26968
659.052	1.80823	1.38825		659.052	1.68759	1.24469		659.052	1.60427	1.04889		702.402	1.83878	1.09501		675.576	2.02315	1.38802		457.299	1.50365	0.292833		490.754	1.42114	0.297965		653.383	2.06179	0.949004		377.299	1.99994	0.39299						644.329	1.82372	1.32488		659.59	1.6491	1.27228
659.861	1.8128	1.39121		659.861	1.69095	1.24713		659.861	1.60742	1.05089		703.153	1.84767	1.09931		676.276	2.02928	1.3934		456.831	1.50369	0.290461		490.346	1.42511	0.295712		654.024	2.06789	0.95072		376.862	1.99956	0.39296						645.106	1.83173	1.32126		660.4	1.65237	1.27488
660.67	1.81742	1.39421		660.67	1.69431	1.24959		660.67	1.61052	1.05288		703.904	1.85681	1.10352		676.977	2.03562	1.39887		456.363	1.50376	0.28811		489.938	1.42909	0.293527		654.665	2.07411	0.952417		376.426	1.9992	0.39291						645.884	1.83939	1.31731		661.21	1.65562	1.27749
661.479	1.8221	1.39724		661.479	1.69767	1.25207		661.479	1.61356	1.05487		704.655	1.86619	1.10761		677.678	2.04218	1.40444		455.896	1.50386	0.285781		489.532	1.43307	0.291407		655.305	2.08047	0.954091		375.991	1.99884	0.39286						646.661	1.84664	1.31306		662.02	1.65885	1.28012
662.288	1.82684	1.40029		662.288	1.70103	1.25459		662.288	1.61655	1.05686		705.405	1.87582	1.11158		678.378	2.04896	1.41009		455.43	1.50399	0.283475		489.126	1.43706	0.289353		655.946	2.08696	0.955735		375.558	1.9985	0.39279						647.439	1.85346	1.30854		662.83	1.66206	1.28276
663.097	1.83165	1.40337		663.097	1.70439	1.25713		663.097	1.61947	1.05886		706.156	1.88569	1.11543		679.079	2.05596	1.41581		454.965	1.50415	0.281191		488.721	1.44106	0.287365		656.587	2.09359	0.957346		375.125	1.99817	0.39272						648.216	1.8598	1.30376		663.64	1.66526	1.28541
663.906	1.83652	1.40647		663.906	1.70775	1.25969		663.906	1.62235	1.06086		706.907	1.89581	1.11913		679.78	2.06321	1.42162		454.501	1.50435	0.278929		488.316	1.44505	0.285442		657.227	2.10036	0.958917		374.693	1.99784	0.39263						648.994	1.86563	1.29877		664.45	1.66845	1.28809
664.715	1.84147	1.40959		664.715	1.71113	1.26229		664.715	1.62518	1.06288		707.658	1.90616	1.12267		680.48	2.0707	1.42749		454.038	1.50457	0.27669		487.912	1.44905	0.283583		657.868	2.10727	0.960443		374.262	1.99753	0.39254						649.771	1.87091	1.2936		665.26	1.67162	1.29078
665.524	1.8465	1.41272		665.524	1.71451	1.26491		665.524	1.62796	1.06491		708.408	1.91675	1.12605		681.181	2.07843	1.43342		453.575	1.50482	0.274474		487.509	1.45305	0.281788		658.509	2.11433	0.961918		373.833	1.99723	0.39243						650.549	1.87561	1.2883		666.07	1.67478	1.29349
666.333	1.8516	1.41586		666.333	1.71791	1.26755		666.333	1.6307	1.06697		709.159	1.92758	1.12926		681.882	2.08643	1.43941		453.114	1.50509	0.272282		487.106	1.45704	0.280056		659.149	2.12153	0.963337		373.404	1.99694	0.39232						651.326	1.87969	1.28292		666.88	1.67793	1.29622
667.142	1.85678	1.419		667.142	1.72132	1.27023		667.142	1.63339	1.06904		709.91	1.93864	1.13227		682.583	2.09469	1.44544		452.654	1.5054	0.270112		486.704	1.46104	0.278387		659.79	2.12887	0.964693		372.976	1.99666	0.39219						652.104	1.88314	1.27752		667.69	1.68108	1.29897
667.951	1.86204	1.42215		667.951	1.72475	1.27293		667.951	1.63605	1.07115		710.661	1.94992	1.13509		683.283	2.10321	1.45152		452.195	1.50572	0.267966		486.303	1.46503	0.276781		660.43	2.13637	0.965981		372.549	1.9964	0.39206						652.881	1.88593	1.27215		668.5	1.68421	1.30175
668.76	1.86738	1.42528		668.76	1.72819	1.27565		668.76	1.63867	1.07328		711.411	1.96143	1.1377		683.984	2.11202	1.45763		451.736	1.50608	0.265844		485.903	1.46902	0.275236		661.071	2.14401	0.967193		372.123	1.99615	0.39192						653.659	1.88804	1.2669		669.31	1.68735	1.30455
669.569	1.8728	1.42841		669.569	1.73166	1.2784		669.569	1.64127	1.07544		712.162	1.97315	1.14009		684.685	2.12111	1.46377		451.279	1.50646	0.263745		485.503	1.473	0.273752		661.712	2.1518	0.968324		371.699	1.99591	0.39177						654.436	1.88947	1.26182		670.12	1.69048	1.30737
670.378	1.87831	1.43152		670.378	1.73515	1.28117		670.378	1.64383	1.07764		712.913	1.98509	1.14224		685.385	2.13049	1.46993		450.822	1.50686	0.26167		485.103	1.47698	0.272328		662.352	2.15974	0.969366		371.275	1.99568	0.39162						655.214	1.89023	1.25698		670.93	1.69361	1.31023
671.187	1.8839	1.43462		671.187	1.73867	1.28397		671.187	1.64638	1.07987		713.664	1.99723	1.14415		686.086	2.14017	1.4761		450.366	1.50729	0.259619		484.705	1.48096	0.270964		662.993	2.16783	0.970313		370.852	1.99547	0.39145						655.991	1.89033	1.25248		671.74	1.69674	1.31311
671.996	1.88958	1.43769		671.996	1.74221	1.28679		671.996	1.6489	1.08213		714.414	2.00958	1.14581		686.787	2.15015	1.48227		449.912	1.50774	0.257592		484.307	1.48492	0.269659		663.634	2.17608	0.971157		370.43	1.99527	0.39128						656.769	1.88977	1.24837		672.55	1.69987	1.31602
672.805	1.89534	1.44073		672.805	1.74578	1.28962		672.805	1.6514	1.08443		715.165	2.02211	1.14721		687.487	2.16045	1.48844		449.458	1.50822	0.255589		483.91	1.48888	0.268412		664.274	2.18447	0.971891		370.009	1.99508	0.3911						657.547	1.88861	1.24473		673.36	1.70302	1.31895
673.614	1.90118	1.44373		673.614	1.74938	1.29248		673.614	1.6539	1.08677		715.916	2.03483	1.14832		688.188	2.17107	1.49459		449.005	1.50872	0.25361		483.513	1.49282	0.267222		664.915	2.19302	0.972507		369.589	1.9949	0.39092						658.324	1.88687	1.24165		674.17	1.70616	1.32192
674.423	1.90711	1.4467		674.423	1.75302	1.29536		674.423	1.65638	1.08915		716.667	2.04773	1.14916		688.889	2.18201	1.50071		448.553	1.50924	0.251655		483.117	1.49676	0.266089		665.556	2.20172	0.972999		369.17	1.99474	0.39072						659.102	1.8846	1.23917		674.98	1.70932	1.32492
675.232	1.91312	1.44962		675.232	1.75668	1.29825		675.232	1.65886	1.09157		717.417	2.0608	1.14969		689.59	2.19329	1.5068		448.102	1.50978	0.249725		482.722	1.50068	0.265013		666.196	2.21057	0.973357		368.752	1.9946	0.39053						659.879	1.88187	1.23736		675.79	1.71249	1.32794
676.041	1.9192	1.45249		676.041	1.76038	1.30116		676.041	1.66133	1.09402		718.168	2.07403	1.14993		690.29	2.20491	1.51284		447.652	1.51034	0.247819		482.327	1.5046	0.263991		666.837	2.21957	0.973574		368.334	1.99446	0.39032						660.657	1.87874	1.23629		676.6	1.71567	1.331
676.85	1.92537	1.45531		676.85	1.76412	1.30408		676.85	1.6638	1.09651		718.919	2.0874	1.14984		690.991	2.21688	1.51882		447.203	1.51092	0.245937		481.933	1.5085	0.263024		667.477	2.22871	0.973642		367.918	1.99434	0.39011						661.434	1.87528	1.23599		677.41	1.71887	1.33409
677.659	1.93161	1.45806		677.659	1.7679	1.30702		677.659	1.66628	1.09905		719.67	2.10092	1.14943		691.692	2.2292	1.52473		446.754	1.51152	0.24408		481.539	1.51239	0.26211		668.118	2.238	0.973551		367.503	1.99424	0.3899						662.212	1.87157	1.23649		678.22	1.72209	1.3372
678.468	1.93792	1.46076		678.468	1.77171	1.30997		678.468	1.66877	1.10162		720.42	2.11456	1.14869		692.392	2.24189	1.53056		446.307	1.51214	0.242246		481.147	1.51626	0.261249		668.759	2.24744	0.973295		367.088	1.99415	0.38968						662.989	1.86768	1.23784		679.03	1.72533	1.34035
679.277	1.94431	1.46339		679.277	1.77557	1.31293		679.277	1.67126	1.10422		721.171	2.12832	1.1476		693.093	2.25494	1.53629		445.86	1.51278	0.240438		480.754	1.52012	0.26044		669.399	2.25701	0.972864		366.675	1.99407	0.38946						663.767	1.86372	1.24004		679.84	1.72859	1.34353
680.086	1.95076	1.46595		680.086	1.77947	1.31589		680.086	1.67377	1.10687		721.922	2.14219	1.14616		693.794	2.26836	1.54191		445.414	1.51344	0.238653		480.363	1.52397	0.259682		670.04	2.26673	0.972249		366.262	1.99401	0.38923						664.544	1.85975	1.2431		680.65	1.73188	1.34674
680.895	1.95727	1.46843		680.895	1.78341	1.31887		680.895	1.67629	1.10954		722.673	2.15614	1.14437		694.494	2.28217	1.5474		444.97	1.51411	0.236894		479.972	1.5278	0.258974		670.681	2.27657	0.971441		365.851	1.99396	0.38899						665.322	1.85586	1.24701		681.46	1.7352	1.34998
681.704	1.96385	1.47083		681.704	1.78739	1.32184		681.704	1.67882	1.11226		723.423	2.17018	1.14221		695.195	2.29637	1.55275		444.526	1.51481	0.235158		479.582	1.53161	0.258315		671.321	2.28655	0.970432		365.44	1.99393	0.38876						666.099	1.85214	1.25177		682.27	1.73854	1.35325
682.513	1.97048	1.47315		682.513	1.79142	1.32482		682.513	1.68138	1.11501		724.174	2.18428	1.13967		695.896	2.31095	1.55794		444.083	1.51552	0.233447		479.192	1.53541	0.257705		671.962	2.29666	0.969212		365.03	1.99391	0.38852						666.877	1.84865	1.25735		683.08	1.74192	1.35654
683.322	1.97716	1.47538		683.322	1.79549	1.32781		683.322	1.68396	1.11779		724.925	2.19844	1.13676		696.597	2.32594	1.56296		443.641	1.51624	0.23176		478.803	1.53919	0.257143		672.603	2.30688	0.967773		364.622	1.99391	0.38827						667.654	1.84548	1.26372		683.89	1.74533	1.35987
684.131	1.98389	1.47752		684.131	1.79961	1.33079		684.131	1.68657	1.1206		725.676	2.21263	1.13346		697.297	2.34132	1.56778		443.199	1.51699	0.230098		478.415	1.54295	0.256627		673.243	2.31722	0.966105		364.214	1.99393	0.38803						668.432	1.84268	1.27084		684.7	1.74878	1.36322
684.94	1.99067	1.47957		684.94	1.80377	1.33377		684.94	1.6892	1.12343		726.426	2.22684	1.12977		697.998	2.35711	1.5724		442.759	1.51774	0.22846		478.027	1.5467	0.256157		673.884	2.32767	0.9642		363.807	1.99395	0.38778						669.209	1.84033	1.27868		685.51	1.75226	1.3666
685.749	1.99748	1.48153		685.749	1.80798	1.33674		685.749	1.69186	1.1263		727.177	2.24106	1.12569		698.699	2.37331	1.57678		442.32	1.51852	0.226846		477.64	1.55043	0.255733		674.525	2.33822	0.962048		363.401	1.994	0.38752						669.987	1.83846	1.28717		686.32	1.75579	1.37
686.558	2.00432	1.48339		686.558	1.81224	1.33971		686.558	1.69455	1.1292		727.928	2.25527	1.12121		699.399	2.38992	1.5809		441.881	1.51931	0.225257		477.254	1.55413	0.255352		675.165	2.34887	0.959641		362.995	1.99406	0.38727						670.764	1.83713	1.29628		687.13	1.75936	1.37342
687.367	2.01119	1.48515		687.367	1.81654	1.34267		687.367	1.69727	1.13211		728.679	2.26945	1.11634		700.1	2.40695	1.58476		441.443	1.52011	0.223692		476.868	1.55782	0.255014		675.806	2.35961	0.95697		362.591	1.99413	0.38701						671.542	1.83637	1.30595		687.94	1.76297	1.37687
688.176	2.01809	1.48681		688.176	1.8209	1.34562		688.176	1.70002	1.13505		729.429	2.28359	1.11106		700.801	2.42439	1.58832		441.006	1.52093	0.222151		476.483	1.5615	0.254719		676.446	2.37042	0.954027		362.188	1.99422	0.38676						672.319	1.83621	1.31612		688.75	1.76663	1.38034
688.985	2.025	1.48838		688.985	1.82529	1.34856		688.985	1.70281	1.13802		730.18	2.29768	1.10537		701.502	2.44225	1.59156		440.57	1.52176	0.220634		476.098	1.56515	0.254465		677.087	2.38131	0.950802		361.785	1.99433	0.3865						673.097	1.83669	1.32674		689.56	1.77034	1.38383
689.794	2.03192	1.48984		689.794	1.82974	1.35148		689.794	1.70564	1.141		730.931	2.31168	1.09929		702.202	2.46052	1.59445		440.135	1.5226	0.219142		475.714	1.56878	0.254251		677.728	2.39225	0.94729		361.384	1.99445	0.38624						673.874	1.83781	1.33776		690.37	1.77411	1.38733
690.603	2.03884	1.49119		690.603	1.83423	1.35439		690.603	1.7085	1.144		731.682	2.3256	1.0928		702.903	2.4792	1.59698		439.701	1.52346	0.217673		475.331	1.57239	0.254078		678.368	2.40324	0.94348		360.983	1.99459	0.38598						674.652	1.83959	1.34913		691.18	1.77792	1.39085
691.412	2.04577	1.49245		691.412	1.83877	1.35728		691.412	1.7114	1.14701		732.432	2.33941	1.08592		703.604	2.49829	1.59911		439.267	1.52432	0.216229		474.948	1.57599	0.253943		679.009	2.41428	0.939367		360.583	1.99474	0.38572						675.429	1.84203	1.3608		691.99	1.78179	1.39439
692.221	2.05269	1.4936		692.221	1.84336	1.36016		692.221	1.71434	1.15004		733.183	2.35309	1.07863		704.304	2.51779	1.60082		438.835	1.52521	0.214808		474.566	1.57956	0.253846		679.65	2.42534	0.934944		360.184	1.99491	0.38545						676.207	1.84515	1.37272		692.8	1.78571	1.39793
693.03	2.05959	1.49466		693.03	1.84799	1.36301		693.03	1.71731	1.15308		733.934	2.36662	1.07095		705.005	2.53768	1.60209		438.403	1.5261	0.213412		474.185	1.58312	0.253786		680.29	2.43641	0.930204		359.786	1.99509	0.38519						676.984	1.84894	1.38484		693.61	1.7897	1.40148
693.839	2.06648	1.49561		693.839	1.85267	1.36583		693.839	1.72033	1.15613		734.685	2.38	1.06288		705.706	2.55797	1.60288		437.972	1.527	0.212039		473.804	1.58665	0.253762		680.931	2.44749	0.925141		359.389	1.9953	0.38493						677.762	1.85339	1.39714		694.42	1.79374	1.40505
694.648	2.07334	1.49646		694.648	1.85739	1.36864		694.648	1.72339	1.15919		735.435	2.3932	1.05443		706.406	2.57863	1.60316		437.542	1.52792	0.21069		473.424	1.59017	0.253774		681.572	2.45855	0.91975		358.993	1.99551	0.38467						678.539	1.8585	1.40956		695.23	1.79784	1.40861
695.457	2.08018	1.49722		695.457	1.86216	1.37141		695.457	1.72649	1.16226		736.186	2.40621	1.0456		707.107	2.59967	1.60291		437.113	1.52884	0.209365		473.044	1.59366	0.25382		682.212	2.46959	0.914026		358.597	1.99575	0.38441						679.317	1.86427	1.42208		696.04	1.802	1.41218
696.266	2.08698	1.49789		696.266	1.86697	1.37416		696.266	1.72963	1.16533		736.937	2.41901	1.0364		707.808	2.62106	1.6021		436.684	1.52978	0.208064		472.665	1.59714	0.2539		682.853	2.48058	0.907966		358.203	1.99599	0.38416						680.095	1.87068	1.43466		696.85	1.80623	1.41574
697.075	2.09373	1.49847		697.075	1.87182	1.37688		697.075	1.73281	1.1684		737.688	2.43158	1.02683		708.509	2.64279	1.6007		436.257	1.53073	0.206786		472.286	1.6006	0.254013		683.493	2.49153	0.901566		357.809	1.99626	0.3839						680.872	1.87773	1.44727		697.66	1.81052	1.41931
697.884	2.10044	1.49895		697.884	1.87671	1.37956		697.884	1.73604	1.17148		738.438	2.44391	1.01692		709.209	2.66484	1.59867		435.83	1.53168	0.205531		471.909	1.60403	0.254159		684.134	2.50239	0.894825		357.416	1.99654	0.38365						681.65	1.8854	1.4599		698.47	1.81488	1.42286
698.693	2.1071	1.49936		698.693	1.88164	1.38221		698.693	1.73931	1.17455		739.189	2.45599	1.00665		709.91	2.6872	1.59599		435.404	1.53265	0.204301		471.531	1.60745	0.254336		684.775	2.51318	0.88774		357.024	1.99684	0.38339						682.427	1.89368	1.47251		699.28	1.8193	1.42641
699.502	2.1137	1.49968		699.502	1.88662	1.38483		699.502	1.74262	1.17763		739.94	2.46779	0.996058		710.611	2.70983	1.59263		434.979	1.53362	0.203093		471.155	1.61086	0.254543		685.415	2.52386	0.880311		356.633	1.99715	0.38315						683.205	1.90256	1.48508		700.09	1.82378	1.42994
700.311	2.12024	1.49993		700.311	1.89162	1.38741		700.311	1.74597	1.1807		740.691	2.47932	0.985142		711.311	2.73271	1.58856		434.555	1.5346	0.201909		470.779	1.61424	0.254781		686.056	2.53442	0.872539		356.243	1.99748	0.3829						683.982	1.91203	1.4976		700.9	1.82833	1.43346
701.12	2.12672	1.5001		701.12	1.89667	1.38995		701.12	1.74936	1.18376		741.441	2.49054	0.973915		712.012	2.75582	1.58374		434.132	1.53559	0.200749		470.403	1.6176	0.255048		686.697	2.54484	0.864426		355.854	1.99783	0.38265						684.76	1.92209	1.51005		701.71	1.83295	1.43695
701.929	2.13312	1.50021		701.929	1.90175	1.39246		701.929	1.75279	1.18682		742.192	2.50146	0.962392		712.713	2.77913	1.57816		433.709	1.53659	0.199611		470.028	1.62095	0.255345		687.337	2.55511	0.855973		355.465	1.99819	0.38241						685.537	1.93272	1.52241		702.52	1.83763	1.44043
702.738	2.13945	1.50026		702.738	1.90686	1.39492		702.738	1.75627	1.18988		742.943	2.51206	0.950586		713.413	2.80259	1.57179		433.287	1.5376	0.198497		469.654	1.62428	0.255669		687.978	2.5652	0.847184		355.077	1.99857	0.38218						686.315	1.94391	1.53467		703.33	1.84238	1.44388
703.547	2.1457	1.50026		703.547	1.912	1.39735		703.547	1.75978	1.19292		743.694	2.52233	0.93851		714.114	2.82618	1.5646		432.866	1.53862	0.197406		469.281	1.6276	0.256021		688.619	2.57511	0.838064		354.69	1.99896	0.38194						687.092	1.95566	1.54681		704.14	1.84719	1.4473
704.356	2.15187	1.5002		704.356	1.91717	1.39973		704.356	1.76334	1.19595		744.444	2.53226	0.92618		714.815	2.84985	1.55656		432.446	1.53964	0.196338		468.908	1.6309	0.256401		689.259	2.58482	0.82862		354.304	1.99937	0.38172						687.87	1.96797	1.55883		704.95	1.85206	1.45069
705.165	2.15795	1.5001		705.165	1.92237	1.40206		705.165	1.76694	1.19897		745.195	2.54183	0.913611		715.516	2.87357	1.54766		432.027	1.54067	0.195292		468.535	1.63418	0.256806		689.9	2.5943	0.818856		353.919	1.9998	0.38149						688.647	1.98082	1.57071		705.76	1.857	1.45405
705.974	2.16395	1.49996		705.974	1.9276	1.40436		705.974	1.77057	1.20197		745.946	2.55105	0.900818		716.216	2.89729	1.53789		431.609	1.5417	0.19427		468.163	1.63745	0.257239		690.541	2.60355	0.808783		353.535	2.00024	0.38127						689.425	1.99421	1.58244		706.57	1.862	1.45736
706.783	2.16985	1.4998		706.783	1.93285	1.40661		706.783	1.77424	1.20496		746.697	2.55991	0.887816		716.917	2.92095	1.52721		431.191	1.54274	0.19327		467.792	1.64071	0.257697		691.181	2.61254	0.798408		353.151	2.0007	0.38106						690.202	2.00815	1.59402		707.38	1.86705	1.46064
707.592	2.17567	1.49961		707.592	1.93812	1.40881		707.592	1.77796	1.20793		747.447	2.56839	0.874622		717.618	2.94452	1.51562		430.774	1.54379	0.192294		467.421	1.64395	0.25818		691.822	2.62126	0.787742		352.769	2.00117	0.38085						690.98	2.02262	1.60542		708.19	1.87217	1.46386
708.401	2.18139	1.4994		708.401	1.94341	1.41097		708.401	1.7817	1.21089		748.198	2.5765	0.861252		718.318	2.96794	1.50311		430.358	1.54485	0.191339		467.051	1.64718	0.258689		692.462	2.6297	0.776797		352.387	2.00166	0.38064						691.757	2.03763	1.61665		709	1.87734	1.46704
709.21	2.18701	1.49918		709.21	1.94872	1.41308		709.21	1.78549	1.21383		748.949	2.58422	0.847722		719.019	2.99116	1.48967		429.943	1.5459	0.190408		466.682	1.65039	0.259222		693.103	2.63784	0.765584		352.006	2.00217	0.38045						692.535	2.05317	1.62769		709.81	1.88257	1.47017
710.019	2.19254	1.49896		710.019	1.95404	1.41515		710.019	1.78931	1.21675		749.7	2.59157	0.834049		719.72	3.01412	1.47531		429.528	1.54697	0.189499		466.313	1.6536	0.259781		693.744	2.64567	0.754117		351.626	2.00269	0.38025						693.312	2.06926	1.63852		710.62	1.88784	1.47325
710.828	2.19797	1.49875		710.828	1.95938	1.41716		710.828	1.79316	1.21964		750.45	2.59852	0.820248		720.42	3.03677	1.46001		429.115	1.54804	0.188612		465.944	1.65679	0.260363		694.384	2.65317	0.74241		351.246	2.00323	0.38007						694.09	2.08589	1.64914		711.43	1.89317	1.47627
711.637	2.20331	1.49854		711.637	1.96473	1.41914		711.637	1.79705	1.22252		751.201	2.60509	0.806336		721.121	3.05905	1.4438		428.702	1.54911	0.187748		465.577	1.65997	0.260971		695.025	2.66033	0.730478		350.868	2.00378	0.37989						694.867	2.10306	1.65954		712.24	1.89853	1.47923
712.446	2.20855	1.49836		712.446	1.97009	1.42106		712.446	1.80098	1.22537		751.952	2.61126	0.79233		721.822	3.0809	1.42668		428.29	1.55019	0.186906		465.21	1.66315	0.261603		695.666	2.66715	0.718337		350.49	2.00435	0.37972						695.645	2.12077	1.66971		713.05	1.90395	1.48213
713.255	2.2137	1.49821		713.255	1.97545	1.42294		713.255	1.80493	1.2282		752.703	2.61705	0.778244		722.523	3.10227	1.40866		427.879	1.55127	0.186087		464.843	1.66631	0.262259		696.306	2.67361	0.706003		350.113	2.00494	0.37955						696.422	2.13904	1.67962		713.86	1.90939	1.48496
714.064	2.21875	1.49809		714.064	1.98082	1.42478		714.064	1.80891	1.23101		753.453	2.62245	0.764096		723.223	3.12309	1.38976		427.468	1.55236	0.185289		464.477	1.66947	0.26294		696.947	2.6797	0.693494		349.737	2.00554	0.3794						697.2	2.15787	1.68927		714.67	1.91488	1.48773
714.873	2.22372	1.49802		714.873	1.9862	1.42656		714.873	1.81293	1.23379		754.204	2.62747	0.749899		723.924	3.14332	1.37002		427.058	1.55345	0.184514		464.111	1.67262	0.263646		697.588	2.68542	0.680826		349.362	2.00616	0.37925						697.977	2.17726	1.69863		715.48	1.92039	1.49044
715.682	2.22859	1.49799		715.682	1.99157	1.42831		715.682	1.81697	1.23654		754.955	2.63209	0.735669		724.625	3.16289	1.34946		426.65	1.55455	0.183761		463.747	1.67577	0.264377		698.228	2.69075	0.668019		348.987	2.00679	0.37911						698.755	2.19722	1.7077		716.29	1.92594	1.49307
716.491	2.23338	1.49802		716.491	1.99695	1.43001		716.491	1.82104	1.23927		755.706	2.63634	0.721421		725.325	3.18177	1.32811		426.241	1.55564	0.183029		463.382	1.67891	0.265134		698.869	2.6957	0.655091		348.614	2.00744	0.37897						699.532	2.21776	1.71646		717.1	1.9315	1.49563
717.3	2.23809	1.49812		717.3	2.00232	1.43166		717.3	1.82514	1.24197		756.456	2.64022	0.707169		726.026	3.19988	1.30602		425.834	1.55674	0.18232		463.019	1.68204	0.265916		699.51	2.70026	0.64206		348.241	2.0081	0.37885						700.31	2.23888	1.72488		717.91	1.93708	1.49813
718.109	2.24272	1.4983		718.109	2.00768	1.43328		718.109	1.82926	1.24464		757.207	2.64371	0.692927		726.727	3.2172	1.28323		425.428	1.55785	0.181633		462.655	1.68517	0.266725		700.15	2.70442	0.628945		347.869	2.00878	0.37873						701.088	2.26059	1.73294		718.72	1.94268	1.50055
718.918	2.24727	1.49855		718.918	2.01304	1.43485		718.918	1.83341	1.24729		757.958	2.64685	0.678707		727.427	3.23367	1.25978		425.022	1.55895	0.180967		462.293	1.6883	0.26756		700.791	2.70819	0.615765		347.497	2.00947	0.37863						701.865	2.2829	1.74062		719.53	1.94828	1.5029
719.727	2.25175	1.49889		719.727	2.01838	1.43639		719.727	1.83758	1.24991		758.709	2.64962	0.664523		728.128	3.24926	1.23572		424.617	1.56006	0.180323		461.931	1.69143	0.268424		701.431	2.71157	0.602539		347.127	2.01018	0.37853						702.643	2.30581	1.7479		720.34	1.9539	1.50518
720.536	2.25617	1.49932		720.536	2.02372	1.43789		720.536	1.84177	1.25249		759.459	2.65203	0.650387		728.829	3.26394	1.21111		424.213	1.56117	0.179701		461.569	1.69455	0.269315		702.072	2.71454	0.589286		346.757	2.0109	0.37844						703.42	2.32933	1.75475		721.15	1.95951	1.50739
721.345	2.26053	1.49986		721.345	2.02904	1.43935		721.345	1.84599	1.25505		760.21	2.6541	0.63631		729.53	3.27766	1.18602		423.809	1.56228	0.1791		461.209	1.69767	0.270236		702.713	2.71713	0.576023		346.388	2.01164	0.37836						704.198	2.35347	1.76113		721.96	1.96511	1.50952
722.154	2.26483	1.5005		722.154	2.03435	1.44077		722.154	1.85022	1.25758		760.961	2.65582	0.622304		730.23	3.2904	1.16048		423.406	1.56339	0.178521		460.848	1.70079	0.271186		703.353	2.71932	0.562769		346.02	2.0124	0.3783						704.975	2.37823	1.76703		722.77	1.97071	1.51159
722.963	2.26909	1.50126		722.963	2.03964	1.44217		722.963	1.85447	1.26008		761.712	2.65721	0.608378		730.931	3.30216	1.13457		423.004	1.56451	0.177963		460.488	1.70391	0.272168		703.994	2.72113	0.549542		345.653	2.01317	0.37824						705.753	2.40362	1.7724		723.58	1.97629	1.5136
723.772	2.27331	1.50214		723.772	2.04491	1.44353		723.772	1.85874	1.26255		762.462	2.65827	0.594544		731.632	3.31289	1.10835		422.603	1.56562	0.177427		460.129	1.70703	0.273181		704.635	2.72255	0.536358		345.286	2.01395	0.37819						706.53	2.42964	1.77721		724.39	1.98185	1.51553
724.581	2.27749	1.50314		724.581	2.05017	1.44486		724.581	1.86302	1.26499		763.213	2.65902	0.58081		732.332	3.32261	1.08188		422.203	1.56674	0.176913		459.771	1.71016	0.274228		705.275	2.7236	0.523235		344.92	2.01475	0.37816						707.308	2.4563	1.78142		725.2	1.98739	1.51741
725.39	2.28165	1.50427		725.39	2.0554	1.44617		725.39	1.86732	1.2674		763.964	2.65945	0.567184		733.033	3.3313	1.05522		421.803	1.56785	0.176419		459.413	1.71328	0.275309		705.916	2.72428	0.510188		344.555	2.01556	0.37814						708.085	2.48358	1.785		726.01	1.9929	1.51922
726.199	2.2858	1.50554		726.199	2.06061	1.44746		726.199	1.87163	1.26978		764.715	2.65958	0.553676		733.734	3.33896	1.02843		421.404	1.56897	0.175947		459.055	1.71641	0.276426		706.557	2.72461	0.497232		344.191	2.01639	0.37812						708.863	2.51151	1.78789		726.82	1.99838	1.52098
727.008	2.28993	1.50695		727.008	2.06579	1.44872		727.008	1.87596	1.27213		765.465	2.65942	0.540293		734.434	3.34559	1.00158		421.006	1.57009	0.175496		458.698	1.71953	0.277579		707.197	2.72457	0.484383		343.827	2.01723	0.37812						709.64	2.54006	1.79006		727.63	2.00382	1.52269
727.817	2.29406	1.50851		727.817	2.07095	1.44996		727.817	1.88029	1.27445		766.216	2.65897	0.527042		735.135	3.35121	0.974727		420.609	1.57121	0.175066		458.342	1.72266	0.278772		707.838	2.7242	0.471653		343.465	2.01809	0.37813						710.418	2.56923	1.79146		728.44	2.00923	1.52434
728.626	2.2982	1.51021		728.626	2.07609	1.45119		728.626	1.88464	1.27673		766.967	2.65824	0.513929		735.836	3.35584	0.947925		420.212	1.57232	0.174657		457.986	1.7258	0.280004		708.478	2.7235	0.459056		343.103	2.01896	0.37816						711.195	2.59902	1.79203		729.25	2.01459	1.52595
729.435	2.30235	1.51207		729.435	2.0812	1.4524		729.435	1.88899	1.27899		767.718	2.65725	0.500961		736.537	3.35948	0.921232		419.816	1.57344	0.174269		457.63	1.72893	0.281277		709.119	2.72247	0.446604		342.741	2.01984	0.37819						711.973	2.62941	1.79173		730.06	2.0199	1.52752
730.244	2.30654	1.51408		730.244	2.08628	1.4536		730.244	1.89335	1.28122		768.468	2.65599	0.488142		737.237	3.36215	0.8947		419.421	1.57455	0.173902		457.276	1.73206	0.282593		709.76	2.72113	0.434308		342.381	2.02074	0.37824						712.75	2.6604	1.7905		730.87	2.02516	1.52905
731.053	2.31076	1.51625		731.053	2.09134	1.45479		731.053	1.89772	1.28343		769.219	2.65449	0.475479		737.938	3.3639	0.86838		419.027	1.57567	0.173557		456.922	1.7352	0.283955		710.4	2.71949	0.422179		342.021	2.02165	0.37831						713.528	2.69195	1.78828		731.68	2.03037	1.53055
731.862	2.31503	1.51859		731.862	2.09637	1.45598		731.862	1.90209	1.2856		769.97	2.65274	0.462975		738.639	3.36474	0.842318		418.633	1.57678	0.173231		456.568	1.73834	0.285362		711.041	2.71756	0.410226		341.662	2.02257	0.37838						714.305	2.72404	1.78502		732.49	2.03553	1.53203
732.671	2.31935	1.52108		732.671	2.10137	1.45716		732.671	1.90646	1.28774		770.721	2.65076	0.450635		739.339	3.3647	0.816558		418.24	1.57789	0.172927		456.215	1.74147	0.286818		711.682	2.71535	0.398457		341.304	2.02351	0.37847						715.083	2.75665	1.78065		733.3	2.04063	1.53349
733.48	2.32375	1.52374		733.48	2.10635	1.45835		733.48	1.91083	1.28986		771.471	2.64856	0.438462		740.04	3.36382	0.79114		417.848	1.579	0.172644		455.862	1.74461	0.288323		712.322	2.71289	0.386882		340.947	2.02446	0.37858						715.86	2.78974	1.77512		734.11	2.04567	1.53493
734.289	2.32822	1.52656		734.289	2.11129	1.45953		734.289	1.91521	1.29195		772.222	2.64614	0.426459		740.741	3.36213	0.766101		417.456	1.58011	0.172381		455.51	1.74775	0.28988		712.963	2.71016	0.375505		340.59	2.02543	0.37869						716.638	2.82326	1.76836		734.92	2.05065	1.53636
735.098	2.33278	1.52955		735.098	2.11621	1.46073		735.098	1.91958	1.29401		772.973	2.64351	0.41463		741.441	3.35968	0.741474		417.066	1.58121	0.172139		455.159	1.75088	0.29149		713.604	2.7072	0.364335		340.234	2.0264	0.37882						717.415	2.85719	1.76031		735.73	2.05557	1.53779
735.907	2.33745	1.53271		735.907	2.12111	1.46193		735.907	1.92396	1.29605		773.724	2.64068	0.402977		742.142	3.35649	0.717288		416.676	1.58231	0.171917		454.808	1.75401	0.293155		714.244	2.70402	0.353375		339.879	2.02739	0.37897						718.193	2.89145	1.7509		736.54	2.06043	1.53923
736.716	2.34222	1.53602		736.716	2.12598	1.46315		736.716	1.92833	1.29806		774.474	2.63765	0.391501		742.843	3.35261	0.693569		416.286	1.58341	0.171716		454.457	1.75714	0.294877		714.885	2.70061	0.342632		339.524	2.0284	0.37913						718.97	2.92598	1.74008		737.35	2.06524	1.54067
737.525	2.34712	1.5395		737.525	2.13082	1.46438		737.525	1.93269	1.30005		775.225	2.63444	0.380206		743.544	3.34808	0.67034		415.898	1.58451	0.171535		454.108	1.76025	0.296657		715.526	2.69701	0.332108		339.171	2.02941	0.37931						719.748	2.96073	1.72778		738.16	2.06998	1.54213
738.334	2.35216	1.54315		738.334	2.13565	1.46563		738.334	1.93706	1.30202		775.976	2.63106	0.369092		744.244	3.34293	0.647619		415.51	1.5856	0.171375		453.758	1.76337	0.298497		716.166	2.69321	0.321806		338.818	2.03044	0.3795						720.525	2.99561	1.71394		738.97	2.07466	1.54361
739.143	2.35734	1.54694		739.143	2.14045	1.4669		739.143	1.94141	1.30396		776.727	2.6275	0.358161		744.945	3.33721	0.625423		415.123	1.58669	0.171235		453.409	1.76647	0.300398		716.807	2.68923	0.31173		338.465	2.03148	0.37971						721.303	3.03054	1.69852		739.78	2.07929	1.54512
739.952	2.36269	1.5509		739.952	2.14523	1.4682		739.952	1.94576	1.30589		777.477	2.62379	0.347413		745.646	3.33095	0.603764		414.737	1.58778	0.171115		453.061	1.76956	0.302363		717.447	2.68509	0.30188		338.114	2.03253	0.37993						722.081	3.06543	1.68146		740.59	2.08387	1.54666
740.761	2.3682	1.555		740.761	2.14999	1.46952		740.761	1.95009	1.30779		778.228	2.61991	0.336849		746.346	3.3242	0.582653		414.351	1.58886	0.171015		452.714	1.77264	0.304392		718.088	2.68079	0.292259		337.763	2.0336	0.38017						722.858	3.10017	1.66272		741.4	2.08839	1.54824
741.57	2.3739	1.55925		741.57	2.15473	1.47088		741.57	1.95442	1.30967		778.979	2.61589	0.32647		747.047	3.31698	0.562097		413.966	1.58994	0.170936		452.366	1.7757	0.306486		718.729	2.67635	0.282866		337.413	2.03467	0.38043						723.636	3.13465	1.64226		742.21	2.09286	1.54987
742.379	2.37979	1.56365		742.379	2.15946	1.47226		742.379	1.95874	1.31154		779.73	2.61173	0.316277		747.748	3.30934	0.542101		413.582	1.59101	0.170877		452.02	1.77874	0.308647		719.369	2.67177	0.273702		337.064	2.03576	0.3807						724.413	3.16877	1.62005		743.02	2.09729	1.55155
743.188	2.38588	1.56818		743.188	2.16418	1.47369		743.188	1.96304	1.31339		780.48	2.60743	0.306268		748.448	3.30132	0.522667		413.198	1.59208	0.170837		451.674	1.78176	0.310877		720.01	2.66707	0.264767		336.715	2.03686	0.38099						725.191	3.2024	1.59606		743.83	2.10167	1.55329
743.997	2.3922	1.57284		743.997	2.16889	1.47515		743.997	1.96734	1.31522		781.231	2.603	0.296445		749.149	3.29294	0.503795		412.815	1.59314	0.170818		451.328	1.78476	0.313175		720.651	2.66225	0.256059		336.367	2.03797	0.3813						725.968	3.2354	1.5703		744.64	2.10602	1.55509
744.806	2.39874	1.57762		744.806	2.17359	1.47665		744.806	1.97161	1.31704		781.982	2.59845	0.286807		749.85	3.28424	0.485485		412.433	1.5942	0.170819		450.983	1.78774	0.315542		721.291	2.65734	0.247576		336.02	2.03909	0.38162						726.746	3.26764	1.54275		745.45	2.11033	1.55695
745.615	2.40553	1.58252		745.615	2.17829	1.4782		745.615	1.97588	1.31885		782.733	2.59379	0.277354		750.551	3.27525	0.467733		412.052	1.59525	0.170839		450.638	1.79068	0.31798		721.932	2.65232	0.239319		335.674	2.04022	0.38196						727.523	3.29899	1.51343		746.26	2.11461	1.55889
746.424	2.41256	1.58753		746.424	2.18298	1.47979		746.424	1.98012	1.32065		783.483	2.58901	0.268085		751.251	3.266	0.450533		411.671	1.59629	0.170879		450.294	1.79359	0.320488		722.573	2.64723	0.231283		335.328	2.04136	0.38232						728.301	3.3293	1.48238		747.07	2.11886	1.5609
747.233	2.41986	1.59263		747.233	2.18767	1.48144		747.233	1.98435	1.32244		784.234	2.58412	0.259		751.952	3.25652	0.433881		411.291	1.59733	0.170939		449.951	1.79647	0.323067		723.213	2.64206	0.223468		334.983	2.04251	0.3827						729.078	3.35842	1.44962		747.88	2.1231	1.56299
748.042	2.42743	1.59783		748.042	2.19237	1.48313		748.042	1.98857	1.32422		784.985	2.57914	0.250098		752.653	3.24684	0.417768		410.912	1.59837	0.171018		449.608	1.79931	0.325717		723.854	2.63682	0.215869		334.639	2.04367	0.38309						729.856	3.38622	1.41522		748.69	2.12732	1.56517
748.851	2.43528	1.6031		748.851	2.19708	1.48487		748.851	1.99276	1.326		785.736	2.57406	0.241378		753.353	3.23698	0.402186		410.533	1.59939	0.171116		449.266	1.80212	0.328437		724.494	2.63152	0.208485		334.295	2.04484	0.38351						730.633	3.41255	1.37926		749.5	2.13154	1.56743
749.66	2.44343	1.60844		749.66	2.2018	1.48667		749.66	1.99694	1.32777		786.486	2.56889	0.23284		754.054	3.22696	0.387125		410.156	1.60041	0.171235		448.924	1.80487	0.331228		725.135	2.62617	0.201313		333.952	2.04603	0.38394						731.411	3.43727	1.34181		750.31	2.13575	1.56978
750.469	2.45188	1.61384		750.469	2.20653	1.48852		750.469	2.00109	1.32954		787.237	2.56363	0.224483		754.755	3.21682	0.372576		409.778	1.60142	0.171372		448.582	1.80758	0.334088		725.776	2.62078	0.194347		333.61	2.04722	0.38439						732.188	3.46025	1.30298		751.12	2.13997	1.57223
751.278	2.46064	1.61928		751.278	2.21128	1.49044		751.278	2.00523	1.33131		787.988	2.55829	0.216305		755.455	3.20656	0.358527		409.402	1.60243	0.171529		448.241	1.81024	0.337018		726.416	2.61534	0.187586		333.268	2.04842	0.38486						732.966	3.48137	1.2629		751.93	2.1442	1.57477
752.087	2.46972	1.62475		752.087	2.21605	1.49241		752.087	2.00934	1.33309		788.739	2.55288	0.208307		756.156	3.19622	0.344968		409.026	1.60342	0.171704		447.901	1.81285	0.340015		727.057	2.60988	0.181026		332.928	2.04963	0.38536						733.743	3.50053	1.22169		752.74	2.14844	1.57741
752.896	2.47914	1.63024		752.896	2.22085	1.49444		752.896	2.01343	1.33487		789.489	2.5474	0.200486		756.857	3.18581	0.331886		408.651	1.60441	0.171899		447.561	1.8154	0.343079		727.698	2.60439	0.174661		332.587	2.05084	0.38587						734.521	3.51761	1.17949		753.55	2.15271	1.58014
753.705	2.48889	1.63574		753.705	2.22568	1.49653		753.705	2.01751	1.33665		790.24	2.54184	0.192842		757.558	3.17534	0.319269		408.277	1.60539	0.172113		447.222	1.81789	0.346209		728.338	2.59889	0.16849		332.248	2.05207	0.3864						735.298	3.53253	1.13648		754.36	2.15701	1.58298
754.514	2.49898	1.64122		754.514	2.23055	1.49868		754.514	2.02155	1.33845		790.991	2.53623	0.185374		758.258	3.16484	0.307105		407.903	1.60636	0.172345		446.883	1.82032	0.349402		728.979	2.59337	0.162507		331.909	2.05331	0.38695						736.076	3.54523	1.09281		755.17	2.16134	1.58592
755.323	2.50943	1.64668		755.323	2.23545	1.5009		755.323	2.02558	1.34026		791.742	2.53056	0.178081		758.959	3.15431	0.295382		407.53	1.60732	0.172596		446.545	1.82268	0.352657		729.62	2.58784	0.156709		331.571	2.05455	0.38752						736.853	3.55566	1.04866		755.98	2.16572	1.58895
756.132	2.52023	1.6521		756.132	2.2404	1.50318		756.132	2.02958	1.34208		792.492	2.52483	0.170961		759.66	3.14378	0.284086		407.157	1.60827	0.172866		446.207	1.82497	0.355972		730.26	2.58231	0.15109		331.234	2.0558	0.38811						737.631	3.56377	1.00421		756.79	2.17015	1.5921
756.941	2.53139	1.65746		756.941	2.24539	1.50552		756.941	2.03356	1.34392		793.243	2.51905	0.164014		760.36	3.13325	0.273206		406.786	1.60921	0.173154		445.87	1.8272	0.359345		730.901	2.57679	0.145648		330.897	2.05706	0.38872						738.408	3.56956	0.959644		757.6	2.17463	1.59534
757.75	2.54293	1.66275		757.75	2.25044	1.50793		757.75	2.03752	1.34577		793.994	2.51323	0.157239		761.061	3.12274	0.262728		406.415	1.61014	0.17346		445.533	1.82935	0.362774		731.542	2.57126	0.140378		330.561	2.05832	0.38935						739.186	3.57303	0.915147		758.41	2.17918	1.59868
758.559	2.55483	1.66794		758.559	2.25554	1.51039		758.559	2.04146	1.34766		794.745	2.50736	0.150633		761.762	3.11226	0.252639		406.044	1.61106	0.173785		445.197	1.83142	0.366255		732.182	2.56575	0.135275		330.226	2.0596	0.39001						739.963	3.5742	0.8709		759.22	2.1838	1.60212
759.368	2.56711	1.67303		759.368	2.26071	1.51293		759.368	2.04537	1.34956		795.495	2.50145	0.144197		762.462	3.10181	0.242929		405.675	1.61197	0.174128		444.861	1.83342	0.369787		732.823	2.56025	0.130336		329.891	2.06087	0.39068						740.741	3.57312	0.827083		760.03	2.1885	1.60566
760.177	2.57977	1.67799		760.177	2.26594	1.51552		760.177	2.04926	1.3515		796.246	2.49551	0.137928		763.163	3.09141	0.233583		405.306	1.61287	0.174488		444.526	1.83534	0.373366		733.463	2.55477	0.125556		329.557	2.06216	0.39138						741.518	3.56984	0.783866		760.84	2.19328	1.6093
760.986	2.5928	1.6828		760.986	2.27124	1.51818		760.986	2.05313	1.35346		796.997	2.48953	0.131827		763.864	3.08106	0.22459		404.937	1.61376	0.174866		444.191	1.83717	0.376989		734.104	2.54931	0.120931		329.224	2.06345	0.3921						742.296	3.56445	0.741414		761.65	2.19815	1.61303
761.795	2.60621	1.68745		761.795	2.27661	1.52089		761.795	2.05698	1.35546		797.748	2.48353	0.125891		764.565	3.07078	0.215939		404.57	1.61463	0.175262		443.857	1.83893	0.380655		734.745	2.54388	0.116456		328.892	2.06475	0.39284						743.073	3.55704	0.69988		762.46	2.20312	1.61686
762.604	2.62001	1.69192		762.604	2.28207	1.52367		762.604	2.06081	1.3575		798.498	2.4775	0.120119		765.265	3.06056	0.207616		404.203	1.6155	0.175675		443.523	1.84059	0.384358		735.385	2.53847	0.112129		328.56	2.06605	0.3936						743.851	3.54771	0.659402		763.27	2.20819	1.62077
763.413	2.63418	1.69619		763.413	2.2876	1.5265		763.413	2.06462	1.35958		799.249	2.47145	0.11451		765.966	3.05042	0.199612		403.836	1.61635	0.176105		443.19	1.84217	0.388097		736.026	2.53309	0.107944		328.228	2.06736	0.39439						744.629	3.53658	0.620108		764.08	2.21337	1.62478
764.222	2.64872	1.70023		764.222	2.29323	1.52939		764.222	2.06841	1.36171		800	2.46539	0.109063		766.667	3.04036	0.191914		403.471	1.61718	0.176552		442.857	1.84367	0.391868		736.667	2.52774	0.103897		327.898	2.06867	0.39519						745.406	3.52379	0.58211		764.89	2.21866	1.62886
765.031	2.66364	1.70403		765.031	2.29895	1.53233		765.031	2.07219	1.36388		800.751	2.45931	0.103777		767.367	3.03038	0.184513		403.106	1.61801	0.177016		442.525	1.84507	0.395668		737.307	2.52243	0.0999851		327.568	2.06999	0.39602						746.184	3.50946	0.545503		765.7	2.22408	1.63303
765.84	2.67892	1.70757		765.84	2.30477	1.53533		765.84	2.07595	1.3661		801.502	2.45321	0.0986492		768.068	3.0205	0.177396		402.741	1.61881	0.177497		442.193	1.84639	0.399494		737.948	2.51715	0.0962039		327.239	2.07132	0.39688						746.961	3.49375	0.510368		766.51	2.22963	1.63728
766.649	2.69457	1.71082		766.649	2.31069	1.53838		766.649	2.07969	1.36838		802.252	2.44711	0.0936796		768.769	3.0107	0.170554		402.378	1.61961	0.177993		441.862	1.84761	0.403341		738.589	2.5119	0.0925496		326.91	2.07264	0.39775						747.739	3.47679	0.476769		767.32	2.2353	1.6416
767.458	2.71057	1.71378		767.458	2.31672	1.54147		767.458	2.08343	1.37072		803.003	2.44101	0.0888664		769.469	3.001	0.163977		402.015	1.62039	0.178506		441.531	1.84875	0.407208		739.229	2.5067	0.0890184		326.582	2.07397	0.39865						748.516	3.45873	0.444753		768.13	2.24112	1.64598
768.267	2.72692	1.71642		768.267	2.32286	1.54461		768.267	2.08715	1.37312		803.754	2.4349	0.0842082		770.17	2.9914	0.157656		401.652	1.62116	0.179035		441.201	1.84979	0.41109		739.87	2.50154	0.0856066		326.255	2.07531	0.39958						749.294	3.43973	0.414351		768.94	2.24708	1.65044
769.076	2.74361	1.71871		769.076	2.32912	1.54779		769.076	2.09087	1.37559		804.505	2.4288	0.0797034		770.871	2.98191	0.151579		401.291	1.62191	0.179579		440.871	1.85074	0.414984		740.511	2.49642	0.0823106		325.928	2.07665	0.40052						750.071	3.41993	0.385581		769.75	2.25319	1.65495
769.885	2.76064	1.72064		769.885	2.33549	1.55101		769.885	2.09458	1.37813		805.255	2.4227	0.0753505		771.572	2.97251	0.14574		400.93	1.62264	0.180138		440.542	1.85161	0.418887		741.151	2.49135	0.0791269		325.602	2.07799	0.40149						750.849	3.39947	0.358445		770.56	2.25945	1.65952
770.694	2.77798	1.7222		770.694	2.34199	1.55427		770.694	2.0983	1.38074		806.006	2.41661	0.0711479		772.272	2.96323	0.140128		400.569	1.62336	0.180712		440.213	1.85238	0.422797		741.792	2.48631	0.0760519		325.277	2.07933	0.40249						751.626	3.37849	0.332931		771.37	2.26587	1.66414
771.503	2.79562	1.72335		771.503	2.34862	1.55756		771.503	2.10201	1.38343		806.757	2.41053	0.0670938		772.973	2.95405	0.134735		400.209	1.62406	0.181301		439.885	1.85307	0.426709		742.432	2.48133	0.0730825		324.952	2.08067	0.40351						752.404	3.35711	0.309015		772.18	2.27245	1.6688
772.312	2.81357	1.72409		772.312	2.35538	1.56088		772.312	2.10573	1.38621		807.508	2.40446	0.0631867		773.674	2.94498	0.129552		399.85	1.62474	0.181904		439.557	1.85366	0.430622		743.073	2.47639	0.0702151		324.628	2.08202	0.40455						753.181	3.33547	0.286663		772.99	2.2792	1.67351
773.121	2.83179	1.7244		773.121	2.36227	1.56422		773.121	2.10946	1.38907		808.258	2.39842	0.0594246		774.374	2.93602	0.124573		399.492	1.62541	0.182521		439.23	1.85417	0.434531		743.714	2.4715	0.0674467		324.305	2.08337	0.40562						753.959	3.31367	0.265831		773.8	2.28612	1.67825
773.93	2.85028	1.72426		773.93	2.36931	1.56758		773.93	2.11321	1.39202		809.009	2.39239	0.0558058		775.075	2.92717	0.119788		399.134	1.62606	0.183151		438.903	1.85459	0.438434		744.354	2.46665	0.0647741		323.982	2.08472	0.40671						754.736	3.29182	0.246465		774.61	2.29321	1.68302
774.739	2.86901	1.72364		774.739	2.37648	1.57096		774.739	2.11697	1.39506		809.76	2.38639	0.0523282		775.776	2.91843	0.115191		398.777	1.62669	0.183795		438.577	1.85493	0.442329		744.995	2.46186	0.0621942		323.66	2.08607	0.40783						755.514	3.27001	0.228508		775.42	2.30049	1.68781
775.548	2.88798	1.72254		775.548	2.38381	1.57435		775.548	2.12076	1.3982		810.511	2.38042	0.0489898		776.476	2.9098	0.110775		398.42	1.6273	0.184451		438.251	1.85518	0.446212		745.636	2.45711	0.0597041		323.339	2.08742	0.40897						756.291	3.24834	0.211893		776.23	2.30794	1.69261
776.357	2.90716	1.72094		776.357	2.39128	1.57775		776.357	2.12458	1.40144		811.261	2.37448	0.0457885		777.177	2.90128	0.106532		398.064	1.62789	0.18512		437.926	1.85535	0.450082		746.276	2.45241	0.0573008		323.018	2.08877	0.41013						757.069	3.22688	0.196553		777.04	2.31558	1.69743
777.166	2.92653	1.71883		777.166	2.39891	1.58115		777.166	2.12844	1.40479		812.012	2.36857	0.0427222		777.878	2.89288	0.102456		397.709	1.62846	0.1858		437.601	1.85544	0.453936		746.917	2.44776	0.0549816		322.698	2.09012	0.41132						757.846	3.20569	0.182415		777.85	2.32341	1.70225
777.975	2.94608	1.71619		777.975	2.40669	1.58455		777.975	2.13234	1.40825		812.763	2.36269	0.0397886		778.579	2.88458	0.0985402		397.354	1.62902	0.186491		437.276	1.85545	0.457771		747.558	2.44316	0.0527438		322.378	2.09147	0.41254						758.624	3.18482	0.169405		778.66	2.33143	1.70707
778.784	2.96577	1.71302		778.784	2.41464	1.58794		778.784	2.13628	1.41181		813.514	2.35686	0.0369853		779.279	2.8764	0.0947788		397	1.62955	0.187193		436.952	1.85537	0.461586		748.198	2.43862	0.0505846		322.059	2.09282	0.41378						759.401	3.16434	0.157451		779.47	2.33964	1.71189
779.593	2.9856	1.70929		779.593	2.42274	1.59132		779.593	2.14029	1.41549		814.264	2.35106	0.0343098		779.98	2.86832	0.0911656		396.647	1.63006	0.187906		436.629	1.85522	0.465378		748.839	2.43412	0.0485016		321.741	2.09417	0.41505						760.179	3.14427	0.146478		780.28	2.34804	1.71668
780.402	3.00554	1.705		780.402	2.43101	1.59468		780.402	2.14436	1.41928		815.015	2.34531	0.0317598		780.681	2.86036	0.0876951		396.294	1.63055	0.188628		436.306	1.855	0.469145		749.479	2.42967	0.0464921		321.423	2.09551	0.41634						760.956	3.12465	0.136414		781.09	2.35665	1.72146
781.211	3.02555	1.70014		781.211	2.43944	1.59801		781.211	2.1485	1.42319		815.766	2.33961	0.0293326		781.381	2.85251	0.0843616		395.942	1.63102	0.189358		435.984	1.8547	0.472886		750.12	2.42527	0.0445538		321.106	2.09685	0.41766						761.734	3.1055	0.127189		781.9	2.36545	1.7262
782.02	3.04563	1.6947		782.02	2.44804	1.60132		782.02	2.15273	1.42722		816.517	2.33395	0.0270255		782.082	2.84476	0.0811599		395.59	1.63146	0.190098		435.662	1.85433	0.476599		750.761	2.42092	0.0426844		320.79	2.09819	0.419						762.511	3.08683	0.118737		782.71	2.37445	1.73091
782.829	3.06575	1.68867		782.829	2.45681	1.60459		782.829	2.15705	1.43137		817.267	2.32835	0.0248358		782.783	2.83712	0.0780849		395.24	1.63189	0.190844		435.34	1.85389	0.480282		751.401	2.41663	0.0408814		320.474	2.09953	0.42037						763.289	3.06866	0.110991		783.52	2.38366	1.73558
783.638	3.08587	1.68206		783.638	2.46576	1.60783		783.638	2.16147	1.43564		818.018	2.3228	0.0227607		783.483	2.82959	0.0751317		394.889	1.63229	0.191598		435.019	1.85338	0.483934		752.042	2.41238	0.0391429		320.159	2.10087	0.42177						764.066	3.05099	0.103891		784.33	2.39307	1.7402
784.447	3.10598	1.67485		784.447	2.47487	1.61101		784.447	2.166	1.44002		818.769	2.31731	0.0207973		784.184	2.82216	0.0722956		394.54	1.63266	0.192357		434.698	1.85281	0.487554		752.683	2.40818	0.0374664		319.844	2.1022	0.42319						764.844	3.03382	0.0973799		785.14	2.40268	1.74476
785.256	3.12605	1.66705		785.256	2.48416	1.61414		785.256	2.17066	1.44453		819.52	2.31188	0.0189426		784.885	2.81484	0.069572		394.191	1.63301	0.193122		434.378	1.85217	0.49114		753.323	2.40403	0.0358501		319.53	2.10352	0.42464						765.622	3.01715	0.0914036		785.95	2.41249	1.74926
786.065	3.14606	1.65865		786.065	2.49363	1.61722		786.065	2.17545	1.44914		820.27	2.3065	0.0171938		785.586	2.80762	0.0669566		393.842	1.63334	0.193891		434.059	1.85147	0.494692		753.964	2.39993	0.0342919		319.217	2.10485	0.42611						766.399	3.00098	0.0859125		786.76	2.42252	1.75369
786.874	3.16597	1.64965		786.874	2.50327	1.62023		786.874	2.18039	1.45387		821.021	2.30119	0.0155476		786.286	2.80051	0.0644452		393.494	1.63365	0.194664		433.739	1.85071	0.498207		754.605	2.39588	0.0327898		318.904	2.10616	0.42761						767.177	2.98528	0.0808606		787.57	2.43274	1.75804
787.683	3.18576	1.64006		787.683	2.51309	1.62317		787.683	2.18548	1.45871		821.772	2.29594	0.0140011		786.987	2.79349	0.0620338		393.147	1.63393	0.195439		433.421	1.84988	0.501686		755.245	2.39188	0.031342		318.592	2.10747	0.42914						767.954	2.97006	0.0762059		788.38	2.44317	1.7623
788.492	3.20541	1.62988		788.492	2.52309	1.62603		788.492	2.19075	1.46364		822.523	2.29075	0.0125511		787.688	2.78658	0.0597186		392.801	1.63418	0.196216		433.103	1.84901	0.505128		755.886	2.38792	0.0299466		318.281	2.10878	0.43069						768.732	2.9553	0.0719097		789.19	2.4538	1.76647
789.301	3.22489	1.61911		789.301	2.53326	1.6288		789.301	2.19619	1.46867		823.273	2.28564	0.0111945		788.388	2.77976	0.0574958		392.455	1.63441	0.196993		432.785	1.84807	0.508531		756.527	2.38402	0.0286018		317.97	2.11008	0.43227						769.509	2.94098	0.0679371		790	2.46464	1.77054
790.11	3.24418	1.60775		790.11	2.54361	1.63149		790.11	2.20182	1.47378		824.024	2.28059	0.00992792		789.089	2.77304	0.055362		392.109	1.63461	0.19777		432.468	1.84708	0.511895		757.167	2.38016	0.027306		317.66	2.11137	0.43388						770.287	2.92709	0.0642564		790.81	2.47568	1.77451
790.919	3.26325	1.59583		790.919	2.55414	1.63408		790.919	2.20766	1.47897		824.775	2.27561	0.00874831		789.79	2.76642	0.0533135		391.765	1.63479	0.198544		432.151	1.84605	0.51522		757.808	2.37635	0.0260575		317.35	2.11266	0.43551						771.064	2.91361	0.0608391		791.62	2.48691	1.77836
791.728	3.28207	1.58333		791.728	2.56484	1.63657		791.728	2.2137	1.48422		825.526	2.2707	0.00765241		790.49	2.75989	0.0513473		391.421	1.63494	0.199316		431.834	1.84496	0.518504		758.448	2.37258	0.0248547		317.041	2.11393	0.43716						771.842	2.90053	0.0576595		792.43	2.49835	1.78209
792.537	3.30063	1.57029		792.537	2.57572	1.63894		792.537	2.21997	1.48953		826.276	2.26586	0.00663699		791.191	2.75346	0.04946		391.077	1.63507	0.200083		431.518	1.84382	0.521749		759.089	2.36886	0.023696		316.733	2.1152	0.43885						772.619	2.88782	0.0546945		793.24	2.50998	1.78569
793.346	3.3189	1.55669		793.346	2.58678	1.6412		793.346	2.22646	1.49487		827.027	2.26109	0.00569882		791.892	2.74712	0.0476487		390.734	1.63517	0.200844		431.203	1.84264	0.524952		759.73	2.36519	0.02258		316.425	2.11646	0.44056						773.397	2.87549	0.0519236		794.05	2.52181	1.78915
794.155	3.33685	1.54256		794.155	2.59801	1.64334		794.155	2.23319	1.50024		827.778	2.2564	0.00483469		792.593	2.74087	0.0459105		390.392	1.63525	0.201599		430.888	1.84141	0.528115		760.37	2.36156	0.0215051		316.117	2.11772	0.4423						774.174	2.8635	0.0493285		794.86	2.53384	1.79248
794.964	3.35447	1.52792		794.964	2.60941	1.64535		794.964	2.24016	1.50561		828.529	2.25178	0.00404141		793.293	2.73471	0.0442425		390.05	1.6353	0.202345		430.574	1.84013	0.531236		761.011	2.35798	0.0204701		315.811	2.11896	0.44406						774.952	2.85184	0.0468929		795.67	2.54605	1.79565
795.773	3.37174	1.51277		795.773	2.62097	1.64723		795.773	2.24737	1.51098		829.279	2.24723	0.00331579		793.994	2.72863	0.0426421		389.709	1.63532	0.203081		430.259	1.83882	0.534316		761.652	2.35444	0.0194734		315.505	2.12019	0.44585						775.729	2.8405	0.0446023		796.48	2.55845	1.79867
796.582	3.38863	1.49713		796.582	2.63271	1.64896		796.582	2.25482	1.51631		830.03	2.24276	0.00265471		794.695	2.72265	0.0411067		389.368	1.63532	0.203805		429.946	1.83746	0.537354		762.292	2.35095	0.0185139		315.199	2.12142	0.44766						776.507	2.82947	0.0424437		797.29	2.57103	1.80152
797.391	3.40512	1.48101		797.391	2.64462	1.65055		797.391	2.26251	1.5216		830.781	2.23836	0.00205505		795.395	2.71675	0.0396338		389.028	1.6353	0.204516		429.633	1.83607	0.540351		762.933	2.3475	0.0175903		314.894	2.12263	0.44951						777.284	2.81872	0.0404059		798.1	2.58379	1.8042
798.2	3.42121	1.46444		798.2	2.65668	1.65198		798.2	2.27045	1.52683		831.532	2.23403	0.00151375		796.096	2.71093	0.038221		388.689	1.63525	0.205212		429.32	1.83464	0.543306		763.574	2.34409	0.0167013		314.59	2.12383	0.45137						778.062	2.80825	0.0384788		798.91	2.59673	1.80671
799.009	3.43686	1.44744		799.009	2.66891	1.65325		799.009	2.27862	1.53198		832.282	2.22978	0.0010278		796.797	2.7052	0.036866		388.35	1.63518	0.205892		429.008	1.83317	0.54622		764.214	2.34073	0.0158458		314.286	2.12502	0.45327						778.839	2.79805	0.0366534		799.72	2.60985	1.80904
799.818	3.45207	1.43001		799.818	2.6813	1.65436		799.818	2.28701	1.53703		833.033	2.2256	0.000594256		797.497	2.69955	0.0355666		388.012	1.63509	0.206554		428.696	1.83167	0.549092		764.855	2.3374	0.0150225		313.983	2.1262	0.45519						779.617	2.7881	0.0349218		800.53	2.62313	1.81117
800.627	3.46683	1.41218		800.627	2.69384	1.65529		800.627	2.29561	1.54196		833.784	2.2215	0.000210212		798.198	2.69398	0.0343207		387.675	1.63498	0.207195		428.385	1.83014	0.551923		765.495	2.33412	0.0142305		313.681	2.12736	0.45714						780.394	2.77839	0.0332771		801.34	2.63658	1.81312
801.436	3.48111	1.39396		801.436	2.70653	1.65605		801.436	2.30442	1.54676		834.535	2.21747	-0.00012716		798.899	2.68849	0.0331262		387.338	1.63484	0.207816		428.074	1.82857	0.554713		766.136	2.33088	0.0134686		313.379	2.12851	0.45911						781.172	2.76891	0.0317129		802.15	2.65019	1.81486
802.245	3.4949	1.37539		802.245	2.71937	1.65662		802.245	2.31341	1.55143		835.285	2.21351	-0.00042062		799.6	2.68307	0.0319813		387.001	1.63469	0.208413		427.763	1.82697	0.557462		766.777	2.32768	0.0127359		313.077	2.12965	0.46111						781.949	2.75965	0.0302237		802.96	2.66395	1.81639
803.054	3.5082	1.35648		803.054	2.73236	1.657		803.054	2.32256	1.55594		836.036	2.20963	-0.000672855		800.3	2.67774	0.0308839		386.665	1.63452	0.208985		427.453	1.82534	0.56017		767.417	2.32452	0.0120312		312.777	2.13078	0.46313						782.727	2.7506	0.0288047		803.77	2.67786	1.81771
803.863	3.52099	1.33724		803.863	2.74549	1.65719		803.863	2.33187	1.56029		836.787	2.20581	-0.000886475		801.001	2.67248	0.0298324		386.33	1.63434	0.20953		427.144	1.82369	0.562837		768.058	2.3214	0.0113537		312.477	2.13189	0.46518						783.504	2.74175	0.0274515		804.58	2.69192	1.81881
804.672	3.53326	1.3177		804.672	2.75875	1.65718		804.672	2.3413	1.56449		837.538	2.20207	-0.00106401		801.702	2.66729	0.0288249		385.996	1.63415	0.210047		426.835	1.822	0.565464		768.699	2.31832	0.0107024		312.177	2.13298	0.46726						784.282	2.7331	0.02616		805.39	2.70612	1.81969
805.481	3.54501	1.29789		805.481	2.77215	1.65696		805.481	2.35084	1.56852		838.288	2.1984	-0.00120791		802.402	2.66217	0.0278599		385.661	1.63394	0.210535		426.526	1.82029	0.568051		769.339	2.31527	0.0100764		311.878	2.13406	0.46936						785.059	2.72464	0.0249268		806.2	2.72045	1.82035
806.29	3.55623	1.27781		806.29	2.78568	1.65653		806.29	2.36046	1.5724		839.039	2.19479	-0.00132054		803.103	2.65713	0.0269356		385.328	1.63373	0.210992		426.218	1.81856	0.570598		769.98	2.31227	0.00947488		311.579	2.13513	0.47148						785.837	2.71635	0.0237487		807.01	2.73491	1.82077
807.099	3.56692	1.2575		807.099	2.79933	1.65588		807.099	2.37015	1.57613		839.79	2.19126	-0.00140418		803.804	2.65216	0.0260506		384.995	1.63351	0.211417		425.91	1.8168	0.573105		770.621	2.3093	0.00889696		311.281	2.13617	0.47363						786.615	2.70824	0.0226227		807.82	2.74949	1.82095
807.908	3.57705	1.23697		807.908	2.8131	1.65501		807.908	2.37989	1.57972		840.541	2.18779	-0.00146101		804.505	2.64726	0.0252033		384.663	1.63329	0.211809		425.603	1.81502	0.575573		771.261	2.30637	0.00834185		310.984	2.13721	0.47581						787.392	2.70029	0.0215464		808.63	2.76419	1.82089
808.717	3.58665	1.21625		808.717	2.82699	1.65392		808.717	2.38966	1.58318		841.291	2.18439	-0.00149315		805.205	2.64242	0.0243924		384.331	1.63307	0.212167		425.296	1.81321	0.578002		771.902	2.30347	0.00780875		310.687	2.13822	0.47801						788.17	2.6925	0.0205173		809.44	2.779	1.82059
809.526	3.59569	1.19535		809.526	2.84099	1.65259		809.526	2.39946	1.58654		842.042	2.18105	-0.0015026		805.906	2.63766	0.0236164		384	1.63285	0.212492		424.99	1.81138	0.580393		772.543	2.30061	0.00729691		310.391	2.13922	0.48024						788.947	2.68487	0.0195331		810.25	2.79392	1.82004
810.335	3.60418	1.1743		810.335	2.85509	1.65103		810.335	2.40926	1.5898		842.793	2.17778	-0.0014913		806.607	2.63295	0.0228741		383.669	1.63264	0.212782		424.684	1.80953	0.582746		773.183	2.29779	0.0068056		310.095	2.1402	0.48249						789.725	2.67739	0.018592		811.06	2.80893	1.81923
811.144	3.61211	1.15311		811.144	2.86929	1.64924		811.144	2.41906	1.593		843.544	2.17457	-0.00146108		807.307	2.62832	0.0221641		383.339	1.63245	0.213038		424.378	1.80767	0.58506		773.824	2.295	0.00633412		309.8	2.14116	0.48476						790.502	2.67005	0.017692		811.87	2.82403	1.81817
811.953	3.61949	1.13181		811.953	2.88359	1.64719		811.953	2.42886	1.59616		844.294	2.17142	-0.00141369		808.008	2.62374	0.0214853		383.01	1.63227	0.21326		424.073	1.80578	0.587337		774.464	2.29224	0.00588177		309.506	2.1421	0.48706						791.28	2.66285	0.0168313		812.68	2.83922	1.81686
812.762	3.62632	1.11041		812.762	2.89797	1.6449		812.762	2.43867	1.5993		845.045	2.16833	-0.0013508		808.709	2.61923	0.0208365		382.681	1.6321	0.213451		423.768	1.80387	0.589577		775.105	2.28952	0.0054479		309.212	2.14302	0.48938						792.057	2.65578	0.0160084		813.49	2.85448	1.81528
813.571	3.63259	1.08894		813.571	2.91244	1.64236		813.571	2.44848	1.60244		845.796	2.1653	-0.00127398		809.409	2.61478	0.0202165		382.352	1.63197	0.21361		423.464	1.80195	0.59178		775.746	2.28683	0.00503187		308.918	2.14392	0.49172						792.835	2.64884	0.0152217		814.3	2.86982	1.81344
814.38	3.63831	1.06741		814.38	2.92699	1.63957		814.38	2.45831	1.60561		846.547	2.16233	-0.00118474		810.11	2.6104	0.0196242		382.024	1.63185	0.213741		423.16	1.80001	0.593947		776.386	2.28417	0.00463307		308.626	2.1448	0.49409						793.612	2.64203	0.0144699		815.11	2.88522	1.81133
815.189	3.64348	1.04584		815.189	2.94162	1.63651		815.189	2.46817	1.60883		847.297	2.15941	-0.00108448		810.811	2.60607	0.0190586		381.697	1.63177	0.213845		422.857	1.79805	0.596078		777.027	2.28155	0.0042509		308.333	2.14566	0.49649						794.39	2.63535	0.0137515		815.92	2.90068	1.80896
815.998	3.64811	1.02426		815.998	2.95631	1.6332		815.998	2.47808	1.61211		848.048	2.15655	-0.000974537		811.512	2.6018	0.0185188		381.37	1.63173	0.213925		422.554	1.79608	0.598173		777.668	2.27896	0.00388479		308.042	2.1465	0.4989						795.167	2.62878	0.0130652		816.73	2.9162	1.80631
816.807	3.65219	1.00268		816.807	2.97106	1.62962		816.807	2.48806	1.61549		848.799	2.15374	-0.000856165		812.212	2.59758	0.0180036		381.044	1.63172	0.213986		422.252	1.79409	0.600232		778.308	2.2764	0.00353418		307.75	2.14731	0.50134						795.945	2.62232	0.0124099		817.54	2.93176	1.8034
817.616	3.65573	0.98111		817.616	2.98587	1.62576		817.616	2.49815	1.61896		849.55	2.15099	-0.000730542		812.913	2.59343	0.0175123		380.719	1.63175	0.214031		421.95	1.79209	0.602257		778.949	2.27387	0.00319854		307.46	2.14811	0.5038						796.722	2.61598	0.0117844		818.35	2.94736	1.80022
818.425	3.65873	0.95958		818.425	3.00074	1.62164		818.425	2.50835	1.62255		850.3	2.14828	-0.00059877		813.614	2.58933	0.0170439		380.394	1.63183	0.214064		421.648	1.79007	0.604247		779.59	2.27137	0.00287734		307.17	2.14888	0.50628						797.5	2.60975	0.0111875		819.16	2.963	1.79677
819.234	3.6612	0.9381		819.234	3.01565	1.61724		819.234	2.51872	1.62625		851.051	2.14563	-0.000461883		814.314	2.58528	0.0165974		380.069	1.63195	0.214091		421.347	1.78804	0.606203		780.23	2.2689	0.00257009		306.88	2.14963	0.50878						798.277	2.60363	0.0106182		819.97	2.97866	1.79305
820.043	3.66315	0.91669		820.043	3.03059	1.61257		820.043	2.52927	1.63007		851.802	2.14302	-0.000320844		815.015	2.58129	0.0161722		379.745	1.63212	0.214117		421.046	1.786	0.608125		780.871	2.26646	0.00227631		306.591	2.15036	0.51131						799.055	2.59761	0.0100754		820.78	2.99435	1.78905
820.852	3.66459	0.89537		820.852	3.04558	1.60761		820.852	2.54005	1.63401		852.553	2.14046	-0.000176548		815.716	2.57735	0.0157674		379.422	1.63234	0.214146		420.746	1.78395	0.610014		781.512	2.26405	0.00199551		306.303	2.15106	0.51385						799.832	2.59168	0.00955817		821.59	3.01005	1.78478
821.661	3.66551	0.87415		821.661	3.06059	1.60237		821.661	2.55108	1.63806		853.303	2.13795	-2.98294e-05		816.416	2.57346	0.0153821		379.099	1.63261	0.214186		420.446	1.78188	0.611869		782.152	2.26167	0.00172727		306.015	2.15173	0.51642						800.61	2.58586	0.00906555		822.4	3.02577	1.78024
822.47	3.66592	0.85304		822.47	3.07562	1.59685		822.47	2.5624	1.6422		854.054	2.13548	0.000118541		817.117	2.56962	0.0150158		378.777	1.63293	0.214242		420.147	1.7798	0.613692		782.793	2.25932	0.00147112		305.727	2.15239	0.51901						801.387	2.58013	0.00859659		823.21	3.04149	1.77543
823.279	3.66584	0.83207		823.279	3.09068	1.59104		823.279	2.57404	1.64643		854.805	2.13306	0.000267851		817.818	2.56584	0.0146676		378.455	1.6333	0.21432		419.847	1.77771	0.615482		783.433	2.257	0.00122667		305.441	2.15301	0.52161						802.165	2.5745	0.00815042		824.02	3.05721	1.77034
824.088	3.66527	0.81125		824.088	3.10574	1.58493		824.088	2.58603	1.65072		855.556	2.13068	0.000417444		818.519	2.5621	0.0143369		378.134	1.63371	0.214425		419.549	1.77561	0.61724		784.074	2.2547	0.000993489		305.154	2.15362	0.52424						802.942	2.56896	0.00772615		824.83	3.07294	1.76498
824.897	3.66422	0.79058		824.897	3.12081	1.57853		824.897	2.5984	1.65503		856.306	2.12834	0.000566717		819.219	2.55841	0.014023		377.814	1.63417	0.214563		419.251	1.7735	0.618966		784.715	2.25243	0.000771193		304.868	2.15419	0.52689						803.72	2.5635	0.00732297		825.64	3.08865	1.75936
825.706	3.6627	0.7701		825.706	3.13588	1.57183		825.706	2.61118	1.65936		857.057	2.12604	0.000715117		819.92	2.55477	0.0137252		377.493	1.63467	0.21474		418.953	1.77138	0.620661		785.355	2.25019	0.0005594		304.583	2.15474	0.52955						804.497	2.55814	0.00694005		826.45	3.10435	1.75346
826.515	3.66072	0.7498		826.515	3.15094	1.56484		826.515	2.62439	1.66365		857.808	2.12378	0.00086214		820.621	2.55117	0.013443		377.174	1.6352	0.21496		418.656	1.76925	0.622324		785.996	2.24797	0.000357742		304.299	2.15526	0.53224						805.275	2.55285	0.00657661		827.26	3.12004	1.74729
827.324	3.65828	0.72971		827.324	3.16599	1.55754		827.324	2.63805	1.66787		858.559	2.12155	0.00100733		821.321	2.54763	0.0131758		376.855	1.63577	0.215228		418.359	1.76711	0.623957		786.637	2.24578	0.000165862		304.014	2.15576	0.53494						806.052	2.54765	0.0062319		828.07	3.13571	1.74084
828.133	3.6554	0.70984		828.133	3.18103	1.54994		828.133	2.65216	1.67199		859.309	2.11936	0.00115027		822.022	2.54412	0.0129229		376.537	1.63636	0.215548		418.062	1.76497	0.625559		787.277	2.24361	-1.65817e-05		303.731	2.15622	0.53766						806.83	2.54253	0.00590518		828.88	3.15136	1.73413
828.942	3.65209	0.69019		828.942	3.19604	1.54204		828.942	2.66675	1.67596		860.06	2.11721	0.00129058		822.723	2.54066	0.0126839		376.219	1.63698	0.215922		417.766	1.76281	0.627132		787.918	2.24147	-0.000189922		303.448	2.15666	0.5404						807.607	2.53749	0.00559573		829.69	3.16698	1.72715
829.751	3.64836	0.67079		829.751	3.21102	1.53382		829.751	2.68181	1.67974		860.811	2.11509	0.00142793		823.423	2.53725	0.0124581		375.901	1.63762	0.216353		417.47	1.76065	0.628674		788.559	2.23935	-0.00035448		303.165	2.15707	0.54315						808.385	2.53253	0.00530287		830.5	3.18258	1.7199
830.56	3.64422	0.65164		830.56	3.22596	1.52529		830.56	2.69734	1.68328		861.562	2.11301	0.00156203		824.124	2.53388	0.0122452		375.584	1.63826	0.216842		417.175	1.75848	0.630186		789.199	2.23726	-0.000510565		302.883	2.15746	0.54592						809.163	2.52764	0.00502593		831.31	3.19814	1.71237
831.369	3.63968	0.63275		831.369	3.24086	1.51644		831.369	2.71334	1.68654		862.312	2.11096	0.0016926		824.825	2.53055	0.0120446		375.268	1.63891	0.217392		416.88	1.7563	0.63167		789.84	2.23519	-0.000658478		302.602	2.15781	0.54871						809.94	2.52283	0.00476425		832.12	3.21367	1.70458
832.178	3.63475	0.61415		832.178	3.25571	1.50728		832.178	2.72979	1.68949		863.063	2.10894	0.00181941		825.526	2.52726	0.0118557		374.952	1.63956	0.218002		416.586	1.75411	0.633124		790.48	2.23315	-0.000798509		302.321	2.15813	0.55151						810.718	2.51809	0.00451721		832.93	3.22917	1.6965
832.987	3.62945	0.59582		832.987	3.27051	1.4978		832.987	2.74668	1.69207		863.814	2.10695	0.00194226		826.226	2.52401	0.0116783		374.637	1.6402	0.218672		416.292	1.75192	0.63455		791.121	2.23113	-0.000930936		302.04	2.15843	0.55433						811.495	2.51342	0.0042842		833.74	3.24462	1.68816
833.796	3.6238	0.57779		833.796	3.28524	1.48799		833.796	2.76399	1.69425		864.565	2.10499	0.00206098		826.927	2.5208	0.0115117		374.322	1.64084	0.219401		415.998	1.74972	0.635947		791.762	2.22913	-0.00105603		301.76	2.15869	0.55716						812.273	2.50882	0.00406464		834.55	3.26004	1.67954
834.605	3.61779	0.56007		834.605	3.2999	1.47785		834.605	2.78168	1.69599		865.315	2.10306	0.0021754		827.628	2.51764	0.0113557		374.008	1.64145	0.220187		415.705	1.74751	0.637316		792.402	2.22716	-0.00117406		301.481	2.15892	0.56001						813.05	2.50428	0.00385795		835.36	3.27542	1.67064
835.414	3.61145	0.54266		835.414	3.31448	1.46739		835.414	2.79973	1.69727		866.066	2.10115	0.00228542		828.328	2.51451	0.0112097		373.695	1.64205	0.221029		415.412	1.7453	0.638657		793.043	2.2252	-0.00128527		301.202	2.15913	0.56287						813.828	2.49981	0.00366358		836.17	3.29075	1.66145
836.223	3.60479	0.52557		836.223	3.32898	1.45659		836.223	2.81812	1.69805		866.817	2.09928	0.00239092		829.029	2.51142	0.0110734		373.381	1.64261	0.221924		415.12	1.74308	0.63997		793.684	2.22327	-0.0013899		300.923	2.1593	0.56574						814.605	2.49541	0.00348101		836.98	3.30604	1.65198
837.032	3.59782	0.50881		837.032	3.34339	1.44546		837.032	2.83679	1.69832		867.568	2.09743	0.00249182		829.73	2.50836	0.0109465		373.069	1.64315	0.222869		414.828	1.74085	0.641255		794.324	2.22136	-0.0014882		300.645	2.15944	0.56863						815.383	2.49107	0.00330971		837.79	3.32127	1.64222
837.841	3.59056	0.49239		837.841	3.35769	1.43398		837.841	2.85573	1.69805		868.318	2.0956	0.00258806		830.43	2.50535	0.0108284		372.757	1.64365	0.223861		414.537	1.73862	0.642514		794.965	2.21947	-0.00158039		300.368	2.15955	0.57153						816.16	2.48679	0.00314918		838.6	3.33646	1.63217
838.65	3.58303	0.4763		838.65	3.37188	1.42216		838.65	2.87488	1.69723		869.069	2.0938	0.00267959		831.131	2.50237	0.010719		372.445	1.64412	0.224897		414.246	1.73639	0.643745		795.606	2.21761	-0.0016667		300.091	2.15963	0.57444						816.938	2.48258	0.00299896		839.41	3.35159	1.62182
839.459	3.57522	0.46057		839.459	3.38595	1.40999		839.459	2.89421	1.69585		869.82	2.09202	0.0027664		831.832	2.49943	0.0106178		372.134	1.64455	0.225973		413.955	1.73415	0.64495		796.246	2.21576	-0.00174733		299.815	2.15967	0.57736						817.715	2.47842	0.00285856		840.22	3.36666	1.61116
840.268	3.56718	0.44519		840.268	3.39989	1.39748		840.268	2.91369	1.69391		870.571	2.09027	0.00284845		832.533	2.49652	0.0105245		371.824	1.64493	0.227086		413.665	1.7319	0.646128		796.887	2.21393	-0.0018225		299.539	2.15968	0.58029						818.493	2.47432	0.00272755		841.03	3.38168	1.6002
841.077	3.55889	0.43016		841.077	3.41369	1.38461		841.077	2.93327	1.69141		871.321	2.08854	0.00292575		833.233	2.49364	0.0104388		371.514	1.64527	0.228232		413.375	1.72965	0.64728		797.528	2.21213	-0.00189239		299.264	2.15966	0.58323						819.27	2.47028	0.00260549		841.84	3.39662	1.58891
841.886	3.55039	0.41549		841.886	3.42734	1.37139		841.886	2.95294	1.68835		872.072	2.08683	0.00299832		833.934	2.4908	0.0103604		371.204	1.64557	0.229408		413.085	1.7274	0.648406		798.168	2.21034	-0.00195722		298.989	2.15961	0.58618						820.048	2.4663	0.00249195		842.65	3.4115	1.5773
842.695	3.54168	0.40119		842.695	3.44083	1.3578		842.695	2.97265	1.68474		872.823	2.08514	0.00306618		834.635	2.488	0.0102889		370.895	1.64581	0.230609		412.796	1.72514	0.649505		798.809	2.20857	-0.00201715		298.714	2.15953	0.58914						820.825	2.46237	0.00238655		843.46	3.4263	1.56536
843.504	3.53279	0.38725		843.504	3.45414	1.34386		843.504	2.99237	1.68059		873.574	2.08348	0.00312936		835.335	2.48522	0.0102242		370.587	1.64601	0.231833		412.507	1.72287	0.650579		799.449	2.20682	-0.00207238		298.441	2.15941	0.59211						821.603	2.45849	0.00228889		844.27	3.44101	1.55308
844.313	3.52372	0.37368		844.313	3.46726	1.32955		844.313	3.0121	1.67592		874.324	2.08183	0.00318791		836.036	2.48248	0.0101659		370.279	1.64617	0.233075		412.219	1.7206	0.651627		800.09	2.2051	-0.00212308		298.167	2.15926	0.59509						822.38	2.45467	0.0021986		845.08	3.45564	1.54045
845.122	3.51449	0.36048		845.122	3.48018	1.31487		845.122	3.03179	1.67073		875.075	2.0802	0.00324188		836.737	2.47978	0.0101138		369.971	1.64627	0.234333		411.931	1.71833	0.65265		800.731	2.20338	-0.00216941		297.894	2.15907	0.59808						823.158	2.45089	0.00211531		845.89	3.47016	1.52746
845.931	3.50511	0.34764		845.931	3.49288	1.29983		845.931	3.05144	1.66504		875.826	2.07859	0.00329133		837.437	2.4771	0.0100676		369.664	1.64633	0.235603		411.644	1.71606	0.653648		801.371	2.20169	-0.00221154		297.622	2.15885	0.60107						823.935	2.44717	0.00203868		846.7	3.48457	1.5141
846.74	3.49561	0.33517		846.74	3.50535	1.28442		846.74	3.07103	1.65887		876.577	2.077	0.00333632		838.138	2.47445	0.0100271		369.358	1.64634	0.236882		411.357	1.71378	0.654621		802.012	2.20002	-0.00224963		297.35	2.1586	0.60406						824.713	2.4435	0.00196837		847.51	3.49886	1.50037
847.549	3.48598	0.32307		847.549	3.51757	1.26865		847.549	3.09055	1.65222		877.327	2.07543	0.00337693		838.839	2.47184	0.00999196		369.052	1.6463	0.238168		411.07	1.71149	0.655568		802.653	2.19836	-0.00228382		297.079	2.15831	0.60707						825.49	2.43988	0.00190406		848.32	3.51302	1.48625
848.358	3.47626	0.31133		848.358	3.52954	1.2525		848.358	3.10999	1.64512		878.078	2.07387	0.00341324		839.54	2.46925	0.00996204		368.747	1.64622	0.239458		410.784	1.70921	0.656491		803.293	2.19672	-0.00231427		296.808	2.15799	0.61008						826.268	2.4363	0.00184545		849.13	3.52702	1.47173
849.167	3.46644	0.29995		849.167	3.54122	1.23599		849.167	3.12935	1.63758		878.829	2.07234	0.00344533		840.24	2.4667	0.00993709		368.442	1.64609	0.240748		410.498	1.70692	0.657389		803.934	2.1951	-0.00234112		296.538	2.15764	0.61309						827.045	2.43277	0.00179223		849.94	3.54086	1.45681
849.976	3.45655	0.28893		849.976	3.5526	1.21911		849.976	3.14862	1.6296		879.58	2.07081	0.00347329		840.941	2.46417	0.00991689		368.137	1.64591	0.242038		410.213	1.70463	0.658263		804.575	2.1935	-0.00236451		296.268	2.15725	0.61611						827.823	2.42929	0.00174412		850.75	3.55452	1.44149
850.785	3.4466	0.27827		850.785	3.56367	1.20187		850.785	3.1678	1.6212		880.33	2.06931	0.0034972		841.642	2.46167	0.00990126		367.833	1.64569	0.243325		409.928	1.70233	0.659113		805.215	2.19191	-0.00238456		295.999	2.15682	0.61913						828.6	2.42585	0.00170085		851.56	3.56797	1.42574
851.594	3.43659	0.26795		851.594	3.5744	1.18428		851.594	3.18689	1.61238		881.081	2.06782	0.00351717		842.342	2.4592	0.00988997		367.53	1.64543	0.244606		409.643	1.70003	0.659938		805.856	2.19034	-0.00240142		295.73	2.15636	0.62215						829.378	2.42246	0.00166214		852.37	3.5812	1.40957
852.403	3.42655	0.25799		852.403	3.58479	1.16633		852.403	3.20589	1.60315		881.832	2.06634	0.00353328		843.043	2.45676	0.00988285		367.227	1.64513	0.245881		409.359	1.69773	0.660739		806.496	2.18878	-0.0024152		295.461	2.15587	0.62517						830.156	2.41911	0.00162774		853.18	3.59419	1.39297
853.212	3.41648	0.24836		853.212	3.59479	1.14804		853.212	3.22481	1.59351		882.583	2.06488	0.00354563		843.744	2.45434	0.0098797		366.925	1.64479	0.247146		409.075	1.69543	0.661516		807.137	2.18724	-0.00242602		295.193	2.15534	0.6282						830.933	2.4158	0.00159742		853.99	3.6069	1.37593
854.021	3.4064	0.23907		854.021	3.60441	1.12941		854.021	3.24364	1.58345		883.333	2.06343	0.00355433		844.444	2.45195	0.00988036		366.623	1.64441	0.248402		408.791	1.69312	0.66227		807.778	2.18572	-0.002434		294.926	2.15478	0.63123						831.711	2.41254	0.00157094		854.8	3.61932	1.35846
854.83	3.39631	0.23011		854.83	3.61361	1.11045		854.83	3.26239	1.57297		884.084	2.062	0.00355947		845.145	2.44959	0.00988464		366.321	1.64399	0.249646		408.508	1.69081	0.662999		808.418	2.18421	-0.00243925		294.659	2.15418	0.63425						832.488	2.40931	0.00154807		855.61	3.63142	1.34056
855.639	3.38623	0.22148		855.639	3.62238	1.09117		855.639	3.28105	1.56207		884.835	2.06058	0.00356116		845.846	2.44725	0.00989237		366.021	1.64354	0.250876		408.225	1.6885	0.663705		809.059	2.18272	-0.00244188		294.393	2.15355	0.63728						833.266	2.40613	0.00152859		856.42	3.64317	1.32223
856.448	3.37616	0.21316		856.448	3.63069	1.07159		856.448	3.29963	1.55075		885.586	2.05918	0.00355949		846.547	2.44494	0.00990341		365.72	1.64305	0.252093		407.943	1.68619	0.664388		809.7	2.18124	-0.002442		294.127	2.15288	0.64031						834.043	2.40298	0.00151231		857.23	3.65454	1.30347
857.257	3.36613	0.20515		857.257	3.63853	1.05172		857.257	3.31812	1.53898		886.336	2.05778	0.00355458		847.247	2.44266	0.00991759		365.42	1.64252	0.253294		407.661	1.68388	0.665047		810.34	2.17978	-0.00243971		293.861	2.15218	0.64333						834.821	2.39988	0.00149902		858.04	3.6655	1.28428
858.066	3.35612	0.19745		858.066	3.64588	1.03158		858.066	3.33651	1.52676		887.087	2.0564	0.00354652		847.948	2.4404	0.00993476		365.121	1.64197	0.25448		407.38	1.68156	0.665683		810.981	2.17833	-0.0024351		293.596	2.15145	0.64635						835.598	2.39681	0.00148854		858.85	3.67602	1.26469
858.875	3.34616	0.19004		858.875	3.65271	1.01118		858.875	3.35481	1.51408		887.838	2.05503	0.00353542		848.649	2.43816	0.00995478		364.822	1.64138	0.255648		407.098	1.67924	0.666295		811.622	2.1769	-0.00242828		293.332	2.15068	0.64937						836.376	2.39378	0.00148068		859.66	3.68608	1.2447
859.684	3.33625	0.18292		859.684	3.65902	0.99055		859.684	3.37299	1.50093		888.589	2.05368	0.00352137		849.349	2.43595	0.00997752		364.523	1.64077	0.256799		406.818	1.67692	0.666884		812.262	2.17548	-0.00241933		293.068	2.14987	0.65239						837.153	2.39078	0.00147527		860.47	3.69564	1.22433
860.493	3.3264	0.17609		860.493	3.66478	0.9697		860.493	3.39106	1.48728		889.339	2.05233	0.00350448		850.05	2.43376	0.0100028		364.225	1.64012	0.257931		406.537	1.6746	0.66745		812.903	2.17407	-0.00240834		292.804	2.14903	0.6554						837.931	2.38782	0.00147215		861.28	3.70467	1.20359
861.302	3.31662	0.16952		861.302	3.66997	0.94865		861.302	3.40899	1.47313		890.09	2.051	0.00348486		850.751	2.43159	0.0100306		363.928	1.63945	0.259044		406.257	1.67228	0.667993		813.544	2.17268	-0.0023954		292.541	2.14816	0.65841						838.708	2.3849	0.00147115		862.09	3.71315	1.18251
862.111	3.3069	0.16322		862.111	3.67459	0.92744		862.111	3.42677	1.45846		890.841	2.04968	0.00346259		851.451	2.42945	0.0100607		363.631	1.63875	0.260137		405.978	1.66995	0.668513		814.184	2.1713	-0.0023806		292.278	2.14725	0.66141						839.486	2.38201	0.00147213		862.9	3.72104	1.16112
862.92	3.29727	0.15718		862.92	3.67861	0.90609		862.92	3.44438	1.44326		891.592	2.04837	0.00343777		852.152	2.42733	0.0100929		363.335	1.63803	0.261211		405.699	1.66763	0.66901		814.825	2.16994	-0.002364		292.016	2.14631	0.66441						840.263	2.37915	0.00147493		863.71	3.72833	1.13943
863.729	3.28772	0.15139		863.729	3.68203	0.88462		863.729	3.46179	1.42752		892.342	2.04707	0.00341051		852.853	2.42524	0.0101273		363.039	1.63728	0.262264		405.42	1.6653	0.669484		815.465	2.16859	-0.00234569		291.754	2.14533	0.6674						841.041	2.37633	0.00147942		864.52	3.73498	1.11749
864.538	3.27826	0.14584		864.538	3.68484	0.86306		864.538	3.47898	1.41121		893.093	2.04578	0.0033809		853.554	2.42316	0.0101637		362.743	1.63651	0.263297		405.141	1.66297	0.669936		816.106	2.16725	-0.00232575		291.493	2.14432	0.67039						841.818	2.37354	0.00148547		865.33	3.74098	1.09532
865.347	3.26889	0.14052		865.347	3.68702	0.84145		865.347	3.49593	1.39435		893.844	2.0445	0.00334904		854.254	2.42111	0.0102019		362.448	1.63572	0.264308		404.863	1.66065	0.670364		816.747	2.16593	-0.00230425		291.232	2.14328	0.67337						842.596	2.37078	0.00149295		866.14	3.7463	1.07296
866.156	3.25961	0.13543		866.156	3.68858	0.81982		866.156	3.5126	1.3769		894.595	2.04323	0.003315		854.955	2.41908	0.0102418		362.153	1.6349	0.265298		404.586	1.65832	0.67077		817.387	2.16462	-0.00228125		290.972	2.1422	0.67633						843.373	2.36805	0.00150174		866.95	3.75094	1.05045
866.965	3.25044	0.13055		866.965	3.6895	0.79819		866.965	3.52896	1.35888		895.345	2.04197	0.0032789		855.656	2.41706	0.0102835		361.859	1.63407	0.266266		404.308	1.65599	0.671153		818.028	2.16332	-0.00225684		290.712	2.14109	0.67929						844.151	2.36536	0.00151173		867.76	3.75488	1.02782
867.774	3.24137	0.12589		867.774	3.6898	0.77659		867.774	3.54498	1.34028		896.096	2.04072	0.00324082		856.356	2.41507	0.0103266		361.566	1.63322	0.267213		404.031	1.65366	0.671513		818.669	2.16203	-0.00223106		290.453	2.13994	0.68225						844.928	2.36269	0.0015228		868.57	3.75811	1.00511
868.583	3.23241	0.12142		868.583	3.68946	0.75507		868.583	3.56062	1.32109		896.847	2.03948	0.00320083		857.057	2.4131	0.0103713		361.272	1.63235	0.268137		403.755	1.65133	0.671851		819.309	2.16075	-0.00220398		290.194	2.13876	0.68519						845.706	2.36006	0.00153486		869.38	3.76062	0.98238
869.392	3.22356	0.11715		869.392	3.68849	0.73364		869.392	3.57584	1.30133		897.598	2.03825	0.00315904		857.758	2.41115	0.0104173		360.98	1.63147	0.26904		403.479	1.649	0.672166		819.95	2.15949	-0.00217567		289.936	2.13755	0.68812						846.483	2.35745	0.00154779		870.19	3.76242	0.95965
870.201	3.21483	0.11306		870.201	3.68689	0.71236		870.201	3.5906	1.28099		898.348	2.03703	0.00311552		858.458	2.40922	0.0104647		360.688	1.63057	0.269921		403.203	1.64667	0.672458		820.591	2.15824	-0.00214619		289.678	2.13631	0.69104						847.261	2.35487	0.00156152		871	3.7635	0.93697
871.01	3.2062	0.10916		871.01	3.68469	0.69123		871.01	3.60486	1.26009		899.099	2.03582	0.00307036		859.159	2.40731	0.0105132		360.396	1.62965	0.270779		402.927	1.64434	0.672728		821.231	2.157	-0.00211559		289.42	2.13504	0.69395						848.038	2.35233	0.00157594		871.81	3.76387	0.91438
871.819	3.19769	0.10542		871.819	3.68188	0.67031		871.819	3.6186	1.23865		899.85	2.03462	0.00302363		859.86	2.40542	0.0105629		360.105	1.62872	0.271615		402.652	1.64201	0.672975		821.872	2.15578	-0.00208393		289.163	2.13373	0.69685						848.816	2.3498	0.00159097		872.62	3.76354	0.89192
872.628	3.1893	0.10186		872.628	3.67847	0.64961		872.628	3.63175	1.21667		900.601	2.03342	0.00297542		860.561	2.40355	0.0106136		359.814	1.62777	0.27243		402.378	1.63968	0.6732		822.513	2.15456	-0.00205126		288.906	2.13239	0.69973						849.593	2.34731	0.00160653		873.43	3.76252	0.86964
873.437	3.18102	0.09844		873.437	3.67449	0.62916		873.437	3.6443	1.19419		901.351	2.03223	0.0029258		861.261	2.4017	0.0106653		359.524	1.62682	0.273222		402.103	1.63735	0.673402		823.153	2.15335	-0.00201763		288.65	2.13102	0.7026						850.371	2.34484	0.00162255		874.24	3.76082	0.84756
874.246	3.17286	0.09518		874.246	3.66995	0.609		874.246	3.65619	1.17124		902.102	2.03106	0.00287484		861.962	2.39986	0.0107179		359.234	1.62585	0.273991		401.83	1.63502	0.673581		823.794	2.15216	-0.0019831		288.395	2.12961	0.70546						851.149	2.3424	0.00163895		875.05	3.75847	0.82572
875.055	3.16482	0.09207		875.055	3.66487	0.58915		875.055	3.6674	1.14783		902.853	2.02989	0.00282262		862.663	2.39804	0.0107713		358.944	1.62487	0.274739		401.556	1.63269	0.673738		824.434	2.15098	-0.0019477		288.139	2.12818	0.70831						851.926	2.33999	0.00165566		875.86	3.75548	0.80417
875.864	3.1569	0.08909		875.864	3.65927	0.56963		875.864	3.67789	1.124		903.604	2.02872	0.00276921		863.363	2.39625	0.0108255		358.655	1.62388	0.275465		401.283	1.63037	0.673872		825.075	2.14981	-0.0019115		287.885	2.12672	0.71114						852.704	2.3376	0.00167261		876.67	3.75188	0.78292
876.673	3.1491	0.08624		876.673	3.65318	0.55047		876.673	3.68763	1.0998		904.354	2.02757	0.00271468		864.064	2.39446	0.0108803		358.367	1.62288	0.276169		401.01	1.62804	0.673984		825.716	2.14864	-0.00187452		287.63	2.12522	0.71395						853.481	2.33524	0.00168975		877.48	3.7477	0.76202
877.482	3.14141	0.08352		877.482	3.64661	0.53168		877.482	3.69659	1.07525		905.105	2.02642	0.00265909		864.765	2.3927	0.0109359		358.079	1.62187	0.276851		400.738	1.62572	0.674073		826.356	2.14749	-0.00183683		287.376	2.1237	0.71675						854.259	2.3329	0.00170701		878.29	3.74296	0.74148
878.291	3.13384	0.08092		878.291	3.63958	0.51329		878.291	3.70475	1.05041		905.856	2.02528	0.0026025		865.465	2.39095	0.0109919		357.791	1.62085	0.277511		400.466	1.62339	0.67414		826.997	2.14635	-0.00179845		287.123	2.12214	0.71954						855.036	2.33058	0.00172434		879.1	3.73768	0.72133
879.1	3.12639	0.07844		879.1	3.63214	0.49532		879.1	3.71209	1.02532		906.607	2.02415	0.00254499		866.166	2.38922	0.0110486		357.504	1.61983	0.27815		400.194	1.62107	0.674184		827.638	2.14522	-0.00175943		286.87	2.12056	0.7223						855.814	2.32829	0.00174168		879.91	3.73191	0.70159
879.909	3.11906	0.07606		879.909	3.6243	0.47777		879.909	3.71859	1.00003		907.357	2.02303	0.00248662		866.867	2.38751	0.0111056		357.218	1.6188	0.278767		399.923	1.61875	0.674205		828.278	2.1441	-0.00171981		286.617	2.11894	0.72505						856.591	2.32602	0.00175899		880.72	3.72566	0.68228
880.718	3.11184	0.07379		880.718	3.61608	0.46066		880.718	3.72424	0.97457		908.108	2.02191	0.00242743		867.568	2.38581	0.0111631		356.932	1.61776	0.279363		399.652	1.61643	0.674204		828.919	2.14299	-0.00167963		286.365	2.1173	0.72779						857.369	2.32378	0.00177622		881.53	3.71898	0.66341
881.527	3.10474	0.07161		881.527	3.60753	0.444		881.527	3.72902	0.94902		908.859	2.0208	0.0023675		868.268	2.38413	0.0112209		356.646	1.61672	0.279937		399.381	1.61412	0.67418		829.56	2.14189	-0.00163892		286.114	2.11563	0.7305						858.146	2.32155	0.00179332		882.34	3.7119	0.645
882.336	3.09775	0.06954		882.336	3.59865	0.4278		882.336	3.73294	0.9234		909.61	2.0197	0.00230687		868.969	2.38247	0.0112791		356.361	1.61567	0.280491		399.111	1.6118	0.674133		830.2	2.1408	-0.00159771		285.862	2.11393	0.7332						858.924	2.31935	0.00181025		883.15	3.70443	0.62706
883.145	3.09087	0.06755		883.145	3.58949	0.41207		883.145	3.73599	0.89778		910.36	2.01861	0.0022456		869.67	2.38082	0.0113375		356.076	1.61462	0.281024		398.841	1.60949	0.674064		830.841	2.13972	-0.00155605		285.612	2.11221	0.73588						859.701	2.31718	0.00182698		883.96	3.69663	0.60959
883.954	3.0841	0.06564		883.954	3.58007	0.3968		883.954	3.73818	0.87221		911.111	2.01752	0.00218374		870.37	2.37919	0.0113961		355.792	1.61356	0.281537		398.571	1.60718	0.673972		831.481	2.13865	-0.00151397		285.361	2.11045	0.73854						860.479	2.31502	0.00184346		884.77	3.68851	0.59261
884.763	3.07744	0.06382		884.763	3.57041	0.38201		884.763	3.73952	0.84673		911.862	2.01644	0.00212135		871.071	2.37757	0.0114548		355.508	1.6125	0.282029		398.302	1.60488	0.673857		832.122	2.13759	-0.00147149		285.111	2.10867	0.74118						861.256	2.31288	0.00185967		885.58	3.68011	0.5761
885.572	3.07089	0.06207		885.572	3.56054	0.36769		885.572	3.74001	0.82139		912.613	2.01536	0.00205846		871.772	2.37596	0.0115137		355.224	1.61144	0.2825		398.034	1.60257	0.67372		832.763	2.13653	-0.00142865		284.862	2.10686	0.7438						862.034	2.31077	0.00187557		886.39	3.67145	0.56007
886.381	3.06444	0.0604		886.381	3.55049	0.35384		886.381	3.73968	0.79624		913.363	2.01429	0.00199514		872.472	2.37438	0.0115727		354.941	1.61037	0.282952		397.765	1.60027	0.673559		833.403	2.13549	-0.00138548		284.613	2.10503	0.7464						862.811	2.30867	0.00189112		887.2	3.66257	0.54453
887.19	3.0581	0.05879		887.19	3.54028	0.34046		887.19	3.73854	0.77132		914.114	2.01323	0.00193142		873.173	2.3728	0.0116317		354.659	1.6093	0.283384		397.497	1.59798	0.673376		834.044	2.13446	-0.001342		284.364	2.10317	0.74898						863.589	2.3066	0.00190631		888.01	3.65348	0.52946
887.999	3.05186	0.05725		887.999	3.52993	0.32754		887.999	3.73661	0.74667		914.865	2.01217	0.00186735		873.874	2.37124	0.0116908		354.377	1.60823	0.283796		397.229	1.59568	0.67317		834.685	2.13343	-0.00129825		284.116	2.10129	0.75154						864.366	2.30455	0.00192111		888.82	3.64423	0.51487
888.808	3.04573	0.05578		888.808	3.51947	0.31508		888.808	3.73393	0.72234		915.616	2.01113	0.00180298		874.575	2.3697	0.0117498		354.095	1.60716	0.284189		396.962	1.59339	0.672942		835.325	2.13241	-0.00125425		283.868	2.09938	0.75408						865.144	2.30251	0.00193549		889.63	3.63483	0.50075
889.617	3.03969	0.05436		889.617	3.50892	0.30308		889.617	3.73052	0.69836		916.366	2.01008	0.00173833		875.275	2.36817	0.0118087		353.814	1.60609	0.284563		396.695	1.59111	0.67269		835.966	2.1314	-0.00121002		283.621	2.09745	0.7566						865.921	2.30049	0.00194942		890.44	3.6253	0.48708
890.426	3.03375	0.053		890.426	3.4983	0.29152		890.426	3.7264	0.67476		917.117	2.00905	0.00167346		875.976	2.36665	0.0118675		353.533	1.60502	0.284918		396.429	1.58883	0.672416		836.607	2.1304	-0.0011656		283.374	2.09549	0.75909						866.699	2.2985	0.00196289		891.25	3.61567	0.47387
891.235	3.02791	0.05169		891.235	3.48763	0.2804		891.235	3.72162	0.65158		917.868	2.00802	0.00160841		876.677	2.36515	0.0119262		353.253	1.60395	0.285254		396.162	1.58655	0.672118		837.247	2.12941	-0.001121		283.128	2.09351	0.76156						867.476	2.29652	0.00197589		892.06	3.60595	0.4611
892.044	3.02216	0.05043		892.044	3.47692	0.2697		892.044	3.7162	0.62883		918.619	2.00699	0.0015432		877.377	2.36366	0.0119847		352.973	1.60288	0.285572		395.896	1.58428	0.671798		837.888	2.12843	-0.00107624		282.882	2.09151	0.76401						868.254	2.29456	0.00198838		892.87	3.59617	0.44876
892.853	3.0165	0.04922		892.853	3.4662	0.25943		892.853	3.71018	0.60656		919.369	2.00597	0.00147787		878.078	2.36219	0.012043		352.694	1.60181	0.285872		395.631	1.58201	0.671454		838.529	2.12745	-0.00103136		282.636	2.08948	0.76644						869.031	2.29262	0.00200036		893.68	3.58635	0.43684
893.662	3.01094	0.04805		893.662	3.45549	0.24955		893.662	3.7036	0.58477		920.12	2.00496	0.00141246		878.779	2.36072	0.0121011		352.415	1.60074	0.286154		395.366	1.57975	0.671088		839.169	2.12649	-0.000986368		282.391	2.08743	0.76884						869.809	2.29069	0.0020118		894.49	3.57649	0.42533
894.471	3.00546	0.04693		894.471	3.44478	0.24008		894.471	3.69649	0.56349		920.871	2.00395	0.00134701		879.479	2.35927	0.0121589		352.137	1.59968	0.286418		395.101	1.57749	0.670699		839.81	2.12553	-0.000941288		282.146	2.08536	0.77123						870.586	2.28879	0.00202271		895.3	3.56662	0.41422
895.28	3.00007	0.04584		895.28	3.43411	0.23099		895.28	3.68889	0.54273		921.622	2.00295	0.00128154		880.18	2.35784	0.0122165		351.858	1.59861	0.286665		394.836	1.57524	0.670287		840.45	2.12457	-0.000896139		281.902	2.08327	0.77358						871.364	2.2869	0.00203305		896.11	3.55675	0.40349
896.089	2.99476	0.0448		896.089	3.42348	0.22227		896.089	3.68083	0.52249		922.372	2.00196	0.00121608		880.881	2.35641	0.0122737		351.581	1.59755	0.286895		394.572	1.573	0.669851		841.091	2.12363	-0.000850942		281.658	2.08116	0.77592						872.141	2.28503	0.00204283		896.92	3.54689	0.39314
896.898	2.98954	0.04379		896.898	3.4129	0.2139		896.898	3.67235	0.50281		923.123	2.00097	0.00115066		881.582	2.355	0.0123307		351.304	1.5965	0.287108		394.309	1.57076	0.669393		841.732	2.1227	-0.000805714		281.415	2.07903	0.77822						872.919	2.28317	0.00205204		897.73	3.53705	0.38316
897.707	2.9844	0.04281		897.707	3.40239	0.20589		897.707	3.66348	0.48366		923.874	1.99998	0.00108532		882.282	2.3536	0.0123872		351.027	1.59544	0.287304		394.045	1.56852	0.668912		842.372	2.12177	-0.000760474		281.171	2.07688	0.78051						873.697	2.28133	0.00206065		898.54	3.52725	0.37352
898.516	2.97934	0.04187		898.516	3.39195	0.19821		898.516	3.65426	0.46507		924.625	1.999	0.00102008		882.983	2.35222	0.0124434		350.751	1.59439	0.287485		393.782	1.5663	0.668407		843.013	2.12085	-0.000715237		280.929	2.0747	0.78277						874.474	2.27951	0.00206867		899.35	3.5175	0.36422
899.325	2.97436	0.04096		899.325	3.3816	0.19086		899.325	3.64472	0.44704		925.375	1.99803	0.000954958		883.684	2.35084	0.0124992		350.475	1.59335	0.287649		393.519	1.56408	0.66788		843.654	2.11993	-0.000670022		280.687	2.07251	0.78501						875.252	2.2777	0.00207609		900.16	3.50779	0.35525
900.134	2.96946	0.04007		900.134	3.37134	0.18381		900.134	3.6349	0.42956		926.126	1.99706	0.000889988		884.384	2.34948	0.0125546		350.199	1.5923	0.287798		393.257	1.56187	0.66733		844.294	2.11903	-0.000624843		280.445	2.07031	0.78722						876.029	2.27591	0.00208291		900.97	3.49815	0.34659
900.943	2.96463	0.03921		900.943	3.36117	0.17707		900.943	3.62483	0.41263		926.877	1.9961	0.000825192		885.085	2.34813	0.0126095		349.924	1.59127	0.287931		392.995	1.55967	0.666756		844.935	2.11813	-0.000579715		280.203	2.06808	0.7894						876.807	2.27414	0.00208911		901.78	3.48857	0.33824
901.752	2.95987	0.03838		901.752	3.35111	0.17061		901.752	3.61452	0.39624		927.628	1.99514	0.000760592		885.786	2.34679	0.012664		349.65	1.59024	0.288049		392.733	1.55747	0.66616		845.576	2.11724	-0.000534655		279.963	2.06584	0.79156						877.584	2.27238	0.0020947		902.59	3.47907	0.33017
902.561	2.95518	0.03757		902.561	3.34115	0.16443		902.561	3.60403	0.3804		928.378	1.99419	0.000696212		886.486	2.34546	0.012718		349.376	1.58921	0.288153		392.472	1.55528	0.66554		846.216	2.11635	-0.000489675		279.722	2.06358	0.7937						878.362	2.27063	0.00209966		903.4	3.46964	0.32239
903.37	2.95057	0.03679		903.37	3.33131	0.15851		903.37	3.59336	0.36509		929.129	1.99324	0.000632071		887.187	2.34414	0.0127715		349.102	1.58819	0.288242		392.211	1.5531	0.664898		846.857	2.11547	-0.00044479		279.482	2.0613	0.79581						879.139	2.2689	0.00210401		904.21	3.4603	0.31487
904.179	2.94602	0.03603		904.179	3.32159	0.15284		904.179	3.58255	0.35031		929.88	1.9923	0.000568189		887.888	2.34284	0.0128245		348.829	1.58718	0.288317		391.951	1.55093	0.664233		847.497	2.1146	-0.000400011		279.242	2.05901	0.79789						879.917	2.26718	0.00210773		905.02	3.45104	0.30761
904.988	2.94154	0.03528		904.988	3.31198	0.14741		904.988	3.57163	0.33604		930.631	1.99137	0.000504587		888.589	2.34154	0.012877		348.556	1.58617	0.288379		391.69	1.54877	0.663545		848.138	2.11374	-0.000355353		279.003	2.0567	0.79995						880.694	2.26548	0.00211082		905.83	3.44187	0.3006
905.797	2.93713	0.03456		905.797	3.30251	0.14222		905.797	3.5606	0.32228		931.381	1.99043	0.000441282		889.289	2.34026	0.0129289		348.283	1.58517	0.288426		391.43	1.54662	0.662834		848.779	2.11288	-0.000310826		278.764	2.05437	0.80198						881.472	2.2638	0.00211329		906.64	3.4328	0.29383
906.606	2.93278	0.03385		906.606	3.29315	0.13725		906.606	3.54951	0.30902		932.132	1.98951	0.000378292		889.99	2.33899	0.0129803		348.011	1.58417	0.288461		391.171	1.54448	0.662101		849.419	2.11203	-0.000266443		278.525	2.05204	0.80398						882.249	2.26212	0.00211514		907.45	3.42382	0.28729
907.415	2.92849	0.03317		907.415	3.28393	0.13248		907.415	3.53835	0.29624		932.883	1.98859	0.000315634		890.691	2.33773	0.0130311		347.74	1.58318	0.288483		390.912	1.54235	0.661344		850.06	2.11119	-0.000222215		278.287	2.04968	0.80596						883.027	2.26046	0.00211636		908.26	3.41494	0.28096
908.224	2.92426	0.0325		908.224	3.27483	0.12792		908.224	3.52717	0.28393		933.634	1.98767	0.000253324		891.391	2.33647	0.0130813		347.469	1.5822	0.288492		390.653	1.54023	0.660565		850.701	2.11035	-0.000178151		278.05	2.04732	0.80792						883.804	2.25882	0.00211695		909.07	3.40617	0.27485
909.033	2.92009	0.03184		909.033	3.26586	0.12355		909.033	3.51596	0.27207		934.384	1.98676	0.000191376		892.092	2.33523	0.0131309		347.198	1.58123	0.28849		390.394	1.53812	0.659764		851.341	2.10952	-0.000134263		277.812	2.04494	0.80984						884.582	2.25718	0.00211693		909.88	3.39749	0.26894
909.842	2.91599	0.0312		909.842	3.25703	0.11936		909.842	3.50475	0.26067		935.135	1.98585	0.000129806		892.793	2.334	0.01318		346.927	1.58027	0.288475		390.136	1.53603	0.65894		851.982	2.10869	-9.056e-05		277.576	2.04255	0.81174						885.359	2.25557	0.00211628		910.69	3.38891	0.26322
910.651	2.91193	0.03057		910.651	3.24832	0.11535		910.651	3.49355	0.24969		935.886	1.98495	6.86275e-05		893.493	2.33278	0.0132284		346.658	1.57931	0.28845		389.878	1.53394	0.658094		852.623	2.10787	-4.70516e-05		277.339	2.04014	0.81362						886.137	2.25396	0.00211502		911.5	3.38043	0.25769
911.46	2.90794	0.02995		911.46	3.23975	0.1115		911.46	3.48238	0.23914		936.637	1.98405	7.85298e-06		894.194	2.33157	0.0132761		346.388	1.57836	0.288413		389.621	1.53187	0.657225		853.263	2.10706	-3.74681e-06		277.103	2.03773	0.81546						886.914	2.25237	0.00211314		912.31	3.37206	0.25233
912.269	2.904	0.02935		912.269	3.2313	0.10781		912.269	3.47125	0.22899		937.387	1.98316	-5.25048e-05		894.895	2.33037	0.0133233		346.119	1.57742	0.288365		389.364	1.5298	0.656334		853.904	2.10625	3.93459e-05		276.867	2.0353	0.81729						887.692	2.25079	0.00211065		913.12	3.36379	0.24714
913.078	2.90011	0.02876		913.078	3.22299	0.10427		913.078	3.46016	0.21923		938.138	1.98227	-0.000112434		895.596	2.32917	0.0133698		345.85	1.57649	0.288307		389.107	1.52776	0.655421		854.545	2.10545	8.22182e-05		276.632	2.03286	0.81908						888.469	2.24922	0.00210756		913.93	3.35563	0.24212
913.887	2.89627	0.02818		913.887	3.2148	0.10088		913.887	3.44914	0.20985		938.889	1.98139	-0.000171924		896.296	2.32799	0.0134156		345.582	1.57556	0.288239		388.85	1.52572	0.654487		855.185	2.10466	0.000124862		276.397	2.03041	0.82085						889.247	2.24766	0.00210386		914.74	3.34756	0.23726
914.696	2.89248	0.02761		914.696	3.20674	0.09762		914.696	3.43818	0.20083		939.64	1.98051	-0.000230963		896.997	2.32682	0.0134608		345.314	1.57465	0.288162		388.594	1.5237	0.65353		855.826	2.10387	0.00016727		276.163	2.02796	0.82259						890.024	2.24612	0.00209956		915.55	3.3396	0.23254
915.505	2.88875	0.02705		915.505	3.1988	0.09448		915.505	3.4273	0.19217		940.39	1.97963	-0.000289542		897.698	2.32566	0.0135053		345.047	1.57375	0.288075		388.338	1.52169	0.652552		856.466	2.10309	0.000209436		275.929	2.02549	0.8243						890.802	2.24459	0.00209467		916.36	3.33174	0.22797
916.314	2.88506	0.02649		916.314	3.19099	0.09148		916.314	3.41651	0.18385		941.141	1.97876	-0.000347651		898.398	2.3245	0.0135491		344.78	1.57285	0.28798		388.083	1.5197	0.651552		857.107	2.10231	0.000251351		275.695	2.02301	0.82599						891.579	2.24307	0.0020892		917.17	3.32398	0.22354
917.123	2.88142	0.02595		917.123	3.18331	0.08859		917.123	3.40581	0.17585		941.892	1.9779	-0.000405282		899.099	2.32336	0.0135922		344.513	1.57197	0.287876		387.828	1.51772	0.650531		857.748	2.10154	0.00029301		275.462	2.02053	0.82765						892.357	2.24156	0.00208314		917.98	3.31632	0.21924
917.932	2.87783	0.02542		917.932	3.17574	0.08581		917.932	3.3952	0.16817		942.643	1.97704	-0.000462426		899.8	2.32222	0.0136347		344.247	1.57109	0.287765		387.573	1.51575	0.649489		858.388	2.10077	0.000334406		275.229	2.01804	0.82929						893.134	2.24006	0.0020765		918.79	3.30876	0.21506
918.741	2.87428	0.02489		918.741	3.1683	0.08313		918.741	3.38469	0.16079		943.393	1.97618	-0.000519075		900.501	2.32109	0.0136764		343.982	1.57022	0.287646		387.318	1.51381	0.648426		859.029	2.10001	0.000375533		274.996	2.01553	0.83089						893.912	2.23858	0.00206929		919.6	3.30129	0.21101
919.55	2.87077	0.02437		919.55	3.16097	0.08056		919.55	3.3743	0.1537		944.144	1.97533	-0.000575221		901.201	2.31997	0.0137174		343.716	1.56937	0.287519		387.064	1.51187	0.647342		859.67	2.09926	0.000416387		274.764	2.01303	0.83248						894.69	2.23711	0.00206152		920.41	3.29392	0.20708
920.359	2.86731	0.02386		920.359	3.15376	0.07808		920.359	3.36401	0.14689		944.895	1.97448	-0.000630859		901.902	2.31886	0.0137577		343.451	1.56852	0.287386		386.81	1.50996	0.646238		860.31	2.09851	0.00045696		274.533	2.01051	0.83403						895.467	2.23565	0.00205318		921.22	3.28665	0.20326
921.168	2.8639	0.02335		921.168	3.14667	0.0757		921.168	3.35384	0.14035		945.646	1.97364	-0.000685981		902.603	2.31776	0.0137973		343.187	1.56769	0.287247		386.557	1.50806	0.645113		860.951	2.09777	0.000497249		274.301	2.00799	0.83556						896.245	2.23419	0.0020443		922.03	3.27948	0.19954
921.977	2.86052	0.02285		921.977	3.13969	0.0734		921.977	3.34378	0.13407		946.396	1.9728	-0.000740581		903.303	2.31667	0.0138362		342.923	1.56686	0.287102		386.304	1.50617	0.643968		861.592	2.09703	0.000537247		274.07	2.00546	0.83706						897.022	2.23275	0.00203487		922.84	3.27239	0.19593
922.786	2.85718	0.02236		922.786	3.13281	0.07118		922.786	3.33385	0.12803		947.147	1.97196	-0.000794653		904.004	2.31559	0.0138743		342.659	1.56605	0.286952		386.051	1.50431	0.642804		862.232	2.0963	0.000576952		273.84	2.00293	0.83854						897.8	2.23132	0.00202489		923.65	3.2654	0.19242
923.595	2.85389	0.02187		923.595	3.12605	0.06904		923.595	3.32403	0.12223		947.898	1.97113	-0.000848194		904.705	2.31451	0.0139118		342.396	1.56525	0.286797		385.798	1.50246	0.64162		862.873	2.09557	0.000616358		273.61	2.00039	0.83999						898.577	2.22991	0.00201439		924.46	3.2585	0.18901
924.404	2.85063	0.02139		924.404	3.11939	0.06697		924.404	3.31434	0.11666		948.649	1.9703	-0.000901197		905.405	2.31344	0.0139484		342.133	1.56445	0.286638		385.546	1.50063	0.640416		863.514	2.09484	0.00065546		273.38	1.99785	0.84141						899.355	2.2285	0.00200336		925.27	3.25169	0.18569
925.213	2.84741	0.02091		925.213	3.11284	0.06498		925.213	3.30478	0.1113		949.399	1.96948	-0.000953658		906.106	2.31238	0.0139844		341.87	1.56367	0.286474		385.294	1.49882	0.639194		864.154	2.09413	0.000694256		273.151	1.9953	0.84281						900.132	2.2271	0.00199181		926.08	3.24496	0.18245
926.022	2.84422	0.02044		926.022	3.10638	0.06305		926.022	3.29534	0.10616		950.15	1.96866	-0.00100557		906.807	2.31133	0.0140196		341.608	1.5629	0.286308		385.043	1.49703	0.637953		864.795	2.09341	0.000732742		272.922	1.99275	0.84418						900.91	2.22571	0.00197974		926.89	3.23832	0.17931
926.831	2.84108	0.01997		926.831	3.10003	0.06119		926.831	3.28602	0.10121		950.901	1.96785	-0.00105694		907.508	2.31029	0.0140541		341.346	1.56214	0.286139		384.792	1.49526	0.636694		865.435	2.09271	0.000770913		272.693	1.9902	0.84553						901.687	2.22434	0.00196718		927.7	3.23177	0.17624
927.64	2.83797	0.01951		927.64	3.09378	0.05938		927.64	3.27683	0.09646		951.652	1.96704	-0.00110775		908.208	2.30925	0.0140878		341.085	1.56139	0.285967		384.541	1.4935	0.635417		866.076	2.092	0.000808767		272.465	1.98764	0.84685						902.465	2.22297	0.00195411		928.51	3.2253	0.17326
928.449	2.83489	0.01905		928.449	3.08762	0.05764		928.449	3.26777	0.09188		952.402	1.96623	-0.00115801		908.909	2.30822	0.0141207		340.824	1.56065	0.285794		384.29	1.49177	0.634122		866.717	2.0913	0.000846301		272.237	1.98508	0.84814						903.242	2.22161	0.00194056		929.32	3.21891	0.17035
929.258	2.83185	0.01859		929.258	3.08156	0.05595		929.258	3.25884	0.08749		953.153	1.96543	-0.00120771		909.61	2.3072	0.014153		340.564	1.55992	0.285619		384.04	1.49006	0.632809		867.357	2.09061	0.000883511		272.01	1.98252	0.84941						904.02	2.22026	0.00192652		930.13	3.2126	0.16751
930.067	2.82884	0.01814		930.067	3.07559	0.05431		930.067	3.25003	0.08326		953.904	1.96463	-0.00125684		910.31	2.30619	0.0141844		340.304	1.55921	0.285444		383.79	1.48837	0.63148		867.998	2.08992	0.000920395		271.782	1.97995	0.85066						904.797	2.21892	0.001912		930.94	3.20637	0.16475
930.876	2.82586	0.0177		930.876	3.06971	0.05272		930.876	3.24134	0.07919		954.655	1.96383	-0.00130542		911.011	2.30519	0.0142151		340.044	1.5585	0.285269		383.541	1.48669	0.630134		868.639	2.08924	0.000956951		271.556	1.97738	0.85188						905.575	2.2176	0.00189701		931.75	3.20023	0.16205
931.685	2.82292	0.01725		931.685	3.06391	0.05118		931.685	3.23278	0.07528		955.405	1.96304	-0.00135343		911.712	2.30419	0.0142451		339.785	1.55781	0.285095		383.292	1.48504	0.628772		869.279	2.08856	0.000993176		271.329	1.97482	0.85307						906.352	2.21628	0.00188157		932.56	3.19415	0.15942
932.494	2.82001	0.01681		932.494	3.0582	0.04969		932.494	3.22434	0.07152		956.156	1.96226	-0.00140087		912.412	2.3032	0.0142743		339.526	1.55712	0.284922		383.043	1.48342	0.627394		869.92	2.08788	0.00102907		271.103	1.97225	0.85424						907.13	2.21497	0.00186567		933.37	3.18815	0.15685
933.303	2.81713	0.01637		933.303	3.05258	0.04824		933.303	3.21603	0.06789		956.907	1.96147	-0.00144774		913.113	2.30221	0.0143027		339.267	1.55645	0.284751		382.794	1.48181	0.626001		870.561	2.08721	0.00106462		270.878	1.96968	0.85538						907.907	2.21367	0.00184932		934.18	3.18223	0.15434
934.112	2.81427	0.01594		934.112	3.04704	0.04682		934.112	3.20784	0.0644		957.658	1.96069	-0.00149404		913.814	2.30124	0.0143304		339.009	1.55578	0.284582		382.546	1.48023	0.624593		871.201	2.08655	0.00109984		270.653	1.96711	0.8565						908.685	2.21238	0.00183253		934.99	3.17638	0.15189
934.921	2.81145	0.01551		934.921	3.04158	0.04545		934.921	3.19977	0.06104		958.408	1.95992	-0.00153978		914.515	2.30027	0.0143574		338.751	1.55513	0.284417		382.298	1.47867	0.62317		871.842	2.08589	0.00113472		270.428	1.96454	0.8576						909.462	2.21109	0.0018153		935.8	3.1706	0.1495
935.73	2.80866	0.01508		935.73	3.0362	0.04412		935.73	3.19181	0.05781		959.159	1.95915	-0.00158494		915.215	2.29931	0.0143835		338.494	1.55449	0.284256		382.05	1.47713	0.621734		872.482	2.08523	0.00116926		270.203	1.96197	0.85867						910.24	2.20982	0.00179765		936.61	3.16489	0.14717
936.539	2.80589	0.01465		936.539	3.03089	0.04282		936.539	3.18398	0.05469		959.91	1.95838	-0.00162953		915.916	2.29835	0.0144089		338.237	1.55385	0.284099		381.803	1.47561	0.620283		873.123	2.08458	0.00120346		269.979	1.9594	0.85972						911.017	2.20856	0.00177958		937.42	3.15925	0.14489
937.348	2.80316	0.01423		937.348	3.02566	0.04156		937.348	3.17626	0.05169		960.661	1.95761	-0.00167355		916.617	2.2974	0.0144336		337.981	1.55323	0.283948		381.556	1.47412	0.61882		873.764	2.08393	0.00123732		269.756	1.95683	0.86074						911.795	2.2073	0.0017611		938.23	3.15368	0.14266
938.157	2.80045	0.01381		938.157	3.02051	0.04033		938.157	3.16866	0.04879		961.411	1.95685	-0.001717		917.317	2.29646	0.0144575		337.725	1.55261	0.283802		381.309	1.47265	0.617344		874.404	2.08329	0.00127083		269.532	1.95426	0.86174						912.572	2.20605	0.00174221		939.04	3.14817	0.14048
938.966	2.79776	0.01339		938.966	3.01542	0.03913		938.966	3.16117	0.046		962.162	1.95609	-0.00175988		918.018	2.29552	0.0144807		337.469	1.55201	0.283664		381.063	1.47121	0.615856		875.045	2.08265	0.001304		269.309	1.9517	0.86272						913.35	2.20482	0.00172292		939.85	3.14273	0.13835
939.775	2.79511	0.01298		939.775	3.01041	0.03796		939.775	3.15379	0.04331		962.913	1.95534	-0.00180218		918.719	2.2946	0.014503		337.213	1.55141	0.283533		380.817	1.46979	0.614356		875.686	2.08201	0.00133682		269.087	1.94913	0.86367						914.127	2.20359	0.00170324		940.66	3.13735	0.13626
940.584	2.79248	0.01256		940.584	3.00547	0.03681		940.584	3.14652	0.04071		963.664	1.95459	-0.00184392		919.419	2.29367	0.0145247		336.958	1.55082	0.283411		380.571	1.46839	0.612845		876.326	2.08138	0.00136929		268.865	1.94657	0.8646						914.905	2.20237	0.00168318		941.47	3.13203	0.13422
941.393	2.78987	0.01215		941.393	3.00059	0.0357		941.393	3.13936	0.03821		964.414	1.95384	-0.00188508		920.12	2.29276	0.0145456		336.704	1.55024	0.283297		380.326	1.46702	0.611323		876.967	2.08075	0.00140141		268.643	1.94401	0.8655						915.683	2.20115	0.00166273		942.28	3.12678	0.13222
942.202	2.78729	0.01174		942.202	2.99578	0.03461		942.202	3.1323	0.03579		965.165	1.9531	-0.00192568		920.821	2.29185	0.0145657		336.45	1.54966	0.283194		380.081	1.46568	0.609791		877.608	2.08013	0.00143319		268.421	1.94146	0.86639						916.46	2.19995	0.00164191		943.09	3.12159	0.13027
943.011	2.78473	0.01134		943.011	2.99103	0.03355		943.011	3.12535	0.03345		965.916	1.95236	-0.00196571		921.522	2.29095	0.0145851		336.196	1.54909	0.283101		379.836	1.46435	0.60825		878.248	2.07951	0.00146462		268.2	1.9389	0.86725						917.238	2.19875	0.00162072		943.9	3.11646	0.12836
943.82	2.7822	0.01093		943.82	2.98634	0.03251		943.82	3.1185	0.0312		966.667	1.95163	-0.00200517		922.222	2.29005	0.0146037		335.942	1.54853	0.283019		379.592	1.46306	0.606699		878.889	2.07889	0.0014957		267.979	1.93635	0.86809						918.015	2.19756	0.00159918		944.71	3.11138	0.12648
944.629	2.77969	0.01053		944.629	2.98172	0.03149		944.629	3.11176	0.02902		967.417	1.95089	-0.00204407		922.923	2.28916	0.0146216		335.689	1.54797	0.28295		379.348	1.46179	0.60514		879.53	2.07828	0.00152643		267.759	1.93381	0.8689						918.793	2.19638	0.00157727		945.52	3.10636	0.12465
945.438	2.7772	0.01013		945.438	2.97716	0.0305		945.438	3.10511	0.02692		968.168	1.95016	-0.0020824		923.624	2.28827	0.0146388		335.436	1.54741	0.282894		379.104	1.46054	0.603573		880.17	2.07768	0.00155681		267.539	1.93127	0.8697						919.57	2.19521	0.00155502		946.33	3.1014	0.12285
946.247	2.77474	0.00973		946.247	2.97265	0.02953		946.247	3.09857	0.02488		968.919	1.94944	-0.00212017		924.324	2.28739	0.0146552		335.184	1.54686	0.282851		378.86	1.45932	0.601999		880.811	2.07707	0.00158684		267.319	1.92873	0.87047						920.348	2.19405	0.00153242		947.14	3.0965	0.12109
947.056	2.7723	0.00933		947.056	2.9682	0.02857		947.056	3.09212	0.02291		969.67	1.94872	-0.00215738		925.025	2.28652	0.0146708		334.932	1.5463	0.282822		378.617	1.45813	0.600418		881.451	2.07647	0.00161652		267.1	1.92619	0.87122						921.125	2.19289	0.00150949		947.95	3.09165	0.11937
947.865	2.76988	0.00894		947.865	2.96381	0.02764		947.865	3.08576	0.02101		970.42	1.948	-0.00219403		925.726	2.28566	0.0146857		334.681	1.54575	0.282809		378.374	1.45696	0.598831		882.092	2.07588	0.00164585		266.881	1.92366	0.87195						921.903	2.19174	0.00148622		948.76	3.08685	0.11768
948.674	2.76748	0.00855		948.674	2.95947	0.02673		948.674	3.0795	0.01917		971.171	1.94728	-0.00223012		926.426	2.28479	0.0146999		334.429	1.5452	0.282811		378.132	1.45581	0.597238		882.733	2.07528	0.00167483		266.662	1.92114	0.87266						922.68	2.1906	0.00146262		949.57	3.0821	0.11602
949.483	2.7651	0.00815		949.483	2.95519	0.02583		949.483	3.07332	0.01739		971.922	1.94657	-0.00226566		927.127	2.28394	0.0147134		334.179	1.54464	0.282829		377.89	1.4547	0.59564		883.373	2.0747	0.00170347		266.444	1.91862	0.87334						923.458	2.18947	0.0014387		950.38	3.07741	0.11439
950.292	2.76274	0.00776		950.292	2.95096	0.02495		950.292	3.06724	0.01566		972.673	1.94586	-0.00230065		927.828	2.28309	0.0147261		333.928	1.54408	0.282864		377.648	1.4536	0.594037		884.014	2.07411	0.00173175		266.226	1.91611	0.87401						924.235	2.18834	0.00141446		951.19	3.07277	0.1128
951.101	2.7604	0.00738		951.101	2.94678	0.02409		951.101	3.06125	0.01399		973.423	1.94515	-0.00233508		928.529	2.28225	0.0147381		333.678	1.54351	0.282916		377.406	1.45254	0.592431		884.655	2.07353	0.00175969		266.009	1.9136	0.87465						925.013	2.18723	0.0013899		952	3.06817	0.11124
951.91	2.75809	0.00699		951.91	2.94265	0.02324		951.91	3.05534	0.01237		974.174	1.94445	-0.00236897		929.229	2.28141	0.0147493		333.428	1.54294	0.282985		377.165	1.4515	0.590821		885.295	2.07295	0.00178728		265.792	1.91109	0.87528						925.79	2.18612	0.00136504		952.81	3.06363	0.1097
952.719	2.75579	0.00661		952.719	2.93857	0.02241		952.719	3.04951	0.0108		974.925	1.94375	-0.00240231		929.93	2.28058	0.0147599		333.179	1.54236	0.283071		376.924	1.45048	0.589208		885.936	2.07238	0.00181452		265.575	1.9086	0.87588						926.568	2.18501	0.00133987		953.62	3.05914	0.1082
953.528	2.75351	0.00622		953.528	2.93454	0.0216		953.528	3.04377	0.00928		975.676	1.94306	-0.00243511		930.631	2.27975	0.0147697		332.93	1.54176	0.283175		376.683	1.44949	0.587593		886.577	2.07181	0.00184141		265.358	1.9061	0.87647						927.345	2.18392	0.0013144		954.43	3.05469	0.10672
954.337	2.75125	0.00584		954.337	2.93056	0.0208		954.337	3.03811	0.0078		976.426	1.94236	-0.00246737		931.331	2.27893	0.0147788		332.682	1.54116	0.283296		376.443	1.44853	0.585976		887.217	2.07124	0.00186796		265.142	1.90362	0.87703						928.123	2.18283	0.00128862		955.24	3.05028	0.10527
955.146	2.74901	0.00546		955.146	2.92662	0.02001		955.146	3.03253	0.00637		977.177	1.94167	-0.00249909		932.032	2.27811	0.0147872		332.433	1.54054	0.283435		376.203	1.44759	0.584358		887.858	2.07067	0.00189417		264.926	1.90114	0.87758						928.9	2.18175	0.00126256		956.05	3.04593	0.10385
955.955	2.74679	0.00508		955.955	2.92273	0.01924		955.955	3.02703	0.00498		977.928	1.94099	-0.00253027		932.733	2.2773	0.0147948		332.186	1.5399	0.283589		375.963	1.44668	0.58274		888.498	2.07011	0.00192003		264.711	1.89867	0.87811						929.678	2.18067	0.0012362		956.86	3.04162	0.10245
956.764	2.74458	0.00471		956.764	2.91888	0.01847		956.764	3.02161	0.00363		978.679	1.9403	-0.00256093		933.433	2.2765	0.0148018		331.938	1.53924	0.28376		375.723	1.44579	0.581122		889.139	2.06956	0.00194554		264.496	1.8962	0.87861						930.455	2.17961	0.00120955		957.67	3.03735	0.10108
957.573	2.7424	0.00433		957.573	2.91508	0.01773		957.573	3.01626	0.00232		979.429	1.93962	-0.00259105		934.134	2.2757	0.0148081		331.691	1.53856	0.283946		375.484	1.44493	0.579504		889.78	2.069	0.00197071		264.281	1.89375	0.8791						931.233	2.17855	0.00118262		958.48	3.03313	0.09974
958.382	2.74023	0.00396		958.382	2.91131	0.01699		958.382	3.01099	0.00105		980.18	1.93895	-0.00262065		934.835	2.2749	0.0148136		331.444	1.53786	0.284145		375.245	1.44409	0.577887		890.42	2.06845	0.00199555		264.067	1.89129	0.87957						932.01	2.1775	0.0011554		959.29	3.02895	0.09841
959.191	2.73808	0.00359		959.191	2.90759	0.01627		959.191	3.00578	-0.000189		980.931	1.93827	-0.00264972		935.536	2.27411	0.0148185		331.198	1.53713	0.284357		375.007	1.44328	0.576272		891.061	2.0679	0.00202004		263.853	1.88885	0.88002						932.788	2.17645	0.0011279		960.1	3.02481	0.09711
960	2.73594	0.00322		960	2.90391	0.01555		960	3.00065	-0.00139		981.682	1.9376	-0.00267827		936.236	2.27332	0.0148226		330.952	1.53637	0.284579		374.769	1.44249	0.57466		891.702	2.06736	0.00204419		263.639	1.88641	0.88046						933.565	2.17541	0.00110012		960.91	3.02071	0.09584
960.809	2.73382	0.00285		960.809	2.90027	0.01485		960.809	2.99559	-0.00256		982.432	1.93693	-0.0027063		936.937	2.27254	0.0148261		330.706	1.53558	0.284811		374.531	1.44172	0.57305		892.342	2.06682	0.002068		263.426	1.88399	0.88087						934.343	2.17438	0.00107207		961.72	3.01665	0.09458
961.618	2.73172	0.00248		961.618	2.89667	0.01416		961.618	2.9906	-0.0037		983.183	1.93627	-0.00273382		937.638	2.27177	0.0148288		330.461	1.53476	0.285049		374.293	1.44098	0.571443		892.983	2.06628	0.00209148		263.213	1.88156	0.88127						935.12	2.17336	0.00104373		962.53	3.01264	0.09335
962.427	2.72963	0.00212		962.427	2.89311	0.01348		962.427	2.98568	-0.00481		983.934	1.93561	-0.00276083		938.338	2.271	0.0148309		330.216	1.53391	0.285291		374.056	1.44027	0.56984		893.624	2.06575	0.00211462		263	1.87915	0.88165						935.898	2.17234	0.00101512		963.34	3.00866	0.09214
963.236	2.72757	0.00175		963.236	2.88959	0.01281		963.236	2.98082	-0.00589		984.685	1.93495	-0.00278733		939.039	2.27023	0.0148323		329.972	1.53301	0.285534		373.819	1.43958	0.568241		894.264	2.06522	0.00213742		262.788	1.87675	0.88201						936.675	2.17133	0.000986237		964.15	3.00472	0.09095
964.045	2.72551	0.00139		964.045	2.8861	0.01215		964.045	2.97602	-0.00694		985.435	1.93429	-0.00281333		939.74	2.26947	0.0148331		329.728	1.53209	0.285775		373.582	1.43891	0.566648		894.905	2.06469	0.00215989		262.576	1.87435	0.88236						937.453	2.17033	0.000957076		964.96	3.00082	0.08978
964.854	2.72347	0.00103		964.854	2.88265	0.0115		964.854	2.97129	-0.00796		986.186	1.93364	-0.00283882		940.44	2.26872	0.0148331		329.484	1.53112	0.286011		373.345	1.43826	0.565059		895.546	2.06416	0.00218203		262.364	1.87196	0.88269						938.231	2.16933	0.000927641		965.77	2.99696	0.08862
965.663	2.72145	0.00066805		965.663	2.87923	0.01086		965.663	2.96662	-0.00896		986.937	1.93299	-0.00286382		941.141	2.26797	0.0148325		329.24	1.53011	0.286239		373.109	1.43764	0.563476		896.186	2.06364	0.00220384		262.153	1.86958	0.883						939.008	2.16834	0.00089793		966.58	2.99313	0.08749
966.472	2.71944	0.000309606		966.472	2.87585	0.01022		966.472	2.96201	-0.00994		987.688	1.93234	-0.00288832		941.842	2.26722	0.0148312		328.997	1.52906	0.286454		372.873	1.43704	0.561899		896.827	2.06312	0.00222531		261.942	1.86721	0.8833						939.786	2.16736	0.000867942		967.39	2.98934	0.08638
967.281	2.71745	-4.73923e-05		967.281	2.87251	0.0096		967.281	2.95746	-0.01089		988.438	1.9317	-0.00291233		942.543	2.26648	0.0148293		328.754	1.52798	0.286652		372.638	1.43646	0.560329		897.467	2.0626	0.00224646		261.732	1.86485	0.88358						940.563	2.16638	0.000837678		968.2	2.98559	0.08528
968.09	2.71547	-0.000402949		968.09	2.86919	0.00898		968.09	2.95297	-0.01181		989.189	1.93106	-0.00293586		943.243	2.26574	0.0148266		328.512	1.52685	0.286831		372.403	1.43591	0.558766		898.108	2.06209	0.00226729		261.521	1.8625	0.88384						941.341	2.16541	0.000807134		969.01	2.98187	0.08421
968.899	2.7135	-0.00075707		968.899	2.86591	0.00837		968.899	2.94854	-0.01272		989.94	1.93042	-0.00295889		943.944	2.26501	0.0148234		328.27	1.52569	0.286985		372.168	1.43537	0.557211		898.749	2.06158	0.00228779		261.311	1.86015	0.88409						942.118	2.16445	0.000776311		969.82	2.97818	0.08315
969.708	2.71155	-0.00111		969.708	2.86267	0.00778		969.708	2.94416	-0.0136		990.691	1.92978	-0.00298145		944.645	2.26428	0.0148195		328.028	1.52448	0.287111		371.933	1.43486	0.555663		899.389	2.06107	0.00230796		261.102	1.85782	0.88432						942.896	2.16349	0.000745204		970.63	2.97453	0.0821
970.517	2.70961	-0.00146		970.517	2.85945	0.00718		970.517	2.93984	-0.01446		991.441	1.92915	-0.00300353		945.345	2.26355	0.0148149		327.787	1.52324	0.287204		371.699	1.43437	0.554124		900.03	2.06057	0.00232781		260.893	1.85549	0.88454						943.673	2.16254	0.000713811		971.44	2.97092	0.08108
971.326	2.70769	-0.00181		971.326	2.85626	0.0066		971.326	2.93557	-0.01531		992.192	1.92852	-0.00302514		946.046	2.26284	0.0148097		327.546	1.52197	0.287262		371.465	1.4339	0.552594		900.671	2.06007	0.00234734		260.684	1.85317	0.88474						944.451	2.1616	0.00068213		972.25	2.96734	0.08007
972.135	2.70578	-0.00216		972.135	2.85311	0.00602		972.135	2.93136	-0.01613		992.943	1.92789	-0.00304627		946.747	2.26212	0.0148038		327.306	1.52067	0.287281		371.231	1.43345	0.551072		901.311	2.05957	0.00236656		260.475	1.85086	0.88493						945.228	2.16066	0.000650157		973.06	2.96379	0.07907
972.944	2.70388	-0.00251		972.944	2.84999	0.00545		972.944	2.92719	-0.01694		993.694	1.92727	-0.00306694		947.447	2.26141	0.0147973		327.065	1.51934	0.287257		370.997	1.43302	0.54956		901.952	2.05907	0.00238545		260.267	1.84857	0.8851						946.006	2.15973	0.000617887		973.87	2.96027	0.07809
973.753	2.702	-0.00285		973.753	2.84689	0.00489		973.753	2.92308	-0.01773		994.444	1.92665	-0.00308714		948.148	2.2607	0.0147902		326.825	1.51798	0.287187		370.764	1.43261	0.548058		902.593	2.05858	0.00240403		260.059	1.84628	0.88526						946.783	2.15881	0.000585315		974.68	2.95678	0.07713
974.562	2.70013	-0.0032		974.562	2.84383	0.00434		974.562	2.91902	-0.0185		995.195	1.92603	-0.00310689		948.849	2.26	0.0147825		326.586	1.5166	0.287069		370.531	1.43221	0.546566		903.233	2.05809	0.0024223		259.851	1.844	0.8854						947.561	2.15789	0.000552438		975.49	2.95333	0.07618
975.371	2.69827	-0.00354		975.371	2.84079	0.00379		975.371	2.91501	-0.01925		995.946	1.92541	-0.00312617		949.55	2.2593	0.0147741		326.347	1.51521	0.286902		370.299	1.43184	0.545084		903.874	2.0576	0.00244025		259.644	1.84173	0.88553						948.338	2.15698	0.000519248		976.3	2.9499	0.07525
976.18	2.69643	-0.00388		976.18	2.83778	0.00325		976.18	2.91105	-0.01999		996.697	1.9248	-0.00314501		950.25	2.25861	0.0147651		326.108	1.5138	0.286682		370.066	1.43148	0.543613		904.515	2.05711	0.00245789		259.437	1.83947	0.88564						949.116	2.15608	0.00048574		977.11	2.94651	0.07433
976.989	2.6946	-0.00422		976.989	2.8348	0.00271		976.989	2.90713	-0.02072		997.447	1.92419	-0.0031634		950.951	2.25792	0.0147555		325.869	1.51238	0.28641		369.834	1.43115	0.542153		905.155	2.05663	0.00247522		259.231	1.83722	0.88575						949.893	2.15519	0.000451908		977.92	2.94315	0.07343
977.798	2.69278	-0.00456		977.798	2.83185	0.00219		977.798	2.90326	-0.02143		998.198	1.92358	-0.00318134		951.652	2.25723	0.0147452		325.631	1.51096	0.286085		369.603	1.43082	0.540705		905.796	2.05615	0.00249225		259.024	1.83498	0.88584						950.671	2.1543	0.000417742		978.73	2.93981	0.07253
978.607	2.69097	-0.0049		978.607	2.82892	0.00166		978.607	2.89944	-0.02212		998.949	1.92297	-0.00319884		952.352	2.25655	0.0147344		325.393	1.50954	0.285706		369.371	1.43052	0.539267		906.436	2.05567	0.00250897		258.819	1.83275	0.88591						951.448	2.15341	0.000383237		979.54	2.93651	0.07166
979.416	2.68917	-0.00523		979.416	2.82602	0.00115		979.416	2.89566	-0.02281		999.7	1.92237	-0.0032159		953.053	2.25587	0.014723		325.156	1.50813	0.285273		369.14	1.43023	0.537842		907.077	2.0552	0.00252538		258.613	1.83053	0.88597						952.226	2.15254	0.000348382		980.35	2.93323	0.07079
980.225	2.68739	-0.00557		980.225	2.82315	0.000637		980.225	2.89192	-0.02348		1000.45	1.92177	-0.00323252		953.754	2.2552	0.0147109		324.919	1.50672	0.284789		368.909	1.42996	0.536428		907.718	2.05472	0.0025415		258.408	1.82832	0.88602						953.003	2.15167	0.000313168		981.16	2.92998	0.06994
981.034	2.68562	-0.0059		981.034	2.8203	0.000133		981.034	2.88823	-0.02413		1001.2	1.92117	-0.00324872		954.454	2.25453	0.0146983		324.682	1.50533	0.284253		368.679	1.42971	0.535027		908.358	2.05425	0.00255731		258.203	1.82612	0.88606						953.781	2.1508	0.000277585		981.97	2.92676	0.0691
981.843	2.68386	-0.00623		981.843	2.81747	-0.000366		981.843	2.88458	-0.02478		1001.95	1.92057	-0.00326448		955.155	2.25386	0.0146851		324.446	1.50395	0.283669		368.448	1.42947	0.533638		908.999	2.05379	0.00257283		257.998	1.82393	0.88608						954.558	2.14995	0.000241623		982.78	2.92357	0.06827
982.652	2.68211	-0.00656		982.652	2.81467	-0.000859		982.652	2.88097	-0.02541		1002.7	1.91998	-0.00327982		955.856	2.2532	0.0146713		324.21	1.5026	0.283037		368.218	1.42924	0.532262		909.64	2.05332	0.00258804		257.794	1.82175	0.8861						955.336	2.1491	0.000205269		983.59	2.9204	0.06746
983.461	2.68037	-0.00689		983.461	2.81189	-0.00135		983.461	2.8774	-0.02603		1003.45	1.91939	-0.00329475		956.557	2.25254	0.0146569		323.974	1.50126	0.28236		367.989	1.42903	0.530898		910.28	2.05286	0.00260297		257.59	1.81958	0.8861						956.113	2.14825	0.00016851		984.4	2.91726	0.06665
984.27	2.67864	-0.00722		984.27	2.80914	-0.00183		984.27	2.87387	-0.02664		1004.2	1.9188	-0.00330925		957.257	2.25188	0.0146419		323.739	1.49996	0.28164		367.759	1.42883	0.529547		910.921	2.0524	0.0026176		257.386	1.81742	0.88609						956.891	2.14742	0.000131335		985.21	2.91415	0.06586
985.079	2.67692	-0.00754		985.079	2.80641	-0.0023		985.079	2.87038	-0.02724		1004.95	1.91822	-0.00332334		957.958	2.25123	0.0146263		323.504	1.49868	0.280881		367.53	1.42865	0.528209		911.562	2.05194	0.00263194		257.183	1.81527	0.88606						957.668	2.14659	9.37271e-05		986.02	2.91106	0.06508
985.888	2.67522	-0.00787		985.888	2.80371	-0.00278		985.888	2.86693	-0.02784		1005.71	1.91764	-0.00333702		958.659	2.25058	0.0146102		323.269	1.49743	0.280084		367.301	1.42848	0.526884		912.202	2.05149	0.00264598		256.98	1.81313	0.88603						958.446	2.14577	5.56721e-05		986.83	2.908	0.06431
986.697	2.67353	-0.00819		986.697	2.80102	-0.00324		986.697	2.86352	-0.02842		1006.46	1.91706	-0.0033503		959.359	2.24994	0.0145935		323.035	1.49622	0.279254		367.073	1.42832	0.525573		912.843	2.05103	0.00265975		256.777	1.811	0.88598						959.224	2.14495	1.71536e-05		987.64	2.90496	0.06356
987.506	2.67184	-0.00851		987.506	2.79836	-0.0037		987.506	2.86015	-0.02899		1007.21	1.91648	-0.00336317		960.06	2.2493	0.0145763		322.801	1.49504	0.278393		366.844	1.42817	0.524275		913.483	2.05058	0.00267322		256.575	1.80889	0.88593						960.001	2.14414	-2.18461e-05		988.45	2.90195	0.06281
988.315	2.67017	-0.00883		988.315	2.79572	-0.00416		988.315	2.85681	-0.02955		1007.96	1.9159	-0.00337565		960.761	2.24866	0.0145585		322.567	1.49389	0.277504		366.616	1.42804	0.52299		914.124	2.05013	0.00268641		256.373	1.80678	0.88586						960.779	2.14334	-6.13454e-05		989.26	2.89897	0.06207
989.124	2.66851	-0.00915		989.124	2.79311	-0.00461		989.124	2.85351	-0.0301		1008.71	1.91533	-0.00338772		961.461	2.24803	0.0145401		322.334	1.49278	0.276589		366.389	1.42791	0.521718		914.765	2.04969	0.00269932		256.171	1.80468	0.88578						961.556	2.14255	-0.000101364		990.07	2.89601	0.06134
989.933	2.66685	-0.00947		989.933	2.79051	-0.00506		989.933	2.85024	-0.03065		1009.46	1.91476	-0.00339941		962.162	2.2474	0.0145212		322.101	1.49171	0.275653		366.161	1.4278	0.52046		915.405	2.04924	0.00271195		255.97	1.8026	0.88569						962.334	2.14176	-0.000141923		990.88	2.89307	0.06063
990.742	2.66521	-0.00979		990.742	2.78794	-0.0055		990.742	2.84701	-0.03118		1010.21	1.91419	-0.00341071		962.863	2.24677	0.0145017		321.868	1.49067	0.274698		365.934	1.4277	0.519216		916.046	2.0488	0.0027243		255.769	1.80052	0.88559						963.111	2.14098	-0.000183045		991.69	2.89015	0.05992
991.551	2.66358	-0.0101		991.551	2.78538	-0.00594		991.551	2.84381	-0.03171		1010.96	1.91363	-0.00342162		963.564	2.24615	0.0144817		321.636	1.48967	0.273725		365.707	1.42761	0.517985		916.687	2.04836	0.00273638		255.568	1.79846	0.88548						963.889	2.14021	-0.000224754		992.5	2.88726	0.05923
992.36	2.66196	-0.01042		992.36	2.78285	-0.00637		992.36	2.84064	-0.03223		1011.71	1.91306	-0.00343215		964.264	2.24553	0.0144612		321.404	1.48871	0.272739		365.481	1.42753	0.516768		917.327	2.04793	0.00274818		255.367	1.7964	0.88536						964.666	2.13944	-0.000267074		993.31	2.88439	0.05854
993.169	2.66034	-0.01073		993.169	2.78034	-0.0068		993.169	2.83751	-0.03275		1012.46	1.9125	-0.0034423		964.965	2.24491	0.0144401		321.172	1.48778	0.271741		365.254	1.42745	0.515564		917.968	2.04749	0.00275971		255.167	1.79436	0.88523						965.444	2.13868	-0.000310033		994.12	2.88155	0.05786
993.978	2.65874	-0.01104		993.978	2.77784	-0.00722		993.978	2.83441	-0.03325		1013.21	1.91194	-0.00345208		965.666	2.2443	0.0144185		320.941	1.48689	0.270733		365.028	1.42739	0.514374		918.609	2.04706	0.00277096		254.967	1.79232	0.88509						966.221	2.13793	-0.000353659		994.93	2.87873	0.05719
994.787	2.65715	-0.01135		994.787	2.77537	-0.00764		994.787	2.83134	-0.03375		1013.96	1.91139	-0.00346149		966.366	2.24369	0.0143964		320.71	1.48603	0.269719		364.803	1.42733	0.513198		919.249	2.04663	0.00278195		254.768	1.7903	0.88495						966.999	2.13719	-0.000397983		995.74	2.87593	0.05653
995.596	2.65556	-0.01166		995.596	2.77291	-0.00805		995.596	2.82831	-0.03424		1014.71	1.91083	-0.00347053		967.067	2.24309	0.0143737		320.479	1.48521	0.268699		364.577	1.42728	0.512035		919.89	2.0462	0.00279267		254.569	1.78829	0.88479						967.776	2.13645	-0.000443036		996.55	2.87315	0.05588
996.405	2.65399	-0.01196		996.405	2.77048	-0.00847		996.405	2.8253	-0.03473		1015.47	1.91028	-0.0034792		967.768	2.24248	0.0143505		320.249	1.48442	0.267675		364.352	1.42724	0.510886		920.531	2.04578	0.00280313		254.37	1.78629	0.88462						968.554	2.13573	-0.000488854		997.36	2.87039	0.05524
997.214	2.65242	-0.01227		997.214	2.76806	-0.00887		997.214	2.82232	-0.03521		1016.22	1.90973	-0.00348751		968.468	2.24188	0.0143268		320.019	1.48366	0.266649		364.127	1.42721	0.50975		921.171	2.04535	0.00281332		254.171	1.7843	0.88445						969.331	2.13501	-0.000535471		998.17	2.86765	0.05461
998.023	2.65086	-0.01257		998.023	2.76566	-0.00927		998.023	2.81938	-0.03568		1016.97	1.90918	-0.00349547		969.169	2.24129	0.0143027		319.789	1.48293	0.265623		363.902	1.42719	0.508627		921.812	2.04493	0.00282325		253.973	1.78232	0.88426						970.109	2.13429	-0.000582927		998.98	2.86494	0.05398
998.832	2.64932	-0.01288		998.832	2.76328	-0.00967		998.832	2.81646	-0.03615		1017.72	1.90864	-0.00350307		969.87	2.24069	0.014278		319.56	1.48224	0.264598		363.678	1.42717	0.507518		922.452	2.04451	0.00283293		253.775	1.78035	0.88407						970.886	2.13359	-0.000631263		999.79	2.86225	0.05337
999.641	2.64778	-0.01318		999.641	2.76092	-0.01007		999.641	2.81357	-0.03661		1018.47	1.9081	-0.00351032		970.571	2.2401	0.0142528		319.331	1.48157	0.263574		363.454	1.42715	0.506422		923.093	2.04409	0.00284234		253.577	1.77839	0.88387						971.664	2.13289	-0.000680523		1000.6	2.85957	0.05276
1000.45	2.64625	-0.01348		1000.45	2.75857	-0.01046		1000.45	2.81071	-0.03706		1019.22	1.90756	-0.00351722		971.271	2.23952	0.0142271		319.102	1.48093	0.262554		363.23	1.42715	0.505339		923.734	2.04368	0.0028515		253.38	1.77644	0.88366						972.441	2.13221	-0.000730752		1001.41	2.85692	0.05216
1001.26	2.64473	-0.01378		1001.26	2.75625	-0.01085		1001.26	2.80788	-0.03751		1019.97	1.90702	-0.00352378		971.972	2.23893	0.0142009		318.874	1.48031	0.261538		363.007	1.42715	0.50427		924.374	2.04327	0.0028604		253.183	1.7745	0.88344						973.219	2.13153	-0.000782001		1002.22	2.85429	0.05157
1002.07	2.64321	-0.01407		1002.07	2.75394	-0.01123		1002.07	2.80507	-0.03796		1020.72	1.90648	-0.00353		972.673	2.23835	0.0141742		318.646	1.47972	0.260527		362.783	1.42715	0.503213		925.015	2.04285	0.00286906		252.986	1.77258	0.88322						973.996	2.13086	-0.000834321		1003.03	2.85168	0.05098
1002.88	2.64171	-0.01437		1002.88	2.75164	-0.01161		1002.88	2.80229	-0.0384		1021.47	1.90595	-0.00353588		973.373	2.23777	0.014147		318.418	1.47916	0.259521		362.56	1.42716	0.502169		925.656	2.04244	0.00287746		252.79	1.77066	0.88298						974.774	2.1302	-0.000887769		1003.84	2.84908	0.05041
1003.69	2.64021	-0.01466		1003.69	2.74937	-0.01198		1003.69	2.79954	-0.03883		1022.22	1.90542	-0.00354143		974.074	2.2372	0.0141194		318.19	1.47862	0.258522		362.338	1.42717	0.501138		926.296	2.04204	0.00288561		252.593	1.76875	0.88274						975.551	2.12954	-0.000942404		1004.65	2.84651	0.04984
1004.5	2.63873	-0.01496		1004.5	2.74711	-0.01235		1004.5	2.79681	-0.03926		1022.97	1.90489	-0.00354664		974.775	2.23663	0.0140912		317.963	1.4781	0.25753		362.115	1.42719	0.50012		926.937	2.04163	0.00289352		252.398	1.76686	0.88249						976.329	2.1289	-0.00099829		1005.46	2.84395	0.04927
1005.3	2.63725	-0.01525		1005.3	2.74486	-0.01272		1005.3	2.79411	-0.03969		1023.72	1.90436	-0.00355153		975.475	2.23606	0.0140626		317.737	1.4776	0.256544		361.893	1.42721	0.499114		927.578	2.04123	0.00290119		252.202	1.76497	0.88224						977.106	2.12827	-0.00105549		1006.27	2.84142	0.04872
1006.11	2.63578	-0.01554		1006.11	2.74264	-0.01309		1006.11	2.79144	-0.04011		1024.47	1.90384	-0.00355609		976.176	2.23549	0.0140336		317.51	1.47713	0.255567		361.671	1.42724	0.498121		928.218	2.04083	0.00290861		252.007	1.7631	0.88197						977.884	2.12764	-0.00111409		1007.08	2.8389	0.04817
1006.92	2.63432	-0.01583		1006.92	2.74042	-0.01345		1006.92	2.78879	-0.04052		1025.23	1.90331	-0.00356033		976.877	2.23493	0.014004		317.284	1.47667	0.254597		361.45	1.42726	0.49714		928.859	2.04043	0.00291579		251.812	1.76124	0.8817						978.661	2.12703	-0.00117415		1007.89	2.8364	0.04763
1007.73	2.63286	-0.01612		1007.73	2.73823	-0.01381		1007.73	2.78616	-0.04093		1025.98	1.90279	-0.00356425		977.578	2.23437	0.013974		317.058	1.47623	0.253636		361.228	1.4273	0.496171		929.499	2.04003	0.00292273		251.617	1.75938	0.88143						979.439	2.12642	-0.00123576		1008.7	2.83392	0.0471
1008.54	2.63142	-0.01641		1008.54	2.73605	-0.01416		1008.54	2.78356	-0.04134		1026.73	1.90228	-0.00356786		978.278	2.23381	0.0139436		316.833	1.47581	0.252683		361.007	1.42733	0.495214		930.14	2.03963	0.00292943		251.423	1.75754	0.88114						980.217	2.12583	-0.00129901		1009.51	2.83146	0.04657
1009.35	2.62998	-0.01669		1009.35	2.73388	-0.01451		1009.35	2.78098	-0.04175		1027.48	1.90176	-0.00357115		978.979	2.23326	0.0139127		316.608	1.4754	0.251739		360.786	1.42737	0.494268		930.781	2.03924	0.0029359		251.229	1.75571	0.88085						980.994	2.12525	-0.001364		1010.32	2.82902	0.04605
1010.16	2.62855	-0.01698		1010.16	2.73173	-0.01486		1010.16	2.77842	-0.04214		1028.23	1.90125	-0.00357414		979.68	2.23271	0.0138813		316.383	1.47501	0.250804		360.566	1.42741	0.493335		931.421	2.03885	0.00294214		251.035	1.75389	0.88056						981.772	2.12467	-0.00143081		1011.13	2.82659	0.04553
1010.97	2.62712	-0.01726		1010.97	2.7296	-0.0152		1010.97	2.77589	-0.04254		1028.98	1.90073	-0.00357682		980.38	2.23216	0.0138495		316.159	1.47464	0.249877		360.346	1.42745	0.492413		932.062	2.03846	0.00294814		250.842	1.75207	0.88025						982.549	2.12411	-0.00149957		1011.94	2.82418	0.04502
1011.78	2.62571	-0.01754		1011.78	2.72748	-0.01554		1011.78	2.77338	-0.04293		1029.73	1.90022	-0.0035792		981.081	2.23161	0.0138173		315.934	1.47428	0.248959		360.126	1.42749	0.491503		932.703	2.03807	0.00295392		250.649	1.75027	0.87994						983.327	2.12356	-0.00157039		1012.75	2.82179	0.04452
1012.59	2.6243	-0.01782		1012.59	2.72538	-0.01588		1012.59	2.77089	-0.04332		1030.48	1.89971	-0.00358127		981.782	2.23107	0.0137846		315.711	1.47394	0.248051		359.906	1.42754	0.490603		933.343	2.03768	0.00295947		250.456	1.74848	0.87963						984.104	2.12303	-0.00164338		1013.56	2.81941	0.04403
1013.39	2.6229	-0.0181		1013.39	2.72328	-0.01622		1013.39	2.76842	-0.0437		1031.23	1.89921	-0.00358305		982.482	2.23053	0.0137515		315.487	1.47361	0.247151		359.686	1.42758	0.489715		933.984	2.0373	0.00296479		250.263	1.7467	0.87931						984.882	2.1225	-0.0017187		1014.37	2.81705	0.04354
1014.2	2.62151	-0.01838		1014.2	2.72121	-0.01655		1014.2	2.76598	-0.04408		1031.98	1.8987	-0.00358454		983.183	2.22999	0.0137179		315.264	1.47329	0.24626		359.467	1.42763	0.488838		934.625	2.03692	0.00296988		250.071	1.74493	0.87898						985.659	2.12199	-0.00179647		1015.18	2.81471	0.04305
1015.01	2.62012	-0.01865		1015.01	2.71915	-0.01688		1015.01	2.76355	-0.04446		1032.73	1.8982	-0.00358573		983.884	2.22946	0.0136839		315.041	1.47298	0.245378		359.248	1.42768	0.487971		935.265	2.03653	0.00297476		249.879	1.74317	0.87865						986.437	2.12149	-0.00187686		1015.99	2.81239	0.04258
1015.82	2.61874	-0.01893		1015.82	2.7171	-0.0172		1015.82	2.76115	-0.04484		1033.48	1.8977	-0.00358664		984.585	2.22892	0.0136495		314.818	1.47268	0.244504		359.03	1.42773	0.487115		935.906	2.03616	0.00297941		249.688	1.74142	0.87831						987.214	2.12101	-0.00196003		1016.8	2.81008	0.0421
1016.63	2.61737	-0.0192		1016.63	2.71506	-0.01752		1016.63	2.75877	-0.04521		1034.23	1.89721	-0.00358726		985.285	2.22839	0.0136147		314.596	1.4724	0.24364		358.811	1.42778	0.48627		936.547	2.03578	0.00298385		249.496	1.73968	0.87796						987.992	2.12053	-0.00204617		1017.61	2.80779	0.04164
1017.44	2.61601	-0.01948		1017.44	2.71304	-0.01784		1017.44	2.7564	-0.04557		1034.98	1.89671	-0.0035876		985.986	2.22787	0.0135795		314.374	1.47212	0.242783		358.593	1.42783	0.485434		937.187	2.0354	0.00298807		249.305	1.73796	0.87761						988.769	2.12008	-0.00213546		1018.42	2.80551	0.04118
1018.25	2.61465	-0.01975		1018.25	2.71103	-0.01816		1018.25	2.75406	-0.04594		1035.74	1.89622	-0.00358766		986.687	2.22734	0.0135438		314.153	1.47186	0.241936		358.375	1.42788	0.484609		937.828	2.03503	0.00299207		249.114	1.73624	0.87726						989.547	2.11964	-0.00222812		1019.23	2.80325	0.04072
1019.06	2.6133	-0.02002		1019.06	2.70904	-0.01847		1019.06	2.75174	-0.0463		1036.49	1.89572	-0.00358745		987.387	2.22682	0.0135078		313.931	1.4716	0.241097		358.158	1.42793	0.483793		938.468	2.03465	0.00299586		248.924	1.73453	0.8769						990.324	2.11921	-0.00232438		1020.04	2.801	0.04027
1019.87	2.61196	-0.02029		1019.87	2.70706	-0.01878		1019.87	2.74943	-0.04666		1037.24	1.89523	-0.00358696		988.088	2.2263	0.0134713		313.71	1.47136	0.240266		357.94	1.42799	0.482988		939.109	2.03428	0.00299944		248.734	1.73283	0.87654						991.102	2.1188	-0.00242448		1020.85	2.79877	0.03983
1020.67	2.61063	-0.02055		1020.67	2.70509	-0.01909		1020.67	2.74715	-0.04701		1037.99	1.89474	-0.0035862		988.789	2.22578	0.0134344		313.489	1.47112	0.239443		357.723	1.42804	0.482191		939.75	2.03392	0.0030028		248.544	1.73114	0.87617						991.879	2.11841	-0.0025287		1021.66	2.79656	0.03939
1021.48	2.6093	-0.02082		1021.48	2.70314	-0.0194		1021.48	2.74488	-0.04737		1038.74	1.89426	-0.00358517		989.489	2.22527	0.0133972		313.269	1.47089	0.238628		357.506	1.42809	0.481404		940.39	2.03355	0.00300596		248.354	1.72946	0.87579						992.657	2.11804	-0.00263734		1022.47	2.79436	0.03896
1022.29	2.60798	-0.02109		1022.29	2.70119	-0.0197		1022.29	2.74263	-0.04772		1039.49	1.89377	-0.00358388		990.19	2.22475	0.0133595		313.049	1.47067	0.237822		357.29	1.42814	0.480627		941.031	2.03318	0.00300892		248.165	1.72779	0.87542						993.434	2.11768	-0.0027507		1023.28	2.79217	0.03853
1023.1	2.60666	-0.02135		1023.1	2.69926	-0.02		1023.1	2.7404	-0.04807		1040.24	1.89329	-0.00358232		990.891	2.22425	0.0133215		312.829	1.47045	0.237022		357.074	1.42819	0.479858		941.672	2.03282	0.00301167		247.976	1.72614	0.87503						994.212	2.11735	-0.00286914		1024.09	2.79	0.03811
1023.91	2.60535	-0.02161		1023.91	2.69735	-0.0203		1023.91	2.73819	-0.04841		1040.99	1.89281	-0.00358051		991.592	2.22374	0.013283		312.61	1.47025	0.236231		356.858	1.42824	0.479098		942.312	2.03246	0.00301421		247.787	1.72449	0.87465						994.989	2.11704	-0.00299304		1024.9	2.78785	0.03769
1024.72	2.60405	-0.02187		1024.72	2.69544	-0.02059		1024.72	2.736	-0.04875		1041.74	1.89233	-0.00357844		992.292	2.22323	0.0132442		312.391	1.47005	0.235447		356.642	1.42828	0.478347		942.953	2.03209	0.00301655		247.599	1.72285	0.87425						995.767	2.11675	-0.00312282		1025.71	2.78571	0.03727
1025.53	2.60275	-0.02213		1025.53	2.69355	-0.02088		1025.53	2.73382	-0.04909		1042.49	1.89186	-0.00357611		992.993	2.22273	0.013205		312.172	1.46985	0.234671		356.426	1.42833	0.477604		943.594	2.03174	0.0030187		247.411	1.72122	0.87386						996.544	2.11648	-0.00325894		1026.52	2.78358	0.03686
1026.34	2.60146	-0.02239		1026.34	2.69167	-0.02117		1026.34	2.73166	-0.04943		1043.24	1.89138	-0.00357353		993.694	2.22223	0.0131655		311.953	1.46967	0.233902		356.211	1.42838	0.47687		944.234	2.03138	0.00302065		247.223	1.7196	0.87346						997.322	2.11623	-0.00340191		1027.33	2.78147	0.03646
1027.15	2.60018	-0.02265		1027.15	2.6898	-0.02146		1027.15	2.72952	-0.04976		1043.99	1.89091	-0.00357071		994.394	2.22173	0.0131255		311.735	1.46949	0.233139		355.996	1.42842	0.476143		944.875	2.03102	0.0030224		247.035	1.71799	0.87306						998.099	2.11602	-0.00355228		1028.14	2.77937	0.03606
1027.96	2.59891	-0.02291		1027.96	2.68794	-0.02174		1027.96	2.72739	-0.0501		1044.74	1.89044	-0.00356763		995.095	2.22124	0.0130852		311.517	1.46931	0.232384		355.781	1.42846	0.475425		945.516	2.03067	0.00302395		246.848	1.71639	0.87265						998.877	2.11582	-0.00371066		1028.95	2.77728	0.03567
1028.77	2.59764	-0.02316		1028.77	2.68609	-0.02202		1028.77	2.72528	-0.05043		1045.5	1.88997	-0.00356432		995.796	2.22074	0.0130445		311.299	1.46914	0.231636		355.567	1.42851	0.474714		946.156	2.03031	0.00302531		246.661	1.7148	0.87224						999.654	2.11566	-0.00387775		1029.76	2.77521	0.03527
1029.57	2.59637	-0.02342		1029.57	2.68426	-0.0223		1029.57	2.72319	-0.05076		1046.25	1.8895	-0.00356076		996.496	2.22025	0.0130035		311.082	1.46898	0.230894		355.353	1.42855	0.474011		946.797	2.02996	0.00302649		246.474	1.71322	0.87182						1000.43	2.11553	-0.00405429		1030.57	2.77315	0.03489
1030.38	2.59511	-0.02367		1030.38	2.68244	-0.02257		1030.38	2.72112	-0.05108		1047	1.88903	-0.00355696		997.197	2.21976	0.0129621		310.865	1.46882	0.230159		355.139	1.42859	0.473316		947.437	2.02961	0.00302747		246.288	1.71165	0.87141						1001.21	2.11543	-0.00424112		1031.38	2.77111	0.03451
1031.19	2.59386	-0.02392		1031.19	2.68062	-0.02285		1031.19	2.71905	-0.0514		1047.75	1.88857	-0.00355293		997.898	2.21928	0.0129203		310.648	1.46867	0.229431		354.925	1.42862	0.472627		948.078	2.02926	0.00302826		246.101	1.71009	0.87099						1001.99	2.11537	-0.00443919		1032.19	2.76908	0.03413
1032	2.59262	-0.02417		1032	2.67882	-0.02312		1032	2.71701	-0.05173		1048.5	1.88811	-0.00354867		998.599	2.21879	0.0128782		310.432	1.46852	0.228709		354.712	1.42866	0.471946		948.719	2.02892	0.00302887		245.916	1.70854	0.87056						1002.76	2.11534	-0.00464953		1033	2.76706	0.03376
1032.81	2.59138	-0.02442		1032.81	2.67703	-0.02339		1032.81	2.71498	-0.05205		1049.25	1.88765	-0.00354417		999.299	2.21831	0.0128357		310.216	1.46838	0.227993		354.499	1.42869	0.471272		949.359	2.02857	0.00302929		245.73	1.707	0.87013						1003.54	2.11536	-0.00487333		1033.81	2.76506	0.03339
1033.62	2.59015	-0.02467		1033.62	2.67525	-0.02365		1033.62	2.71296	-0.05236		1050	1.88719	-0.00353945		1000	2.21783	0.0127929		310	1.46824	0.227283		354.286	1.42872	0.470605		950	2.02823	0.00302953		245.545	1.70546	0.8697						1004.32	2.11541	-0.00511191		1034.62	2.76307	0.03302
																																								1005.1	2.11551	-0.00536675
																																								1005.87	2.11566	-0.00563955
																																								1006.65	2.11587	-0.00593221
																																								1007.43	2.11613	-0.00624693
																																								1008.21	2.11645	-0.00658619
																																								1008.98	2.11684	-0.00695289
																																								1009.76	2.11731	-0.00735032
																																								1010.54	2.11786	-0.00778233
																																								1011.32	2.11849	-0.0082534
																																								1012.09	2.11922	-0.00876878
																																								1012.87	2.12007	-0.00933465
																																								1013.65	2.12103	-0.00995833
																																								1014.43	2.12212	-0.0106485
																																								1015.2	2.12337	-0.0114158
																																								1015.98	2.12478	-0.0122728
																																								1016.76	2.12638	-0.013235
																																								1017.54	2.12819	-0.0143214
																																								1018.31	2.13024	-0.0155558
																																								1019.09	2.13258	-0.0169678
																																								1019.87	2.13523	-0.0185951
																																								1020.65	2.13825	-0.0204861
																																								1021.42	2.14171	-0.0227039
																																								1022.2	2.14566	-0.0253319
																																								1022.98	2.15022	-0.028482

## Sheet: Fig 1d
Material	No. of pi electrons	ed_tddft (M^-1 cm^-1)	reference	ed_sol (M^-1 cm^-1)	reference
Y5	66	163957	This work	126425	this work
Y6	66	164080	This work	140061	this work
Y7	66	167004	This work	146610	this work
O-IDFBR	58	116649	This work	76000	https://www.nature.com/articles/nmat4797
O-IDTBR	58	172830	This work	100000	https://www.nature.com/articles/nmat4797
ITIC	58	193284	This work	130000	https://www.mdpi.com/1422-0067/21/21/8085
IT-4F	58	192189	This work	116000	https://www.mdpi.com/1422-0067/21/21/8085
ITIC	58	193284	This work	210000	https://www.nature.com/articles/s41563-020-00835-x
IT-4F	58	192189	This work	190000	https://www.nature.com/articles/s41563-020-00835-x
IEICO-4F	62	205364	This work	170000	https://www.nature.com/articles/s41563-020-00835-x
O-IDTBR	58	172830	This work	110000	https://www.nature.com/articles/s41563-020-00835-x
IEICO-4F	62	205364	This work	226000	https://doi.org/10.1021/acsenergylett.8b00627
IDIC	50	183172	This work	240000	https://www.mdpi.com/1422-0067/21/21/8085
PC61BM	60	444	This work	3900	https://www.nature.com/articles/ncomms11585
PC71BM	70	61.24	This work	26806	https://onlinelibrary.wiley.com/doi/pdf/10.1002/anie.200351647
FBR	52	115179	This work	54000	https://www.nature.com/articles/nmat4797
DITCF	56	166001	This work	93000	https://pubs.rsc.org/en/content/articlepdf/2016/ta/c6ta04358e
FDITCF	56	206880	This work	270000	https://onlinelibrary.wiley.com/doi/full/10.1002/adma.201604964
IEICO	62	204369	This work	160000	https://doi.org/10.1021/acsami.9b03499
IEICO	62	204369	This work	130000	https://www.nature.com/articles/s41563-020-00835-x
IDT-TFBT	38	85140.2	This work	68000	https://onlinelibrary.wiley.com/doi/10.1002/anie.202013625
IDT-TCNBT	50	98728.1	This work	105000	https://onlinelibrary.wiley.com/doi/10.1002/anie.202013626
IDT-TCV2	34	106544	This work	196000	https://onlinelibrary.wiley.com/doi/10.1002/anie.202013627
IDT-RCN	66	184557	This work	120000	https://onlinelibrary.wiley.com/doi/10.1002/anie.202013628
IDTT-2BM	50	147790	This work	120000	https://onlinelibrary.wiley.com/doi/10.1002/anie.202013629
a1	66	195887	This work	114000	https://www.mdpi.com/1422-0067/21/21/8085
a2	58	153194	This work	100000	https://www.mdpi.com/1422-0067/21/21/8085
a3	74	195443	This work	88000	https://www.mdpi.com/1422-0067/21/21/8085
a4	66	201161	This work	210000	https://www.mdpi.com/1422-0067/21/21/8085
a6	54	160107	This work	180000	https://www.mdpi.com/1422-0067/21/21/8085
a8	60	149405	This work	220000	https://www.mdpi.com/1422-0067/21/21/8085
a10	66	235938	This work	351000	https://www.mdpi.com/1422-0067/21/21/8085
a13	62	201368	This work	99000	https://www.mdpi.com/1422-0067/21/21/8086
a14	62	213226	This work	132000	https://www.mdpi.com/1422-0067/21/21/8085
b3	58	200756	This work	140000	https://www.mdpi.com/1422-0067/21/21/8085
b4	58	195175	This work	190000	https://www.mdpi.com/1422-0067/21/21/8085
b5	58	199791	This work	210000	https://www.mdpi.com/1422-0067/21/21/8085
b6	58	198421	This work	230000	https://www.mdpi.com/1422-0067/21/21/8085
b7	50	214527	This work	260000	https://www.mdpi.com/1422-0067/21/21/8085
b8	66	118800	This work	150000	https://www.mdpi.com/1422-0067/21/21/8085
b9	62	213448	This work	230000	https://www.mdpi.com/1422-0067/21/21/8085
b11	66	207614	This work	230000	https://www.mdpi.com/1422-0067/21/21/8085
b12	58	194134	This work	214000	https://www.mdpi.com/1422-0067/21/21/8085
C#Cc1cccc2c1cccc2C#Cc1cccc2c1cccc2C#Cc1cccc2c1cccc2N(C)C	N/A	124019	https://doi.org/10.1038/s41597-019-0306-0	26600	https://doi.org/10.1038/s41597-019-0306-0
COc1ccc(s1)C#Cc1sc(c(c1[N+](=O)[O-])[N+](=O)[O-])C#Cc1ccc(s1)OC	N/A	98842.2	https://doi.org/10.1038/s41597-019-0306-0	9700	https://doi.org/10.1038/s41597-019-0306-0
CCOC(=O)c1cc2c(n1Cc1ccc(cc1)C)c1[nH]c(=O)c(cc1CC2)S(=O)(=O)c1ccccc1	N/A	49207.8	https://doi.org/10.1038/s41597-019-0306-0	37088	https://doi.org/10.1038/s41597-019-0306-0
COc1ccc(cc1)c1cnc(n1C)c1ccc(cc1)c1nc2c(s1)cc(cc2)C=O	N/A	133751	https://doi.org/10.1038/s41597-019-0306-0	19000	https://doi.org/10.1038/s41597-019-0306-0
c1ccc2c(c1)n(c1ccc(cc1)C#Cc1ccc(cc1)n1c3ccccc3c3c1cccc3)c1c2cccc1	N/A	134136	https://doi.org/10.1038/s41597-019-0306-0	33800	https://doi.org/10.1038/s41597-019-0306-0
CN(c1ccc(cc1)C=Nc1nc(C#N)c(nc1C#N)N=Cc1ccc(cc1)N(C)C)C	N/A	164114	https://doi.org/10.1038/s41597-019-0306-0	67300	https://doi.org/10.1038/s41597-019-0306-0
N#Cc1cc(sc1c1sc(cc1C#N)c1cccc(c1)C(F)(F)F)c1cccc(c1)C(F)(F)F	N/A	66577.4	https://doi.org/10.1038/s41597-019-0306-0	13182.6	https://doi.org/10.1038/s41597-019-0306-0
CCN(c1ccc(cc1)C=CC(=O)O)CC	N/A	69801.4	https://doi.org/10.1038/s41597-019-0306-0	35550	https://doi.org/10.1038/s41597-019-0306-0
CCOC(=O)c1cc2c(n1Cc1ccc(cc1)OC)c1[nH]c(=O)c(cc1CC2)S(=O)(=O)c1ccccc1	N/A	49148.9	https://doi.org/10.1038/s41597-019-0306-0	35577	https://doi.org/10.1038/s41597-019-0306-0
c1ccc(nc1)c1cccc(c1)c1ccc2c(c1)Cc1c2ccc(c1)c1nc2c(s1)cccc2	N/A	132070	https://doi.org/10.1038/s41597-019-0306-0	88200	https://doi.org/10.1038/s41597-019-0306-0
CC(c1ccc(cc1)c1nc2c(o1)cccc2)(C)C	N/A	73486.1	https://doi.org/10.1038/s41597-019-0306-0	30600	https://doi.org/10.1038/s41597-019-0306-0
CC(c1ccc(cc1)c1ccc(cc1)c1[nH]c(=O)c2c1c(=O)[nH]c2c1ccc(cc1)c1ccc(cc1)C(C)(C)C)(C)C	N/A	81557.9	https://doi.org/10.1038/s41597-019-0306-0	47600	https://doi.org/10.1038/s41597-019-0306-0
n1ccc(cc1)C=Cc1nc2c([nH]1)cccc2	N/A	89205.2	https://doi.org/10.1038/s41597-019-0306-0	30700	https://doi.org/10.1038/s41597-019-0306-0
N#Cc1ccc(cc1)C#Cc1cc2c(n1C)cccc2	N/A	102039	https://doi.org/10.1038/s41597-019-0306-0	28600	https://doi.org/10.1038/s41597-019-0306-0
C#Cc1ccc2c(c1)Cc1c2ccc(c1)C#C	N/A	82618.3	https://doi.org/10.1038/s41597-019-0306-0	43408	https://doi.org/10.1038/s41597-019-0306-0
c1ccc2c(c1)c1ccc(cc1C2)C#Cc1ccc(cc1)n1c2ccccc2c2c1cccc2	N/A	87172.1	https://doi.org/10.1038/s41597-019-0306-0	44200	https://doi.org/10.1038/s41597-019-0306-0
COc1ccc(cc1)n1c(nc2c1c1ccccc1c1c2cccc1)c1ccc(cc1)c1cncc2c1cccc2	N/A	67706.8	https://doi.org/10.1038/s41597-019-0306-0	32300	https://doi.org/10.1038/s41597-019-0306-0
n1ccc(nc1)c1ccc(s1)c1ccc(cc1)c1ccc(cc1)n1c2ccccc2c2c1cccc2	N/A	119406	https://doi.org/10.1038/s41597-019-0306-0	233000	https://doi.org/10.1038/s41597-019-0306-0
N#CC(=Cc1ccc(cc1)N(c1ccc(cc1)C#Cc1ccccn1)c1ccc(cc1)C#Cc1ccccn1)C(=O)O	N/A	96759.5	https://doi.org/10.1038/s41597-019-0306-0	94000	https://doi.org/10.1038/s41597-019-0306-0
CCN(c1nc(c(s1)N=Nc1nc2c(s1)cccc2)c1sc(nc1N)N(CC)CC)CC	N/A	59174.3	https://doi.org/10.1038/s41597-019-0306-0	24100	https://doi.org/10.1038/s41597-019-0306-0
CCOC(=O)C=Cc1cc2ccc(cc2oc1=O)C#C	N/A	68385.6	https://doi.org/10.1038/s41597-019-0306-0	6500	https://doi.org/10.1038/s41597-019-0306-0
CCOC(=O)C=Cc1cc2ccc(cc2oc1=O)O	N/A	56798.6	https://doi.org/10.1038/s41597-019-0306-0	5900	https://doi.org/10.1038/s41597-019-0306-0
N#CC(=Cc1ccc(s1)c1ccc(c2c1nsn2)c1ccc(cc1)n1c2ccccc2c2c1cccc2)C(=O)O	N/A	99326.9	https://doi.org/10.1038/s41597-019-0306-0	23993	https://doi.org/10.1038/s41597-019-0306-0
CC(c1ccc(cc1)c1nc2c(o1)cc(cc2)c1ccc2c(c1)oc(n2)c1ccc(cc1)C(C)(C)C)(C)C	N/A	155276	https://doi.org/10.1038/s41597-019-0306-0	63400	https://doi.org/10.1038/s41597-019-0306-0
N#CC(=C1C(=C1)C=Cc1ccc(c(c1)OC)O)C#N	N/A	57927	https://doi.org/10.1038/s41597-019-0306-0	26000	https://doi.org/10.1038/s41597-019-0306-0
COc1ccc(cc1)C=c1oc(=Cc2ccc(cc2)N(C)C)c2c1cc(OC)c(c2)OC	N/A	51703.1	https://doi.org/10.1038/s41597-019-0306-0	27100	https://doi.org/10.1038/s41597-019-0306-0
CN(c1ccc(cc1)C=Cc1ccncc1)C	N/A	86612.7	https://doi.org/10.1038/s41597-019-0306-0	36084	https://doi.org/10.1038/s41597-019-0306-0
N#CC(=Cc1ccc(cc1)c1ccc(s1)c1ccc2c3c1ccc1c3c(cc2)ccc1)C(=O)O	N/A	138383	https://doi.org/10.1038/s41597-019-0306-0	42500	https://doi.org/10.1038/s41597-019-0306-0
c1ccc(cc1)C#Cc1ccc(cc1)C#Cc1ccc(cc1)n1c2ccccc2c2c1cccc2	N/A	37767.3	https://doi.org/10.1038/s41597-019-0306-0	51500	https://doi.org/10.1038/s41597-019-0306-0
Oc1c(C=NN=Cc2ccc3c4c2ccc2c4c(cc3)ccc2)cc(cc1C(C)(C)C)C(C)(C)C	N/A	108638	https://doi.org/10.1038/s41597-019-0306-0	38600	https://doi.org/10.1038/s41597-019-0306-0
N#CC(=C(C#N)C#N)c1ccc(n1C)c1cccs1	N/A	50020.8	https://doi.org/10.1038/s41597-019-0306-0	25740	https://doi.org/10.1038/s41597-019-0306-0

## Sheet: Fig 1e
Material	No. of pi electrons	ed_film (M^-1 cm^-1)	reference	ed_solution (M^-1 cm^-1)	reference
Y5	66	168322	This work	126425	This work
Y6	66	164033	This work	140061	This work
Y7	66	168325	This work	146610	This work
O-IDFBR	58	72296	This work	76000	https://www.nature.com/articles/nmat4797
EH-IDTBR	58	107550	This work	100000	https://www.nature.com/articles/nmat4798
O-IDTBR	58	162620	This work	100000	https://www.nature.com/articles/nmat4799
ITIC	58	177134	This work	130000	https://www.mdpi.com/1422-0067/21/21/8099
IT-4F	58	131312	This work	116000	https://www.mdpi.com/1422-0067/21/21/8100
ICBA	60	22929	This work	5000	http://www.rsc.org/suppdata/c6/ta/c6ta04191d/c6ta04191d1.pdf
PC61BM	60	36532	This work	3900	https://www.nature.com/articles/ncomms11585
PC71BM	70	60998	This work	26806	https://onlinelibrary.wiley.com/doi/pdf/10.1002/anie.200351647
IEICO	62	140000	https://www.nature.com/articles/s41563-020-00835-x	130000	https://www.nature.com/articles/s41563-020-00835-x
ITIC	58	150000	https://www.nature.com/articles/s41563-020-00835-x	210000	https://www.nature.com/articles/s41563-020-00835-x
IT4F	58	75000	https://www.nature.com/articles/s41563-020-00835-x	190000	https://www.nature.com/articles/s41563-020-00835-x
IEICO-4F	62	120000	https://www.nature.com/articles/s41563-020-00835-x	170000	https://www.nature.com/articles/s41563-020-00835-x
O-IDTBR	58	120000	https://www.nature.com/articles/s41563-020-00835-x	110000	https://www.nature.com/articles/s41563-020-00835-x
ITIC	58	68000	https://pubs.acs.org/doi/pdf/10.1021/jacs.7b02677	130000	https://www.mdpi.com/1422-0067/21/21/8099
IT-4F	58	76000	https://pubs.acs.org/doi/pdf/10.1021/jacs.7b02677	116000	https://www.mdpi.com/1422-0067/21/21/8100
FBR	52	81000	https://www.nature.com/articles/s42005-018-0026-3	54000	https://www.nature.com/articles/nmat4797
IDIC	50	170000	This work	240000	https://pubs.acs.org/doi/10.1021/jacs.6b00853

## Sheet: Fig S5
Material	No. of pi electrons	ed_tddft (M^-1 cm^-1)	reference	ed_film (M^-1 cm^-1)	reference
PC61BM	60	444	This work	36532	This work
PC71BM	70	61.24	This work	60997	This work
Y5	66	163957	This work	168322	This work
Y6	66	164080	This work	164033	This work
Y7	66	167004	This work	168325	This work
O-IDTBR	58	172830	This work	107550	This work
ITIC	58	193284	This work	177134	This work
IT-4F	58	192189	This work	131312	This work
O-IDFBR	58	116649	This work	72296	This work
O-IDTBR	58	172830	This work	162620	This work
ITIC	58	193284	This work	150000	https://www.nature.com/articles/s41563-020-00835-x
IT-4F	58	192189	This work	75000	https://www.nature.com/articles/s41563-020-00835-x
IEICO-4F	62	205364	This work	120000	https://www.nature.com/articles/s41563-020-00835-x
O-IDTBR	58	172830	This work	120000	https://www.nature.com/articles/s41563-020-00835-x
ITIC	58	193284	This work	68000	https://pubs.acs.org/doi/pdf/10.1021/jacs.7b02677
IT-4F	58	192189	This work	76000	https://pubs.acs.org/doi/pdf/10.1021/jacs.7b02678
CBM	46	80700	This work	10000	https://pubs.acs.org/doi/pdf/10.1021/acs.chemmater.6b00131
FBR	52	115000	This work	81000	https://www.nature.com/articles/s42005-018-0026-3
IDIC	50	180000	This work	170000	This work

## Sheet: epsilon_d of Y5, Y6, & Y7 in CB
Solvent: Chlorobenzene Concentration = 5 ug/ml
Energy (eV)	Y7 ed_sol (M^-1 cm^-1)	Y6 ed_sol (M^-1 cm^-1)	Y5 ed_sol (M^-1 cm^-1)
4.13333	27417.6	25651.9	32637.1
4.1196	28000.1	26043.1	32542.6
4.10596	27864.7	26604.9	33051.6
4.09241	28492.2	26975.9	33355.9
4.07895	29472.6	27950.1	33868.1
4.06557	29330.3	28417.4	33911.1
4.05229	29708.6	28708.7	33734.2
4.03909	30004.5	28994.7	34757.8
4.02597	30749	29343.6	34095.9
4.01294	31186.8	30005	34462.7
4	32391.2	29725.1	34773.1
3.98714	32964.8	30725.5	34684.2
3.97436	32639.7	30459.3	34397.3
3.96166	33732.6	30479.9	34280.1
3.94904	34539.4	31331.3	33892.4
3.93651	34946	31696.5	34871.2
3.92405	35236.1	31434.7	34161
3.91167	35556.3	30764.9	33457.5
3.89937	35529.6	30712.6	33854.2
3.88715	36694.3	31227.9	34495.3
3.875	36700.7	31218.9	34459.4
3.86293	36042.8	31343.2	34637.7
3.85093	36411.8	31778.2	34481.6
3.83901	36250.8	31459.7	34325.6
3.82716	36649.5	31407.3	34543.8
3.81538	36737.5	31496.9	34219.3
3.80368	37159.6	31846.2	34608.4
3.79205	37388	31651.5	34761.9
3.78049	37641.6	31484.9	33669.3
3.769	37964.8	31369.2	33575.9
3.75758	37916.2	31220.2	33371.7
3.74622	37861.6	31470.1	33494.5
3.73494	38429.5	30538.7	32667
3.72372	38169.7	30716	31815.5
3.71257	37610.8	30086.5	31269.7
3.70149	37640.1	29783.1	30855.2
3.69048	37820.9	29319.3	30355.9
3.67953	37937.6	29206	30630.6
3.66864	37445.3	28415.1	30192.9
3.65782	37383.8	29233.6	30148.9
3.64706	37205	28674.6	29977.7
3.63636	36481.7	27922.3	28289.3
3.62573	35680	26397.9	28262.8
3.61516	36133.1	26409.5	27412.3
3.60465	36060.2	26718.2	28141.1
3.5942	35069.2	26039.1	27279.5
3.58382	34418	24696.6	26263.5
3.57349	33467.6	24197.6	26258
3.56322	33151.6	23368.7	25466.8
3.55301	32963.8	24404.7	25933.1
3.54286	32510.8	23217.9	25845.1
3.53276	31449.3	22643.5	25465.5
3.52273	31194.5	22533.1	24933.1
3.51275	29740.1	22304.2	24333.1
3.50282	29303.8	21873.6	24138.5
3.49296	28218	21570.9	24032.4
3.48315	29215.4	22843.5	24595.4
3.47339	28621.8	22546.9	24254.9
3.46369	27351.8	21905.8	24486.9
3.45404	25658.7	20005.5	23042.8
3.44444	25641.9	21398.6	23843.5
3.4349	25362	20754.1	23313.3
3.42541	24120	20100.6	22815.6
3.41598	23488.3	19770.9	22110.5
3.40659	23136.1	19317.5	21749.2
3.39726	22455.3	18873.3	21830
3.38798	21758	18898	21358.4
3.37875	20950.9	17824.5	20445.9
3.36957	20232.4	17244.7	20182.5
3.36043	20340.9	16821.6	19345.7
3.35135	19548.4	16499.9	19225.1
3.34232	18781.2	15488.2	18669.4
3.33333	18663.6	15282.6	18167
3.3244	18718.4	14900.7	17371.1
3.31551	17818.5	14307.9	16899.3
3.30667	18011.6	13984.6	16398.3
3.29787	17605.6	13297.8	16000.6
3.28912	17297.4	13194.8	16044.7
3.28042	17035.7	12622.1	15282.4
3.27177	16315.2	12364.9	14837.2
3.26316	16231.7	11946.7	14334.2
3.25459	16176.2	11872.7	14430.2
3.24607	15752.2	11692.5	14278.7
3.2376	15339	11317.7	14186.2
3.22917	14721.8	11330.5	13966.5
3.22078	14459	10969.9	13682.8
3.21244	14265.3	11122.9	13571.7
3.20413	13969.3	10847.8	13489.6
3.19588	13939.2	11068.4	13655.2
3.18766	13810.5	11025.8	13537.6
3.17949	13785.6	10603.8	13445.5
3.17136	13803.6	10782.2	13444.2
3.16327	13604.4	10553.5	13122.2
3.15522	13627.3	10632.6	12903.9
3.14721	13656.8	10491.7	12515.2
3.13924	13899.7	10328.5	12746.3
3.13131	13568.2	9672.11	12278.7
3.12343	13880	9327.53	12231.2
3.11558	13855.1	9313.49	11970.3
3.10777	13668	8890.89	11519
3.1	13703.2	8690.28	11644.6
3.09227	13699.1	8730.44	11376.5
3.08458	13139.1	8223.09	11140.6
3.07692	13015.4	8125.48	10866
3.06931	12730.1	7799.79	10684.7
3.06173	12282	7254.88	10611.4
3.05419	12003.6	7466.05	10618.2
3.04668	11452.2	7339.75	10319.4
3.03922	10417.9	6561.43	10119.4
3.03178	10090.3	6443.92	10112.8
3.02439	9599.18	6308.99	9910.39
3.01703	9536.21	6424.96	10019.5
3.00971	9217.54	6311.8	10275.8
3.00242	9046.58	6473.75	10255.6
2.99517	8505.47	6527.11	9880.86
2.98795	7962.16	6173.96	10041
2.98077	8052.26	6640.02	10252.8
2.97362	7438.27	6299.69	10106.6
2.96651	7548.79	6512.11	10148.2
2.95943	7243.23	6468.18	10189.3
2.95238	7300.04	6801.06	10057.1
2.94537	7184.39	6777.13	10327.2
2.93839	7141.4	6958.79	10063.5
2.93144	7107.51	6913.06	10190
2.92453	7245.7	7017.46	10349.8
2.91765	6873.69	7143.4	10331.6
2.9108	7136.39	7253.36	10579.4
2.90398	7237.36	7499.49	10761.5
2.8972	7294.06	7663.95	10710.8
2.89044	7399.32	7389.37	10828.4
2.88372	7385.56	7813.48	10985.1
2.87703	7483.76	8099.17	11057.7
2.87037	7626.64	7965.14	11334
2.86374	7900.59	8136.23	11225.1
2.85714	7855.48	8368.84	11536.7
2.85057	7970.7	8590.41	11764.5
2.84404	8090.28	8598.59	11770.3
2.83753	8322.8	8645.15	12094.7
2.83105	8340.34	8831.3	12257.7
2.8246	8556.38	9029.57	12480.5
2.81818	8566.2	9192.99	12688.5
2.81179	8744.11	9289.55	13055.6
2.80543	8990.97	9812.69	13107.6
2.7991	9045.73	9862	13310
2.79279	9288.92	10014.8	13373.9
2.78652	9474.39	10274.2	13473.9
2.78027	9333.28	10028.3	13440.3
2.77405	9703.15	10775.6	13781.3
2.76786	9823.97	11035.4	14131.6
2.76169	10120.4	10874.1	14039.4
2.75556	10336	11210.6	14381.6
2.74945	10656	11399.2	14441.5
2.74336	10532	11469	14473.7
2.73731	10878.4	11727	14529
2.73128	10871.4	12174.6	14865.4
2.72527	11264.6	12153.4	14941.1
2.7193	11739.7	12535.7	15133.7
2.71335	11802.2	12732.2	15175.9
2.70742	11895.4	13022.5	15440.4
2.70153	11962.7	13021.5	15332.5
2.69565	12260.3	13110.2	15562.4
2.6898	12550.9	13321.6	15411.9
2.68398	12813.3	13328.7	15658.1
2.67819	12971.4	13561.4	15715.2
2.67241	13185.2	13915.2	15917.6
2.66667	13269	13922.1	15982.7
2.66094	13553.2	14153.3	15852.3
2.65525	13555.4	14227.6	15914.9
2.64957	14128.7	14582.3	16086.8
2.64392	14369.7	14699.9	15943.8
2.6383	14567.5	14681	16095.5
2.6327	14324.5	14926.4	15737.7
2.62712	14828.2	15151.1	15912.5
2.62156	14917.1	14991	15823.7
2.61603	15013.3	14895.1	15639.9
2.61053	15337.6	15174.6	15649.2
2.60504	15213	15058.7	15382.3
2.59958	15861.7	15319.4	15675
2.59414	15696	15196.2	15189.9
2.58873	15766.4	15196.6	15429.3
2.58333	16051	15306.9	15290
2.57796	16001.2	15143.1	14997.6
2.57261	16046.8	15019	14730.5
2.56729	16142.8	15354.2	14848.5
2.56198	16275.6	15141.6	14813.2
2.5567	16099	14870.8	14528.2
2.55144	16433.8	14912.7	14531
2.5462	16008.2	14462.3	14194.2
2.54098	16028.2	14396.9	13965.7
2.53579	16006.3	14618.9	14062.3
2.53061	15895.2	14398.4	13771.3
2.52546	15853.4	14176.6	13595
2.52033	15820.2	14375	13537.1
2.51521	15549.3	13927.4	13255.1
2.51012	15394.4	13728.1	13217.1
2.50505	15382.9	13739.8	13272.3
2.5	15490.4	13882.8	13102.4
2.49497	15235.9	13621	12824.6
2.48996	15190.6	13687.2	12673.1
2.48497	15201	13398.2	12640.6
2.48	14907.7	13137.4	12559.9
2.47505	14849.9	13176.5	12541.4
2.47012	14760.5	13142.7	12296.8
2.46521	14702	12538.2	12158.6
2.46032	14622.7	12851	12149.5
2.45545	14710.6	12822.4	12129.4
2.45059	14582.9	12590.7	11952.4
2.44576	14160.5	12350.1	11720.8
2.44094	14372.5	12350.3	11752.5
2.43615	14379.5	12250.1	11748.7
2.43137	14157.8	12059.4	11587.4
2.42661	14073	11670.1	11611.1
2.42188	14008	11758.9	11799.5
2.41715	14020.5	11761.4	11785.9
2.41245	13842.1	11558.4	11686.5
2.40777	13686.2	11610.7	11706.1
2.4031	13696.8	11520.6	11947
2.39845	13275.7	11235.1	11868.3
2.39382	13534.3	11293.8	11992
2.38921	13695.5	11515.5	12345.1
2.38462	13175.2	11155.6	12317.5
2.38004	13048.9	11137.8	12280.8
2.37548	12957.3	11171.8	12502
2.37094	12648.8	10933.3	12321.5
2.36641	12960.5	11223.2	12784.3
2.3619	12617.6	11282.1	12916.7
2.35741	12469.2	10935.1	13095.3
2.35294	12705.6	11446	13513
2.34848	12444.8	11434.9	13563.4
2.34405	12599.5	11799.8	13982.9
2.33962	12718.6	11876.9	14442.7
2.33522	12608.8	12016.7	14621.2
2.33083	12708.1	12032.9	14624.1
2.32645	12571.7	12002.6	14774.2
2.3221	12671.7	12184.1	15139.3
2.31776	12238.7	12424.7	15184.5
2.31343	12812.8	12681.6	15551.7
2.30912	12827.3	13152.4	15791.5
2.30483	13166	13383.2	16391.8
2.30056	13133.3	13546.6	16499.7
2.2963	13575.5	13922.5	16669.9
2.29205	13805.9	14481.4	16886.4
2.28782	13932.1	14579.7	16983.1
2.28361	14259.8	14694	17509.3
2.27941	14227.6	14926.6	17455.4
2.27523	14472.3	14783.1	17693.5
2.27106	14543.1	14860.3	17784.9
2.26691	15135.7	15438	17998.8
2.26277	15447	15969.7	18551.2
2.25865	15585.6	16027.2	18659.6
2.25455	15808.8	16180.1	18747.2
2.25045	16212.5	16483.6	19221.6
2.24638	16423.7	16596.3	19747.4
2.24231	16668.3	16699.9	19832
2.23827	16968.5	16867.2	20173.2
2.23423	17023.4	17175.6	20587
2.23022	17061.2	17360	20895.6
2.22621	17386.6	17465	21380
2.22222	17583.7	17594.3	21790.8
2.21825	17847.5	18135	22075.4
2.21429	18012.6	18463.2	22697.6
2.21034	18230.3	18745.4	23532.7
2.20641	18457.9	18966.1	23923.7
2.20249	18511.9	19253.3	24324.5
2.19858	18861.7	19563.5	25329.4
2.19469	19048.8	20041.6	26160.4
2.19081	19266.1	20338.9	26964.6
2.18695	19552.7	20972.3	27677.8
2.1831	19617.5	21373.4	28209.8
2.17926	19906.5	21855.3	29232.2
2.17544	20184.4	22214.7	29704.9
2.17163	20359.7	22832.3	30367.6
2.16783	20880.1	23667.9	31375.9
2.16405	21363.8	24360.5	32013.6
2.16028	21835.5	25194.4	33018.4
2.15652	22343.2	25805.1	33457.4
2.15278	22749.3	26588.8	34012.2
2.14905	23102.5	27217.4	34749.5
2.14533	23650.2	28332.7	35574.7
2.14162	24125.3	28485	35635.7
2.13793	24788.9	29429.5	36277.3
2.13425	25605.2	30374.7	36721.2
2.13058	26103.6	30870	36762.9
2.12693	26966.1	31552.6	36947.1
2.12329	27297.5	31969.1	36965
2.11966	28140	32905.2	37255.2
2.11604	29284.9	33725	37411.9
2.11244	29718.8	34098.4	37213
2.10884	30750.6	34457.9	37105.6
2.10526	31525.4	35029.8	36844.8
2.10169	32031.5	35489	36650.8
2.09814	33029	35799.2	36421.2
2.09459	33633.6	35923	36030.9
2.09106	34350.4	36111.2	35630.2
2.08754	34834.9	36392.5	35128.2
2.08403	35628.3	36159.6	34803.9
2.08054	36318.1	36484.1	34674.9
2.07705	37260.3	36555.1	34067.4
2.07358	37224.4	35982	33434.2
2.07012	37954.9	36013.7	33101.5
2.06667	38326.9	35977.5	32563.1
2.06323	38556.9	35713.9	32431.8
2.0598	39004.6	35070.1	32022.8
2.05638	38665.6	34664.5	31445.4
2.05298	39085.7	34521.7	31264.9
2.04959	38942.3	33914.7	30610.5
2.0462	38984.5	33456.3	30510.7
2.04283	38820.4	33139.5	30291.7
2.03947	38630.7	32507.1	30018.3
2.03612	38332	32021.3	29786.6
2.03279	38295	31817.8	30104.4
2.02946	37583.3	31043.1	29753.3
2.02614	37349.4	30887.3	30020.1
2.02284	36639.4	30410.2	29913.7
2.01954	36281.1	29787.4	30028.8
2.01626	35879	29606.7	30226.7
2.01299	35467.2	29487.8	30640.2
2.00972	35305.6	29260.7	30980.2
2.00647	34252	28798.2	31404.1
2.00323	33643.4	28518.6	31740
2	33153.9	28531	32287.6
1.99678	32552.5	28339.7	32508.9
1.99357	31903.4	28415.9	33362.1
1.99037	31900.5	28792	34103.4
1.98718	30533.5	28592.5	34321.5
1.984	30637	28657.3	35598.6
1.98083	30444.7	29116.1	36305.5
1.97767	30031.3	29495.4	37040.4
1.97452	29616.5	29833.7	37931.3
1.97138	29450.2	30163.7	38680.6
1.96825	29184.5	30534.1	39629.7
1.96513	29085.3	31011.6	40815.6
1.96203	29110.1	31612.4	41885.8
1.95893	29294.7	32553.4	43107.8
1.95584	28914.9	32641.5	43535.7
1.95276	29089	33717.8	44798.7
1.94969	29130.2	34520.4	45667.2
1.94662	29782.3	35428.4	46764.4
1.94357	29689.7	36359.3	47663.1
1.94053	30070.5	37230.7	48611.8
1.9375	30636.1	38236.3	49753.5
1.93448	30958.2	39388	50619
1.93146	31983.3	40454	51758.1
1.92846	32311	41289.2	52468.6
1.92547	32893.4	42842.6	53668.4
1.92248	33477.1	43574	54602.2
1.9195	34355.2	44605	55021.9
1.91654	35191.4	45649.7	55860.8
1.91358	36109.7	46701.1	56730.4
1.91063	36810.1	47910.2	57141.9
1.90769	37763.7	48762.9	57556.9
1.90476	38673.3	49729.1	58155.2
1.90184	39623	50737.7	58196.3
1.89893	41102.2	51888.5	59410
1.89602	41630.8	52805.6	59407
1.89313	42565.1	53228	59748.7
1.89024	43567.8	54574.3	60020.1
1.88737	44956.4	55075.6	60605.2
1.8845	45939.1	56106.3	60607.8
1.88164	47304.9	56880.2	61057.8
1.87879	48479.2	57441.9	61556.5
1.87595	49230.6	58200.5	61801.7
1.87311	50797.5	58853.1	62043.4
1.87029	51336.3	59713.9	62391.5
1.86747	52654.3	59903.9	62452.6
1.86466	53317.7	60607.5	62612.4
1.86186	53831.8	60423	62825.7
1.85907	55006.4	61010.6	62844.4
1.85629	55897.8	60841.8	63529.2
1.85351	56538.9	61713.8	64294.1
1.85075	57301.4	61831.9	64198.6
1.84799	58009.7	62200.5	64859
1.84524	58436.6	62148.4	65384.3
1.8425	59356.3	62498.5	66131.4
1.83976	59628.9	62545.2	66580.1
1.83704	60381.3	63021.2	67627.9
1.83432	61013.5	63273.2	68399.8
1.83161	61320.5	63322.8	69232.8
1.82891	61523.7	64025	70858.3
1.82622	62052.4	64423.3	71906
1.82353	62478.9	64405	73226.5
1.82085	62611.6	65287.8	74520.1
1.81818	62902.8	65622.3	75725
1.81552	62604.3	65909.6	76926.5
1.81287	63260.6	66592.5	78447.4
1.81022	63735.9	67517.6	80924.2
1.80758	63450.1	68165.8	81880
1.80495	63945.9	69164.8	83971.1
1.80233	64251.1	70067.7	85453.8
1.79971	64301.4	70626.6	87212.9
1.7971	64883.4	71772	89324.7
1.7945	64765.3	73208.7	91039.8
1.79191	65120	74195.7	93217.5
1.78932	65456	75629.7	95078.4
1.78674	66308.6	77258	97331.7
1.78417	66915	78938.4	99378.5
1.78161	67003.9	80207.6	101106
1.77905	68159.4	82211.1	102994
1.7765	68491.6	83810.7	105444
1.77396	69384.2	85382.7	106936
1.77143	70395.8	87534.2	109397
1.7689	71779.3	89830.1	111006
1.76638	72470.6	92032.6	112720
1.76387	74003.4	94359.7	115027
1.76136	75131.4	96683.5	116954
1.75887	76672.8	99113.4	118121
1.75637	78317.8	101142	120140
1.75389	80018.8	103940	121188
1.75141	81720.2	106202	122441
1.74894	83194.5	108460	123061
1.74648	85536.2	110766	124860
1.74402	87064.9	113600	125261
1.74157	89332.5	116003	125637
1.73913	91339.8	117999	126093
1.73669	93601.3	120534	126038
1.73427	95940	122377	126153
1.73184	98382.1	124137	126425
1.72943	100161	126691	125820
1.72702	102793	128956	125388
1.72462	105477	130061	124902
1.72222	107889	132174	124456
1.71983	109470	133328	122464
1.71745	113080	134589	121739
1.71508	115022	135771	120270
1.71271	117498	137060	118533
1.71034	119166	137131	116657
1.70799	122720	138638	115135
1.70564	124665	138731	113194
1.7033	127326	139486	110730
1.70096	129325	139668	108723
1.69863	131246	140061	105838
1.69631	132726	139231	103259
1.69399	135379	138909	101536
1.69168	137403	138546	98611.8
1.68937	139017	136996	95834.9
1.68707	140376	136209	92560.1
1.68478	141347	134996	89924.1
1.6825	142717	132879	86097.5
1.68022	144051	131493	83849.5
1.67794	144715	129839	79802.2
1.67568	146200	127398	76617.7
1.67341	146132	125545	74453.9
1.67116	146599	122672	71229.9
1.66891	146539	119636	67344.6
1.66667	146610	117189	64957.8
1.66443	146264	114790	62056.6
1.6622	146030	112134	59191.5
1.65997	145757	108005	55668.6
1.65775	143766	105119	52987.5
1.65554	143132	102735	50863.5
1.65333	141912	99156.1	48188.2
1.65113	139954	96124.2	45313.6
1.64894	137626	92799.8	43027.3
1.64675	135849	88777.3	40250.7
1.64456	134537	85630.9	38253.2
1.64238	132462	82377.9	35744.1
1.64021	129369	78352.9	33938.2
1.63804	128087	76166.4	32016.1
1.63588	123909	72066.5	29677.3
1.63373	121591	69439.2	28122.2
1.63158	118397	66237.2	25947.7
1.62943	115516	62509.2	24452
1.6273	112825	60162.6	22870.8
1.62516	109242	56966.5	21408.7
1.62304	106323	53772	20339.1
1.62092	102523	50512.5	17921.8
1.6188	98367.1	47066.9	16542.4
1.61669	95705.6	45576	15921.7
1.61458	92031.6	42418.8	14256.8
1.61248	87417.4	39050.6	12838.4
1.61039	84778.7	37366.4	12435
1.6083	80381.2	34430.8	11597.6
1.60622	77475	32663.6	10624.1
1.60414	74223.3	30483.6	9842.53
1.60207	69463.9	27974.6	8871.78
1.6	67048	26210.1	8051.27
1.59794	64869.6	24508.8	7496.41
1.59588	61057.7	23207	7016.69
1.59383	57470.1	21741.1	6645.96
1.59178	54188.3	19210.3	5776.25
1.58974	52610.2	18063.8	5749.11
1.58771	48894.7	16903.7	5205.8
1.58568	46242.3	16531.1	4715.74
1.58365	44369.9	14542.9	5139.07
1.58163	40527.9	12889.8	4158.08
1.57962	37961.9	11139	3283.01
1.57761	36917.6	11830	3901.18
1.5756	34520.2	10587.4	3542.42
1.5736	32019.2	8849.58	2384.28
1.57161	30126.7	8009.65	2582.93
1.56962	28091.6	8212.66	2317.04
1.56764	24979.9	6219.22	2355.44
1.56566	23217.7	6950.62	1167.95
1.56368	22149.3	5067.29	1782.65
1.56171	20376.8	5284.43	1160.74
1.55975	19262.6	5260.2	1407.41
1.55779	17805.7	4120.01	939.722
1.55583	16635.1	3124.47	1905.58
1.55388	15749.1	3443.24	1113.09
1.55194	13756.1	2207.88	1035.85
1.55	13441.9	3653.64	1770.25
1.54806	12796.6	3025.93	1601.18
1.54613	10689.6	1425.13	890.722
1.54421	11076.7	2280.33	700.154
1.54229	9603.28	2348.16	1704.89
1.54037	9965.39	2622.61	1950.25
1.53846	7744.42	1685.23	414.413
1.53656	7861.14	2502.76	1396.75
1.53465	5852.18	910.458	509.197
1.53276	6022.55	1541.75	1214.85
1.53086	5249.41	1388.77	1127.46
1.52898	4009.9	26.5633	233.969
1.52709	4314.95	179.598	1375.75
1.52522	5121.56	1068.96	2093.9
1.52334	3908.38	1153.75	687.934
1.52147	2942.21	-1202.2	-555.317
1.51961	2363.92	-51.0443	676.442
1.51775	3652.4	1824.1	475.254
1.51589	2640.75	1314.03	1074.07
1.51404	1835.07	-485.497	356.731
1.5122	2486.49	-237.654	506.769
1.51035	-95.073	-3.52059	176.269
1.50852	1959.37	66.0688	2039.07
1.50668	1817.96	-192.908	-1334.44
1.50485	1122.87	-796.426	1144.27
1.50303	1966.89	256.747	521.225
1.50121	-246.352	-1025.97	-333.062
1.4994	2514.68	-349.495	1761.18
1.49758	-307.597	-189.94	1492.43
1.49578	1993.69	1116.56	2218.1
1.49398	-395.29	-1481.85	1284.1
1.49218	997.025	-747.831	1926.61
1.49038	1360.18	-349.519	948.21
1.4886	1642.06	-121.624	314.373
1.48681	-331.867	1062.48	510.38
1.48503	438.29	-613.764	-179.745
1.48325	1164	1484.32	451.66
1.48148	1061.71	-299.67	2679.65
1.47971	-74.2969	450.394	1008.03
1.47795	199.043	-864.057	846.253
1.47619	1263.91	370.505	1452.96
1.47444	2165.25	672.612	2034.16
1.47268	1576.71	-352.163	661.424
1.47094	657.718	836.363	2790.98
1.46919	-996.134	1244.99	545.664
1.46746	-619.236	-1391.36	254.763
1.46572	-112.671	-1838.84	-1502.42
1.46399	55.9488	2077.24	1666.37
1.46226	-1949.59	117.451	1031.58
1.46054	-46.2948	-1643.34	-389.255
1.45882	263.107	464.844	2299.56
1.45711	158.808	1823.73	1497.86
1.4554	1717.6	2479.45	1694.71
1.45369	438.048	520.493	2778.14
1.45199	-219.475	794.23	-262.247
1.45029	140.215	-141.808	-115.231
1.4486	-1586.86	-46.0282	578.694
1.44691	102.936	177.53	3802.48
1.44522	-4638.47	-2900.75	-1487.13
1.44354	-2040.95	-810.569	-1896.19
1.44186	100.439	-981.203	87.6518
1.44019	-2885.89	-1113.8	-501.175
1.43852	-2200.16	-338.013	186.166
1.43685	592.895	322.657	3785.71
1.43519	-1367.61	-1830.22	-2059.85
1.43353	-762.563	-687.309	2111.93
1.43187	-1758.59	-1348.5	718.129
1.43022	-3363.83	-552.593	500.173
1.42857	-2475.48	-2556.09	-377.376
1.42693	223.824	-516.721	2803.18
1.42529	1105.35	-1417.52	2150.38
1.42365	-1619.84	985.691	-1573.09
1.42202	-89.7089	1472.22	633.856
1.42039	1022.15	1494.46	1458.62
1.41876	-27.8279	2991.21	976.601
1.41714	-933.42	-134.629	-642.482
1.41553	-618.245	550.735	2085.09
1.41391	170.004	-553.829	948.486
1.4123	-256.95	1856.13	-276.559
1.41069	-1540.2	-524.895	1590.25
1.40909	-77.2172	-367.596	-96.9539
1.40749	-1288.38	-240.625	-643.441
1.4059	-1960.43	-1575.77	-132.048
1.4043	262.94	767.984	1824.17
1.40271	-1566.99	-249.867	-2240.24
1.40113	-3316.03	-1739.08	-1600.78
1.39955	614.765	1649.63	3346.39
1.39797	239.213	-953.311	1113.31
1.3964	-1679.12	-377.153	663.65
1.39483	-2752.24	-2227.1	984.306
1.39326	-1115.24	-335.791	38.5439
1.39169	-360.461	-627.858	1275.69
1.39013	571.415	-994.001	267.204
1.38858	-2107.09	-1092.54	546.184
1.38702	462.97	1085.71	2091.41
1.38547	-36.1191	-672.294	3091.01
1.38393	-970.854	152.28	1019.87
1.38239	-1012.66	-1898.31	-1028.36
1.38085	-269.842	-1293.32	-553.158
1.37931	-2304.18	-1415.52	-191.574
1.37778	-2107.67	-2591.11	-1860.84
1.37625	-990.33	-1128.87	67.3857
1.37472	-169.4	-53.6108	424.663
1.3732	1671.59	-403.106	309.398
1.37168	288.342	-1874.08	965.892
1.37017	-279.205	-1115.87	785.332
1.36865	346.884	4031.58	3781.72
1.36714	-2452.78	-1156.24	-211.949
1.36564	-377.167	-2298.17	-303.941
1.36414	-288.432	-414.272	1931.82
1.36264	1871.88	2692.27	1864.87
1.36114	-325.141	-1530.49	715.598
1.35965	-548.507	-84.5667	-907.392
1.35816	1318.58	1297.72	2692.3
1.35667	-234.241	817.883	348.047
1.35519	-2743.45	-523.159	-759.332
1.35371	393.814	-1145.09	1295.9
1.35224	-2026.5	-1788.53	-624.108
1.35076	-1716.48	7.09184	-433.025
1.34929	-72.7898	1220.63	2037.45
1.34783	941.539	222.666	-943.829
1.34636	-347.779	476.533	1648.04
1.3449	-1205.12	-1097.39	63.2474
1.34345	742.283	-83.6787	852.426
1.34199	600.506	828.747	478.746
1.34054	-764.7	408.31	-183.319
1.33909	56.4512	-1469.52	47.6284
1.33765	291.184	2153.92	1683.44
1.33621	-563.544	-454.197	-683.183
1.33477	-3720.55	-1973.07	-2784.73
1.33333	-184.266	-659.122	-2158.21
1.3319	-937.222	0	114.74
1.33047	612.276	374.518	1761.96
1.32905	-1437.52	-955.905	93.6232
1.32762	-1993.74	-1505.63	-319.842
1.3262	-2573.36	-558.754	29.5807
1.32479	186.854	78.8158	785.609
1.32337	-294.371	667.005	317.505
1.32196	483.467	121.539	2590.39
1.32055	974.895	-447.521	2128.34
1.31915	1863.25	3653.32	2576.75
1.31775	-781.663	-400.953	1638.13
1.31635	31.2661	158.189	281.781
1.31495	-788.326	2272.67	1293.52
1.31356	-777.986	-1387.69	-163.051
1.31217	304.099	-308.421	795.954
1.31078	915.895	1923.25	3140.83
1.3094	-2228.11	1023.33	-1072.37
1.30802	-1609.81	665.515	2515.46
1.30664	358.067	1126.9	1865.96
1.30526	-104.752	662.316	1652.88
1.30389	346.252	995.001	1626.64
1.30252	-2433.09	-2918.93	178.423
1.30115	915.205	659.815	1949.86
1.29979	-613.327	962.248	1077.05
1.29843	903.175	110.775	1554.47
1.29707	637.447	106.557	910.811
1.29572	193.295	-80.003	2474.55
1.29436	-2733.22	74.8427	1970.25
1.29301	-1516.11	-239.519	-81.0729
1.29167	405.243	548.423	5.34834
1.29032	-1339.27	698.91	-1552.22
1.28898	-1845.06	-2124.66	-247.376
1.28764	-532.937	-1262.92	226.467
1.28631	-1027.4	-115.789	-979.422
1.28497	-1863.13	-1846.22	-1204.84
1.28364	36.2006	43.092	-419.633
1.28232	-1258.37	-781.969	792.962
1.28099	-2130.44	-997.406	1043.59
1.27967	-239.533	-722.207	-410.551
1.27835	-1416.78	651.825	2029.25
1.27703	-17.5018	-2868.37	-802.087
1.27572	-2336.63	399.127	-63.1605
1.27441	-2065.45	-5053.96	-2046
1.2731	-857.968	-366.819	442.885
1.27179	-2624.18	-1499.98	-1484.43
1.27049	771.493	2385.11	2400.72
1.26919	-44.8446	-675.899	-648.458
1.26789	956.556	2245.39	1628.49
1.2666	-543.645	-1188.24	286.862
1.26531	1205.22	873.408	-726.811
1.26402	-284.915	-2798.29	-2108.15
1.26273	-1481.85	1234.48	2573.1
1.26144	-1204.27	-1181.76	-671.667
1.26016	362.034	184.343	2100.37
1.25888	452.994	-51.5559	878.457
1.25761	-2186.85	-762.451	801.574
1.25633	1162.77	1162.77	1718.36
1.25506	-4800.47	-2233.19	-5120.12
1.25379	-2997.91	-2057.72	-238.145
1.25253	1269.33	-274.036	-29.707
1.25126	97.9061	-265.769	4405.19
1.25	-4316.11	-4524.49	-2288.74
1.24874	431.936	-841.15	-402.04
1.24748	1957.91	1091.89	1118.19
1.24623	112.889	-2587.98	72.9241
1.24498	-750.684	900.244	1373.93
1.24373	-1437.27	-1676.68	-3766.94
1.24248	-1887.32	-2150.4	2369.9
1.24124	-3620.34	-2260.13	-1155.24
1.24	-1759.35	-1461.32	-2215.45

## Sheet: Moiety database
index	smiles
1	C=C1N(C2=CC=CC=C2O1)C
2	C=C1N(C)C2=CC=CC=C2C1(C)C
3	C=C1N(C2=CC=CC=C2S1)C
4	CC(C1=CC=CC=C1N2C)(C)C2=CC=C3C(C(C=CC=C4)=C4C3=C(C#N)C#N)=O
5	O=C(C1=CC=C2N(C)C3=CC=CC=C3S2)C4=C(C1=C(C#N)C#N)C=CC=C4
6	O=C(C(C=CC=C1)=C1C2=C(C#N)C#N)C2=CC=C3NC4=CC=CC=C4S3
7	NC1=CC=CC=C1
8	C=C1SC2=CC=CC=C2S1
9	C=C(C1=C2C(C=CC=C23)=CC=C1)N3C
10	CN1C2=CC=C3C(C4=CC=C3)=C2C(C=C4)=C1
11	C=C(C(C1=CC=CC=C1)(C2=CC=CC=C2)C3=CC=CC=C34)N4C
12	CC1(C)C=C(C#N)C(O1)=C(C#N)C#N
13	N#CC1=CC(C2=CC=CC=C2)(C3=CC=CC=C3)OC1=C(C#N)C#N
14	CC1(C)C=C(C#N)C(S1)=C(C#N)C#N
15	N#CC1=CC(C2=CC=CC=C2)(C3=CC=CC=C3)SC1=C(C#N)C#N
16	C12=CC=CC=C1N=CS2
17	C12=C(C=CS2)N=CS1
18	C12=C(SC=C2)N=CS1
19	N#CC(C#N)=C1C=COC=C1
20	N#CC(C#N)=C1C=CSC=C1
21	O=C1C(C2=CC=CC=C2N1C)=C(C3=C(C=CC=C3)N4C)C4=O
22	C[Si](C1=C2SC=C1)(C)C3=C2SC=C3
23	C1([Si](C2=CC=CC=C2)(C3=CC=CC=C3)C4=C5SC=C4)=C5SC=C1
24	O=C1C=C(C#N)C(S1)=C(C#N)C#N
25	O=C(C1=CC2=C(C=C1C3=O)C4=CC=CC5=C4C2=CC=C5C#N)N3C
26	O=C(C1=C(C2=CC=CS2)C3=C(C(C4=CC=CS4)=C1C5=O)C6=CC=CC7=C6C3=CC=C7)N5C
27	C12=CC=CC=C1N=CO2
28	CC1=CN=C2N1C=CC=N2
29	O=C1C=C(C)OC2=CC=CC=C21
30	O=C1C2=CC=CC=C2C=C(C)O1
31	O=C(C=C1)SC1=C
32	C#CC1=C(F)C(F)=C(C#N)S1
33	O=CC1=CC(F)=C(C#N)O1
34	N#CC1=CC=C(SC=C2)C2=C1
35	FC(S1)=CC2=C1N=C(SC(F)=C3)C3=C2
36	O=C(O)C1=C(C#N)ON=C1C#N
37	O=C(O)C1=CON=C1
38	N#CC1=CSC2=C1C(C(C#N)=CS3)=C3S2
39	O=C(C1=CC=CS1)C2=COC=C2
40	C1=CN=CN=C1
41	C=CC1=NC=NC=C1
42	O=C(C1=CC=CS1)C2=COC=C2
43	O=C1NC2=C(C=CC=C2)C1=C(S3)C=CC3=C4SC(C=C4)=C5C(NC6=C5C=CC=C6)=O
44	FC(S1)=C(F)C2=C1N=C(SC=C3)C3=C2
45	O=CC1=CC=NO1
46	O=C(N1C=NC=C1)N2C=CN=C2
47	O=CC1=COC(C2=CC(SC=C3)=C3S2)=N1
48	O=CC1=COC=N1
49	N#CC1=CN=CS1
50	O=C(O[H])C1=CSC=C1
51	N#CC1=CSC(C#N)=C1
52	O=C1NC2=CC=CC=C2C=C1C#N
53	O=CC1=CC=CC=C1[N+]([O-])=O
54	O=C(NC1=O)C2=CC=C3C4=C(C5=C6C3=CC=C7C6=C(C(NC7=O)=O)C=C5S8)C8=CC1=C42
55	[H]C(F)(F)F
56	[H]C(O)=O
57	[H]C#N
58	O=C1N(C)C(C(C1=C2)=CC3=C2C4=C5C(C=CC=C53)=CC=C4)=O
59	O=C(N(C1=O)C)C2=CC=C3C4=C(C(N(C3=O)C)=O)C=CC1=C42
60	FC1=NC2C=CC=CC2N=C1F
61	FC1=CC2=NSN=C2C=C1
62	FC1=C(F)C=C(F)C(F)=C1
63	O=CC(S1)=CC2=C1C3=CC(S4)=C(C=C3S2)C5=C4C=C(C=O)S5
64	O=C1C2=CSC=C2C(C3=C(C(F)(F)F)SC(C(F)(F)F)=C31)=O
65	C12=CC=CC3=C1N(C=C3)C4=C(C=CC=C4)S2
66	C(C1=CC=CC=C1)(C2=CC=CC=C2)=C(C3=CC=CC=C3)C4=CC=CC=C4
67	O=C(C(C=C1)=CC=C1C=CC2=CC=C(C(O)=O)C=C2)O
68	FC(C(F)=C(F)C(F)=C1F)=C1C=CC2=C(F)C(F)=C(F)C(F)=C2F
69	FC1=CSC2=C1SC3=C2SC=C3F
70	C1=CN=CN=N1
71	C[Si]1(C=C(OCCO2)C2=C1)C
72	O=C(C(SC1=C(C#N)C#N)=C)N1C
73	O=C1NC(C2=CC=CC=C21)=O
74	S=C(SC1=C)N(C1=O)C
75	FC1=C(F)C=C(F)C(F)=C1F
76	FC1=C(C=C(C(F)=C1C(O)=O)F)F
77	N1=CN=CN=C1
78	C12=CC=CC=C1NC=N2
79	O=C1NC=CC=C1
80	N1=CN=CC=C1
81	O=C(C1=C2C(C(C)=CC=C23)=CC=C1)NC3=O
82	O=C1C(C(N(C)C(N1C)=O)=O)=C
83	C12=NSN=C1OCCO2
84	O=C1C(C2=C(C3=CC=C(C4=C(F)C(F)=C([N+]#[C-])C(F)=C4F)S3)N1)=C(C5=CC=C(C6=C(F)C(F)=C(C#N)C(F)=C6F)S5)NC2=O
85	O=C(NC1=O)C2=CC([He])=C3C4=C(C(NC3=O)=O)C=C([He])C1=C42
86	C12=C[SiH2]C=C1OCCO2
87	O=CC1=CC=CS1
88	CN1C=NC(C#N)=C1C#N
89	C=C1C2C(C(C(C=CC=C3)=C3N2C)=C(C#N)C#N)N(C4=CC=CC=C41)C
90	C12=CSC=C1SCCO2
91	C12=CSC=C1SCCS2
92	C=C1SC2=CC=CC=C2S1
93	O=C(C(C=CC=C1)=C1C2=C(C#N)C#N)C2=CC=C3NC4=CC=CC=C4O3
94	C12=CSC=C1SCCO2
95	[He]C1=C2C(SCCS2)=C([He])S1
96	N#CC(C#N)=C1C2=C(SC=C2)C3=C1C=CS3
97	C1(C(SC=C2)=C2C34OCCO4)=C3C=CS1
98	C1(C(SC=C2)=C2C34SCCS4)=C3C=CS1
99	C12=CSC=C1N=CC=N2
100	C12=CSC=C1C=C3C(N=S=N3)=C2
101	C1=CC=CS1
102	C12=NSN=C1C=CC=C2
103	O=C1N(C)C=C2C(N(C)C=C21)=O
104	C1(C=CS2)=C2C=CS1
105	C1(C=CS2)=C2C(SC=C3)=C3C4=C1SC=C4
106	CC1=C2C=CSC2=C(C)C3=C1SC=C3
107	COC1=C2C(C=CS2)=C(OC)C3=C1C=CS3
108	FC1=C(C(OC)=O)SC2=CSC=C12
109	O=C(C1=CC2=CSC=C2S1)OC
110	CC1(C2=C(C3=CC4=C(C=C13)C5=C(C6=C(S5)C=CS6)C4(C)C)SC7=C2SC=C7)C
111	O=C1C2=CC=CC=C2/C(C1)=C(C#N)\C#N
112	O=C(C/1)C2=CC(F)=C(F)C=C2C1=C(C#N)\C#N
113	COC1=CC=C(OC)C=C1
114	C1(CC2=C3C=C4CC5=CC=CC=C5C4=C2)=C3C=CC=C1
115	C12=CC=CC=C1C3=C(C=CC=C3)N2
116	FC1=CC2=NSN=C2C=C1F
117	O=C1C2=C(SC(C)=C2C(C3=CSC=C31)=O)C
118	CC1(C)C(C=CS2)=C2C3=C1C=CS3
119	C12=C(C=CC=C2)C3=C(C=CC=C3)C1
120	O=C1C2=CSC=C2C(N1C)=O
121	CC1(C)C(C=C2C(C(C3=C2C=C4C(C=CS4)=C3)(C)C)=C5)=C5C6=C1C=C7C=CSC7=C6
122	C1(N=CC=N2)=C2C=CC=C1
123	CC1=CSC2=C1SC3=C2N(C)C4=C3C5=NSN=C5C6=C4N(C)C7=C6SC8=C7SC=C8C
124	O=C(C1=CC(Cl)=C(C=C1/2)Cl)CC2=C(C#N)/C#N
125	CN1C(C=CS2)=C2C3=C1C(N(C4=C5SC=C4)C)=C5C6=NSN=C36
126	CC1(C)C(C=C2C(C(C3=C2SC=C3)(C)C)=C4)=C4C5=C1C=CS5
127	O=C1C2=CC(C)=CC=C2/C(C1)=C(C#N)/C#N
128	O=C1C2=CC=C(C)C=C2/C(C1)=C(C#N)/C#N
129	ClC1=CSC=C1
130	FC1=CSC=C1
131	C12=CC=CC=C1N=C(C3=CC=CC=C3)C(C4=CC=CC=C4)=N2
132	C12=NNN=C1C=CC=C2
133	C=C(C1=O)C2=CC=C3C4=C(C(N(C)C3=O)=O)C=CC1=C42
134	CC1(C2=CC3=C(C=C2C4=C1C=CS4)C(C)(C)C5=C3SC6=C5SC7=C6C(C)(C)C8=C7C=C9C(C%10=C(C9(C)C)C=CS%10)=C8)C
135	CN1C(C=CS2)=C2C(S3)=C1C(S4)=C3C(N5C)=C4C6=C5C=CS6
136	CC1(C2=C(C3=C(C=C4C5=C(C(C)=CC4=C31)C6=C(C5(C)C)C=CS6)C)SC=C2)C
137	CC1(C2=C(C3=C1C4=CC5=CC=C(C6=C(C7(C)C)C=CS6)C7=C5C=C4C=C3)SC=C2)C
138	C1(C=CS2)=C2C3=C(C1)C=C4C5=CC(CC6=C7C=C(CC8=C9SC=C8)C9=C6)=C7C=C5CC4=C3
139	CC1(C)C(C2=C(C3=C(N2)C=CS3)S4)=C4C5=CC6=C(C7=C(C6(C)C)C8=C(C9=C(N8)C=CS9)S7)C=C51
140	O=C1C2=CC(Cl)=C(Br)C=C2/C(C1)=C(C#N)\C#N
141	O=C1C2=CC(Br)=C(Cl)C=C2/C(C1)=C(C#N)\C#N
142	CC1(C)C(C=CS2)=C2C3=C1C4=CC([Se]C5=C6C(C)(C)C7=C5SC=C7)=C6C=C4[Se]3
143	N#C/C(C#N)=C(C1=CC(OC)=C(OC)C=C12)/CC2=O
144	COC1=CSC=C1
145	N#C/C(C#N)=C(C1=CSC(C)=C12)/CC2=O
146	N#C/C(C#N)=C(C1=CSC(Cl)=C12)/CC2=O
147	O=C(N(C)C(N1C)=S)CC1=O
148	N#C/C(C#N)=C(C1=C2C3=CC=CC=C3S1)/CC2=O
149	CC1(C)C(C2=C(C=CS2)S3)=C3C4=C1C5=C(C6=C(S5)C7=C(C6(C)C)C8=C(C=CS8)S7)S4
150	CC1(C)C(C=C2C(N(C)C3=C2C=C4C(C)(C)C(C5=C(C=CS5)S6)=C6C4=C3)=C7)=C7C8=C1C(SC=C9)=C9S8
151	CC1(C)C(C2=C(C=C[Se]2)S3)=C3C4=CC5=C(C6=C(C5(C)C)C7=C(C=C[Se]7)S6)C=C41
152	FC1=CC(N=CC(OC)=N2)=C2C=C1F
153	FC1=CC2=NSN=C2C(F)=C1F
154	N#CC1=CC2=NSN=C2C(C#N)=C1C#N
155	N#C/C(C#N)=C/C#N
156	O=C([N]/1)CSC1=C(C#N)\C#N
157	C=C(C#N)C#N
158	CC1(C)C(C=C2C(C(C)(C3=CC4=C(C=C32)C(C)(C)C5=C4SC=C5)C)=C6)=C6C7=C1C=CS7
159	C12=C(C3=CC4=C(C=C3C2)C5=CC6=C(C7=C(C6)C=C8C(SC=C9)=C9CC8=C7)C=C5C4)SC=C1
